# Supplementary material for: Structure‐Activity‐Relationship‐Aided Design and Synthesis of xCT Antiporter Inhibitors
Source: PubMed Central journal article supplement — ChemMedChem. 2021 May 28;16(17):2650–68. doi: 10.1002/cmdc.202100204 (PMC8518981; doi:10.1002/cmdc.202100204), 2021-05-28

# ChemMedChem

Supporting Information

## **Structure-Activity-Relationship-Aided Design and Synthesis of xCT Antiporter Inhibitors**

Davide Cirillo, Shahin Sarowar, Per Øyvind Enger, and Hans-René Bjørsvik\*

# Supporting Information

## TABLE OF CONTENTS

---

|                   |    |
|-------------------|----|
| Compound 1.....   | 2  |
| Compound 2a.....  | 3  |
| Compound 2b ..... | 4  |
| Compound 3.....   | 5  |
| Compound 4.....   | 6  |
| Compound 5.....   | 7  |
| Compound 6.....   | 8  |
| Compound 7a.....  | 9  |
| Compound 7b ..... | 10 |
| Compound 8.....   | 11 |
| Compound 9.....   | 12 |
| Compound 10.....  | 13 |
| Compound 11.....  | 14 |
| Compound 12.....  | 15 |
| Compound 13.....  | 16 |
| Compound 14.....  | 17 |
| Compound 15.....  | 18 |
| Compound 16.....  | 19 |
| Compound 17.....  | 20 |
| Compound 18.....  | 21 |
| Compound 19.....  | 22 |
| Compound 20.....  | 23 |
| Compound 21.....  | 24 |
| Compound 22.....  | 25 |
| Compound 23.....  | 26 |
| Compound 24.....  | 27 |
| Compound 25.....  | 28 |
| Compound 26.....  | 29 |
| Compound 27.....  | 30 |
| Compound 28.....  | 31 |
| Compound 29.....  | 32 |
| DC01.....         | 33 |
| DC02.....         | 34 |
| DC03.....         | 35 |
| DC04.....         | 36 |
| DC05.....         | 37 |
| DC07.....         | 38 |
| DC08.....         | 39 |
| DC10.....         | 40 |
| DC11.....         | 41 |
| DC12.....         | 42 |
| DC13.....         | 43 |
| DC14.....         | 44 |
| DC15.....         | 45 |
| DC16.....         | 46 |
| DC17.....         | 47 |
| DC18.....         | 48 |
| DC19.....         | 49 |
| DC20.....         | 50 |
| DC21.....         | 51 |

## Compound 1

$^1\text{H}$  NMR (400 MHz, DMSO)  $\delta$  10.70 (s, 1H), 9.68 (s, 1H), 7.89 (d,  $J = 2.0$  Hz, 1H), 7.58 (dd,  $J = 8.3, 2.0$  Hz, 1H), 7.00 (d,  $J = 8.3$  Hz, 1H).

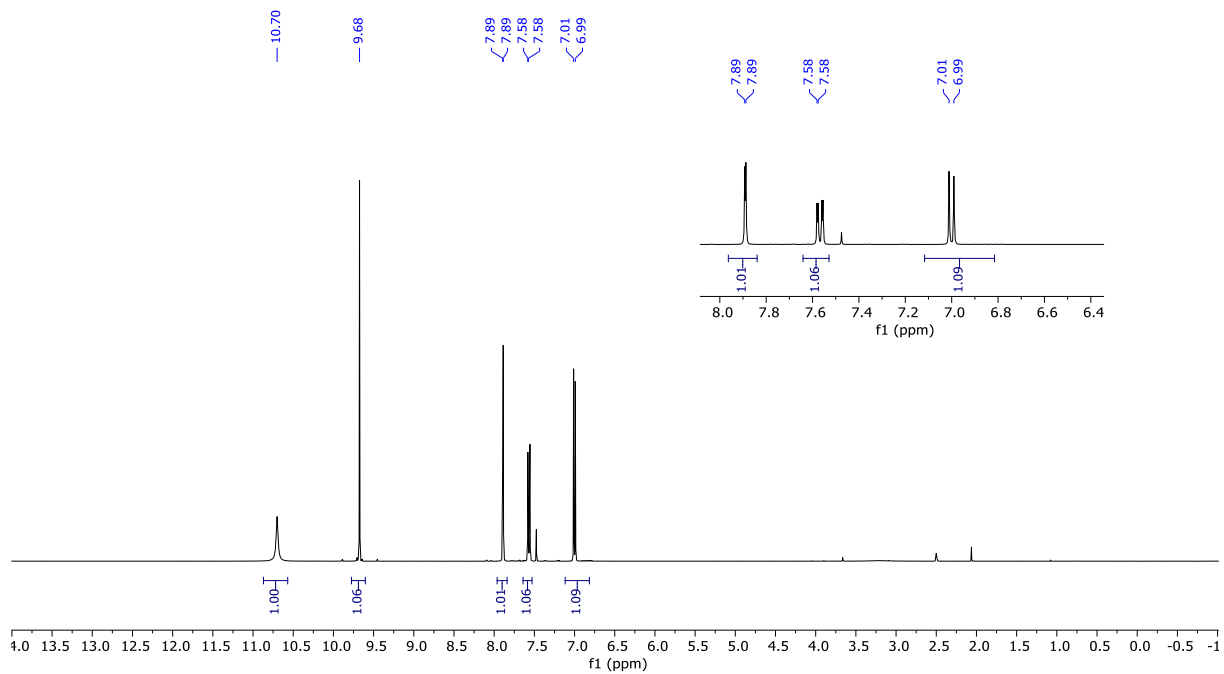

$^{13}\text{C}$  NMR (101 MHz,  $\text{CDCl}_3$ )  $\delta$  188.84, 159.44, 134.28, 130.16, 129.16, 129.13, 116.00, 110.14.

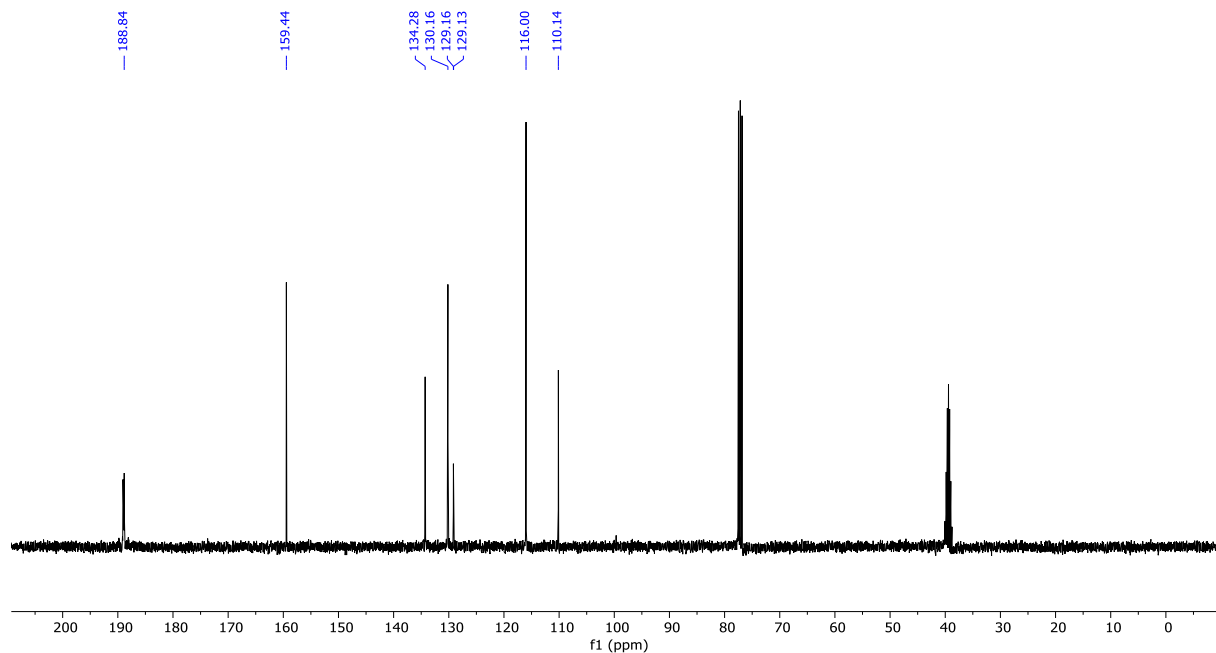

## Compound 2a

$^1\text{H}$  NMR (500 MHz,  $\text{CDCl}_3$ )  $\delta$  9.75 (s, 1H), 8.24 (d,  $J = 2.0$  Hz, 1H), 7.79 (dd,  $J = 8.5, 2.0$  Hz, 1H), 6.86 (d,  $J = 8.5$  Hz, 1H), 3.91 (s, 3H).

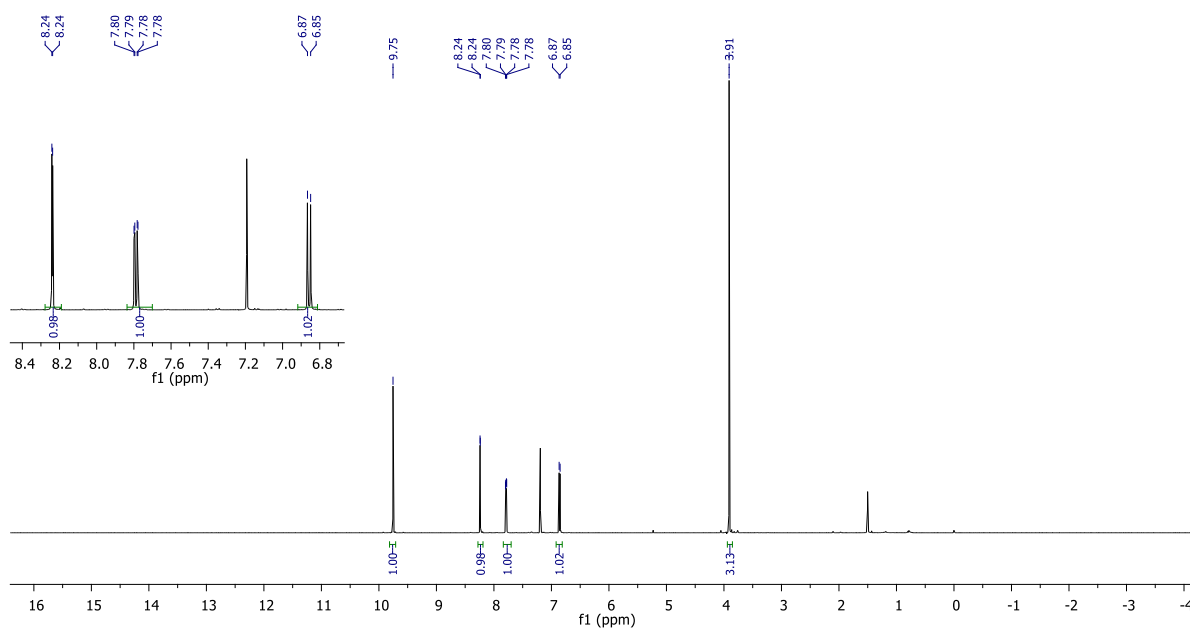

$^{13}\text{C}$  NMR (126 MHz, Acetone)  $\delta$  190.34, 161.50, 134.71, 132.12, 132.07, 113.25, 112.76, 57.23.

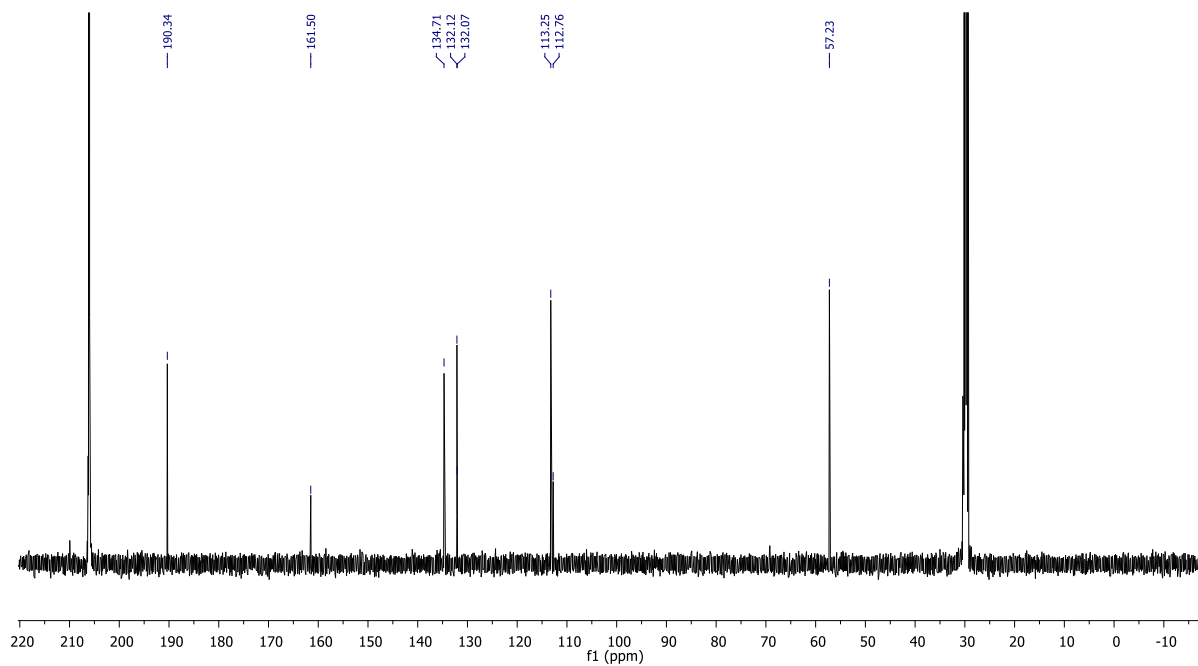

## Compound 2b

$^1\text{H}$  NMR (500 MHz,  $\text{CDCl}_3$ )  $\delta$  9.86 (s, 1H), 8.09 (d,  $J = 2.0$  Hz, 1H), 7.79 (dd,  $J = 8.5, 2.0$  Hz, 1H), 7.27 (d,  $J = 8.5$  Hz, 1H), 5.35 (s, 2H), 3.53 (s, 3H).

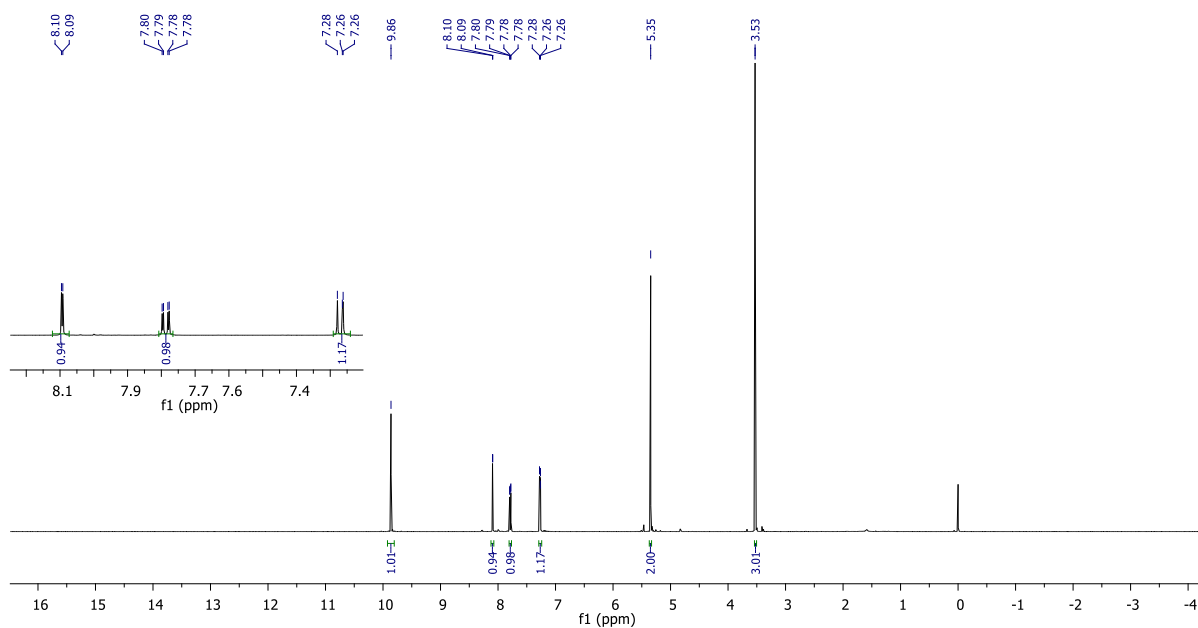

$^{13}\text{C}$  NMR (126 MHz,  $\text{CDCl}_3$ )  $\delta$  189.55, 158.42, 134.47, 131.45, 130.81, 115.06, 113.33, 94.79, 56.62.

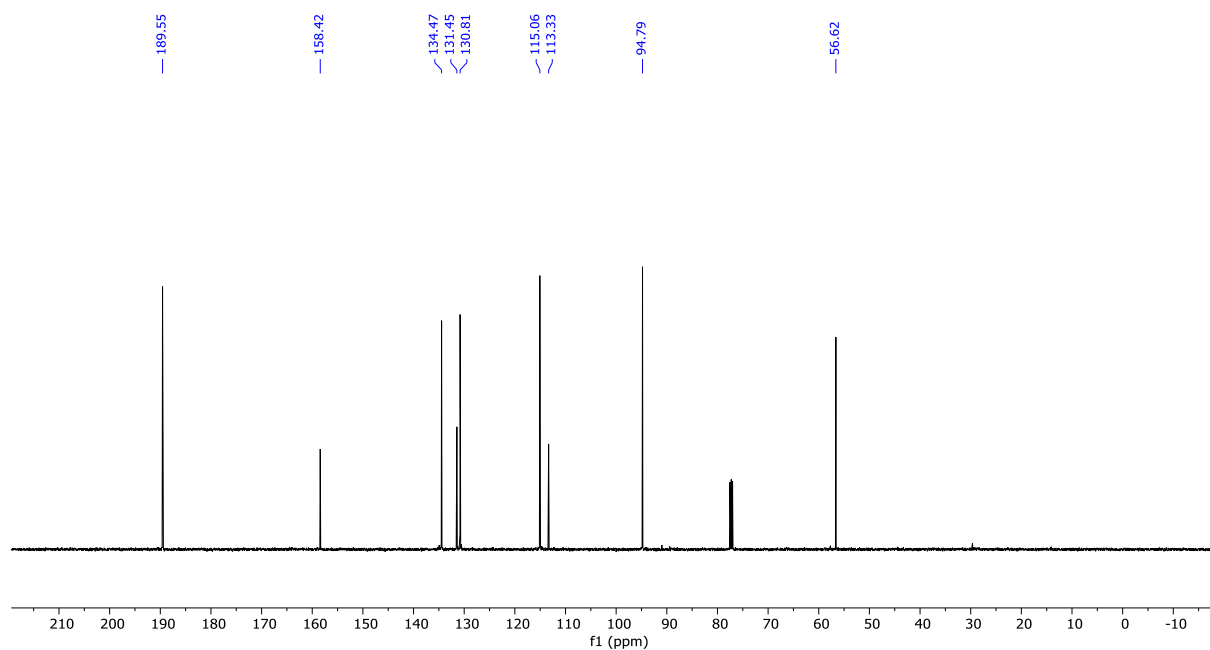

### Compound 3

$^1\text{H}$  NMR (500 MHz,  $\text{CDCl}_3$ )  $\delta$  7.74 – 7.64 (m, 9H), 7.59 – 7.50 (m, 6H), 7.18 – 7.11 (m, 1H), 7.08 – 7.00 (m, 4H), 5.46 (d,  $J = 14.5$  Hz, 2H).

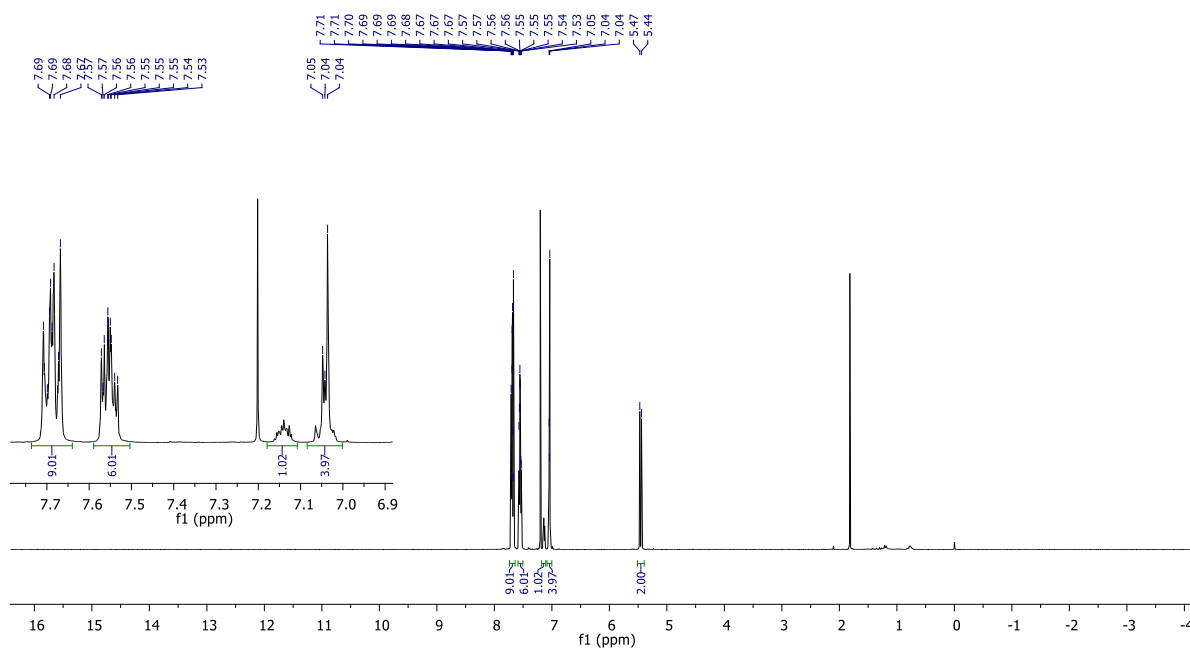

## Compound 4

$^1\text{H}$  NMR (500 MHz,  $\text{CDCl}_3$ )  $\delta$  7.61 (d,  $J = 2.2$  Hz, 1H), 7.39 – 7.33 (m, 2H), 7.24 (dt,  $J = 9.4, 5.0$  Hz, 3H), 7.19 – 7.10 (m, 1H), 6.84 (s, 2H), 6.73 (d,  $J = 8.5$  Hz, 1H), 3.76 (s, 3H).

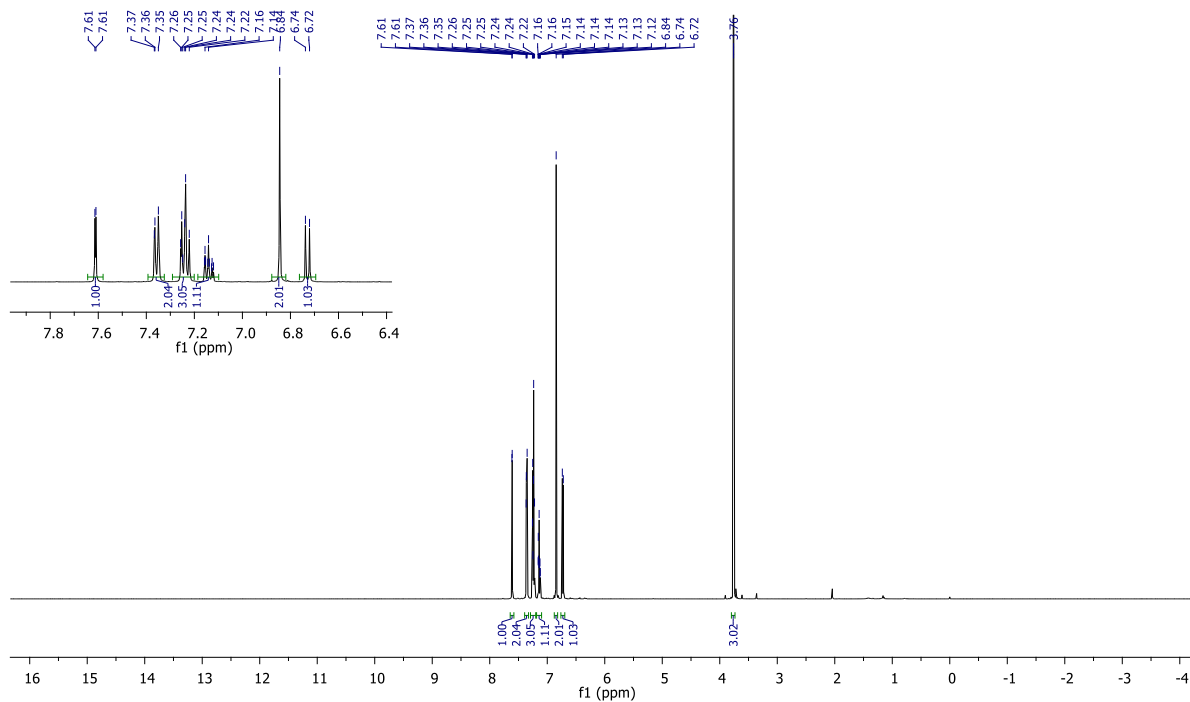

$^{13}\text{C}$  NMR (126 MHz,  $\text{CDCl}_3$ )  $\delta$  155.36, 137.18, 131.64, 131.01, 128.71, 127.99, 127.60, 126.87, 126.77, 126.39, 112.10, 111.94, 56.34.

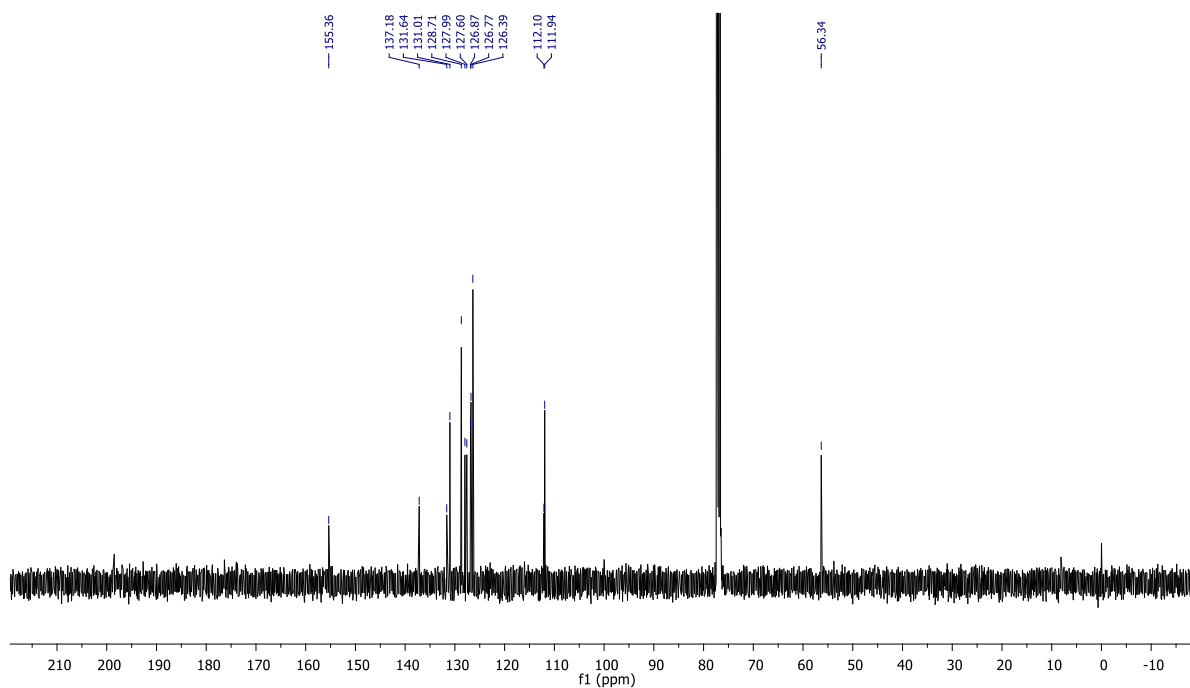

### Compound 5

$^1\text{H}$  NMR (500 MHz,  $\text{CDCl}_3$ )  $\delta$  7.71 (d,  $J = 2.1$  Hz, 1H), 7.48 – 7.44 (m, 2H), 7.37 – 7.30 (m, 3H), 7.27 – 7.21 (m, 1H), 7.10 (d,  $J = 8.5$  Hz, 1H), 6.96 (s, 2H), 5.23 (s, 2H), 3.51 (s, 3H).

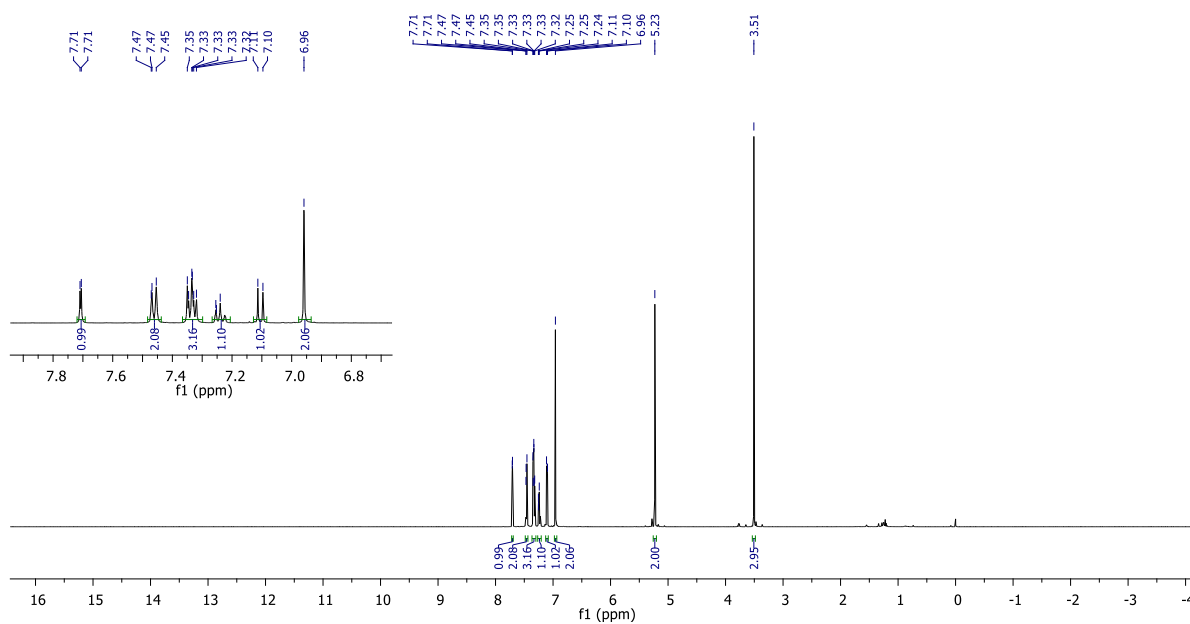

$^{13}\text{C}$  NMR (126 MHz,  $\text{CDCl}_3$ )  $\delta$  153.18, 137.11, 132.89, 131.06, 128.75, 128.47, 127.73, 126.75, 126.70, 126.49, 116.13, 113.26, 95.14, 56.45.

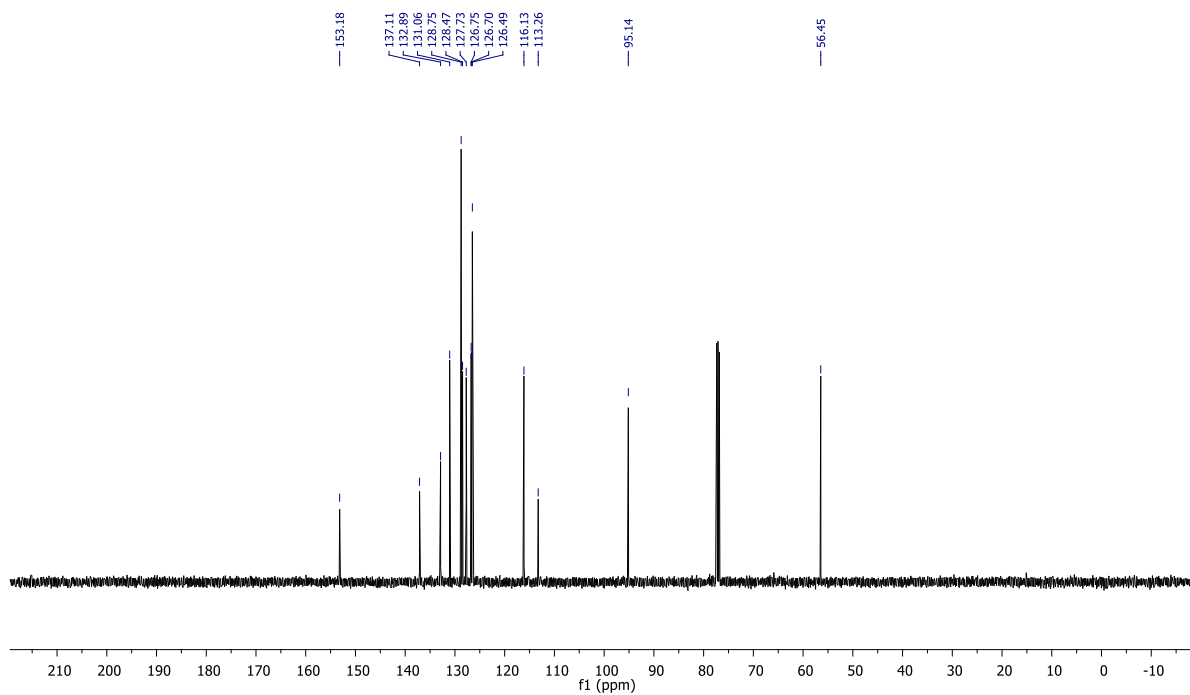



## Compound 6

$^1\text{H}$  NMR (500 MHz,  $\text{CDCl}_3$ )  $\delta$  7.75 (d,  $J = 1.7$  Hz, 1H), 7.49 (dd,  $J = 8.6, 1.7$  Hz, 1H), 6.78 (d,  $J = 8.6$  Hz, 1H), 4.53 (s, 1H).

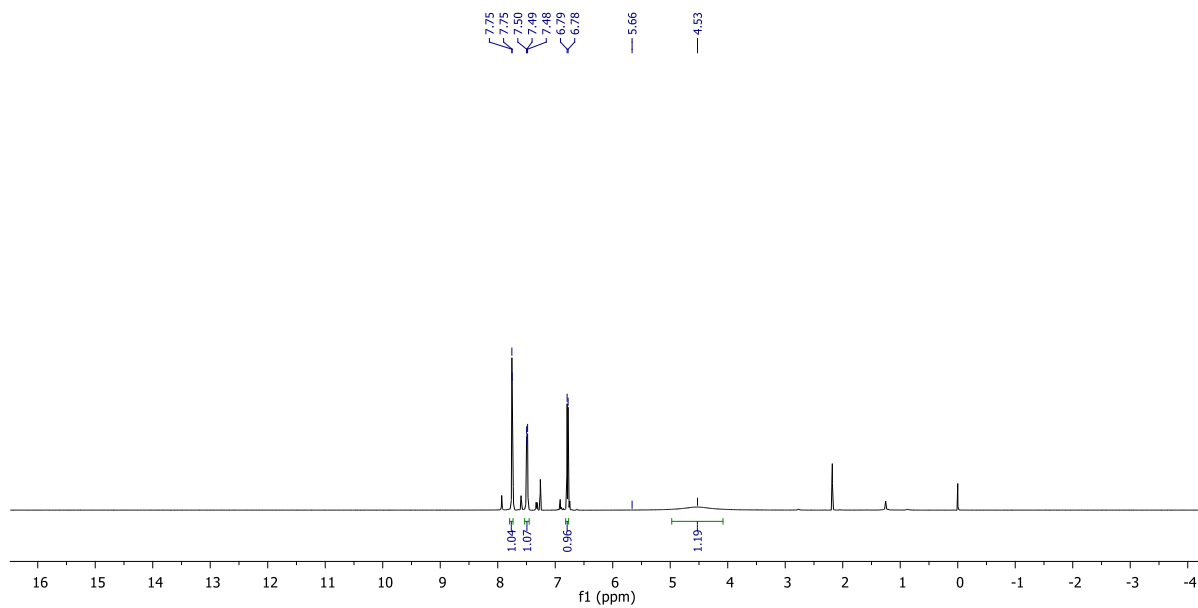

$^{13}\text{C}$  NMR (126 MHz,  $\text{CDCl}_3$ )  $\delta$  152.34, 139.64, 138.04, 118.12, 111.34, 82.02.

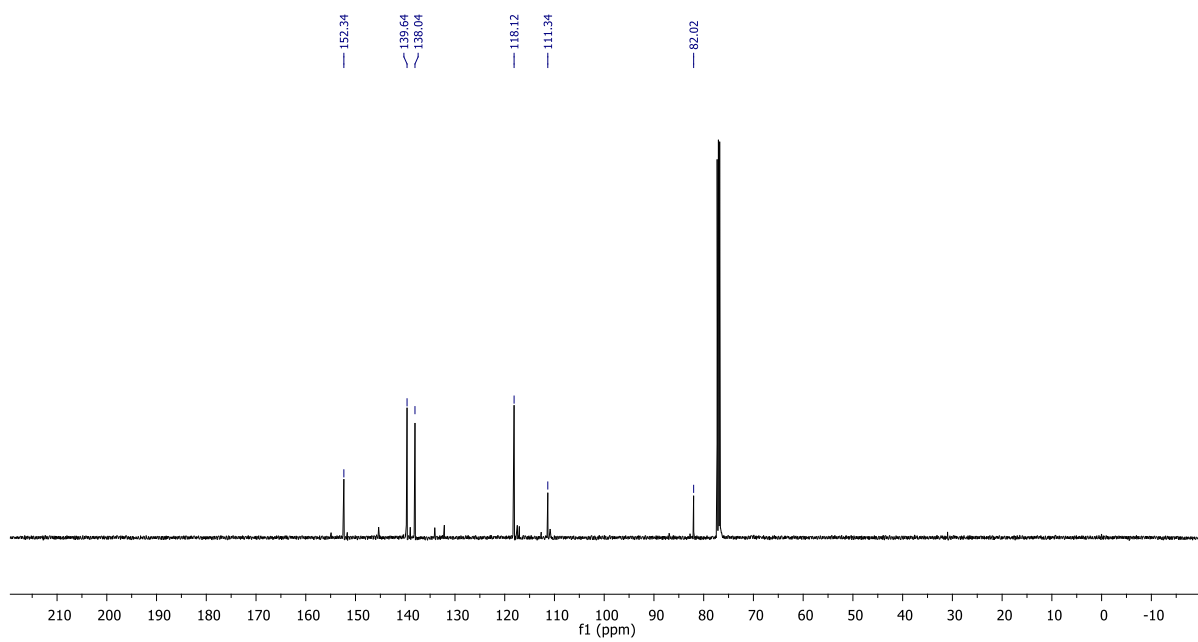

## Compound 7a

$^1\text{H}$  NMR (500 MHz,  $\text{CDCl}_3$ )  $\delta$  7.82 (d,  $J = 2.1$  Hz, 1H), 7.54 (dd,  $J = 8.7, 2.1$  Hz, 1H), 6.65 (d,  $J = 8.6$  Hz, 1H), 3.87 (s, 3H).

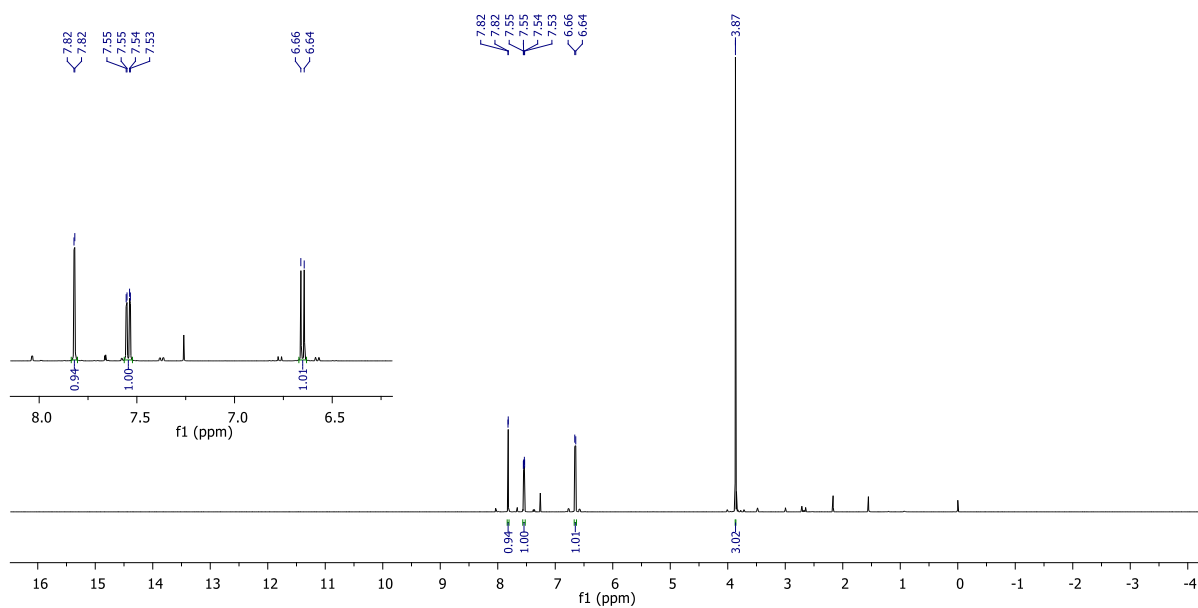

$^{13}\text{C}$  NMR (126 MHz,  $\text{CDCl}_3$ )  $\delta$  155.98, 140.99, 137.27, 113.84, 112.96, 82.44, 56.31.

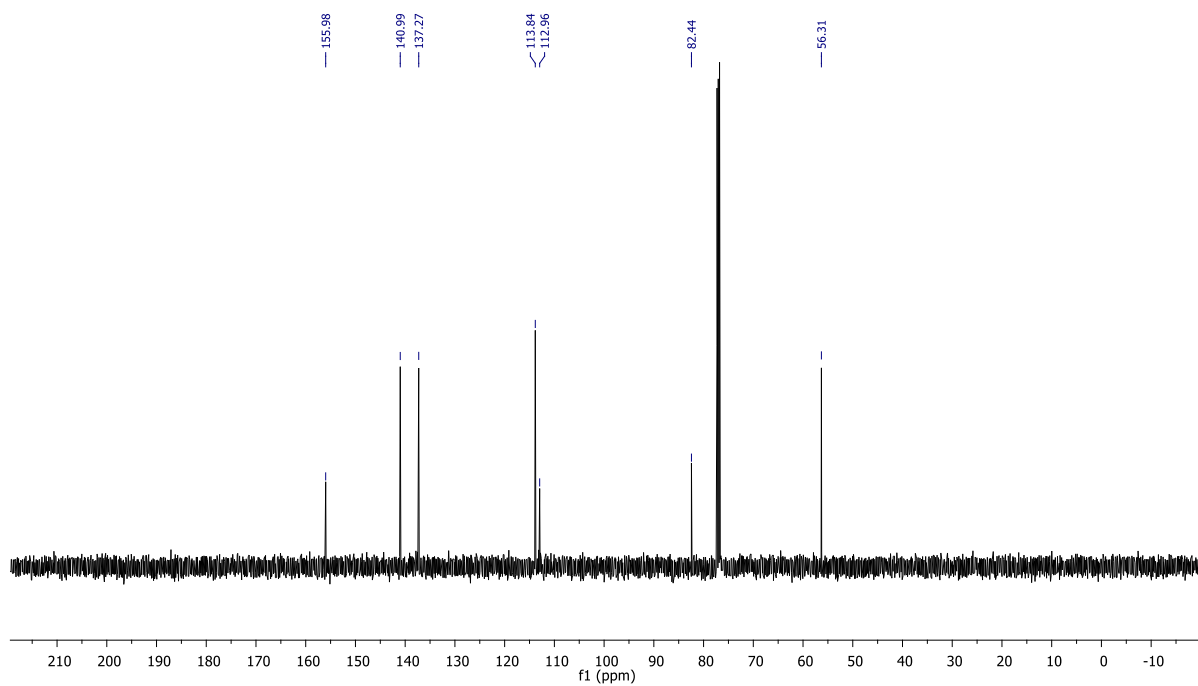

## Compound 7b

$^1\text{H}$  NMR (500 MHz,  $\text{CDCl}_3$ )  $\delta$  7.84 (d,  $J = 2.1$  Hz, 1H), 7.52 (dd,  $J = 8.7, 2.1$  Hz, 1H), 6.91 (d,  $J = 8.7$  Hz, 1H), 5.22 (s, 2H), 3.50 (s, 3H).

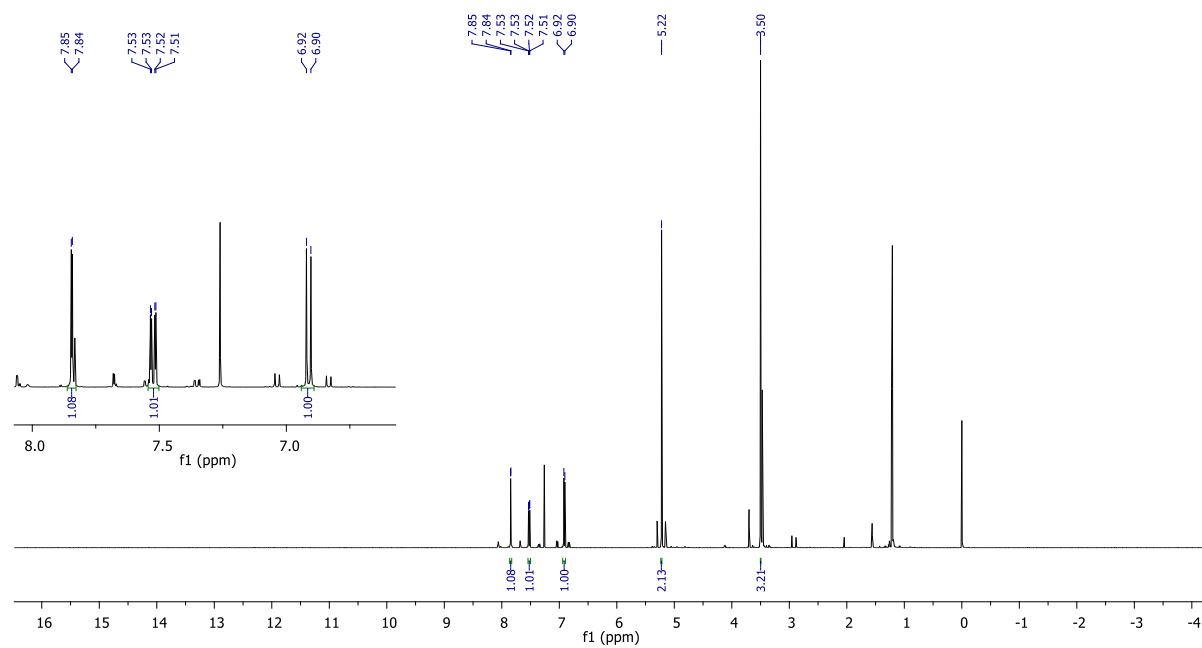

$^{13}\text{C}$  NMR (126 MHz,  $\text{CDCl}_3$ )  $\delta$  153.85, 141.12, 137.29, 117.87, 114.06, 95.06, 84.21, 56.45.

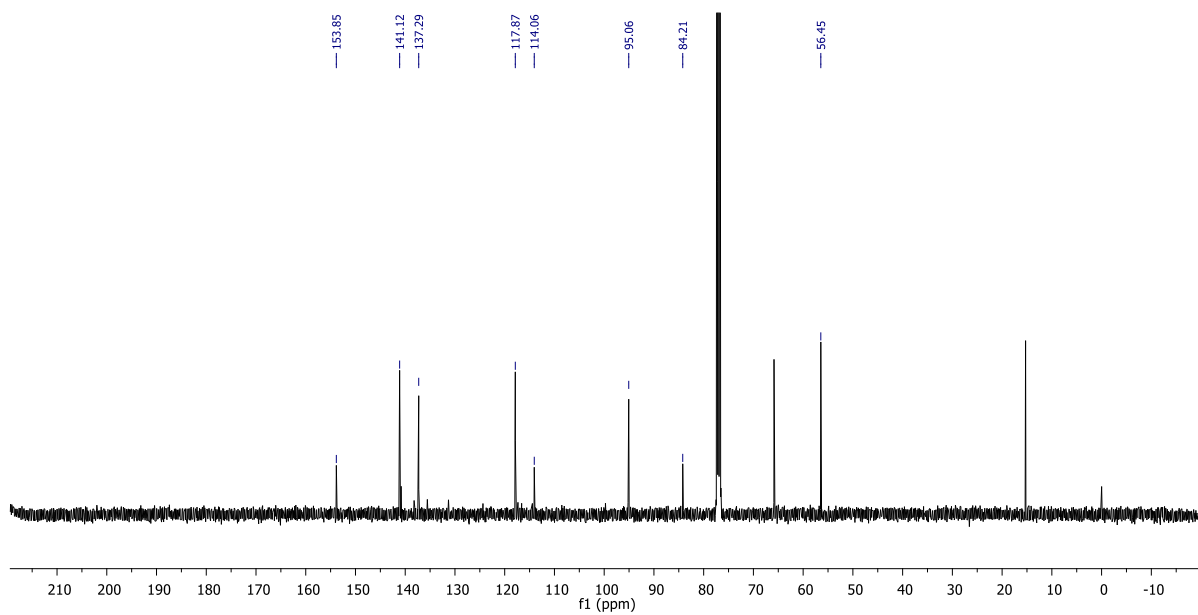

## Compound 8

$^1\text{H}$  NMR (500 MHz,  $\text{CDCl}_3$ )  $\delta$  7.74 (d,  $J = 2.1$  Hz, 1H), 7.52 – 7.49 (m, 2H), 7.45 (dd,  $J = 8.5, 2.0$  Hz, 1H), 7.36 – 7.32 (m, 3H), 6.87 (d,  $J = 8.5$  Hz, 1H), 3.92 (s, 3H).

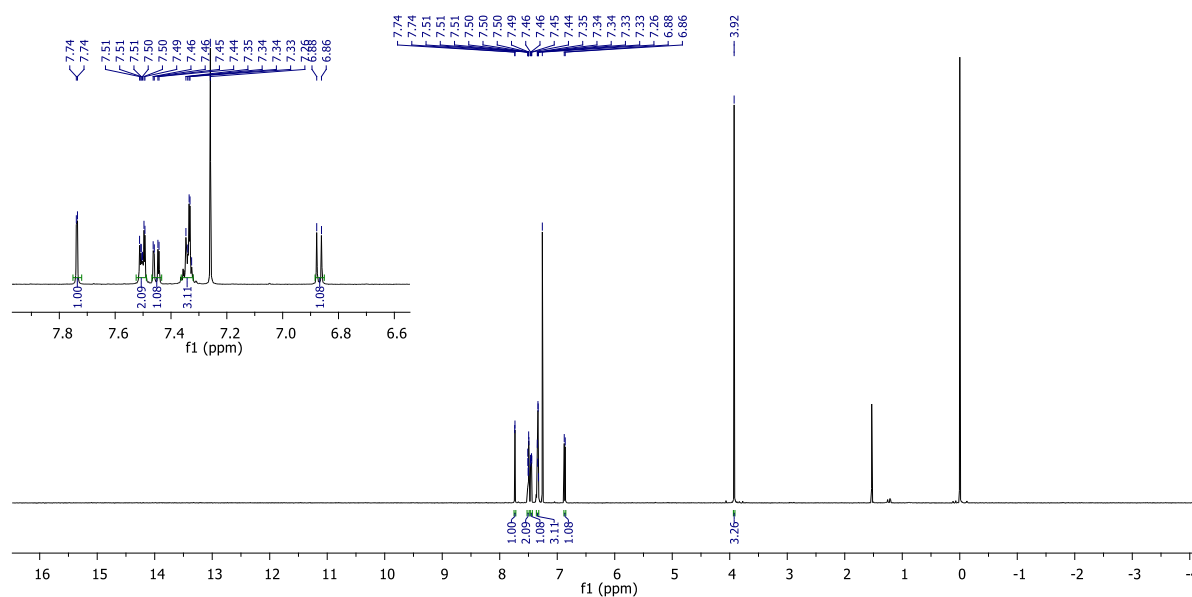

$^{13}\text{C}$  NMR (126 MHz,  $\text{CDCl}_3$ )  $\delta$  156.03, 136.29, 132.00, 131.52, 128.37, 128.26, 123.14, 116.89, 111.57, 111.43, 89.07, 87.81, 56.31.

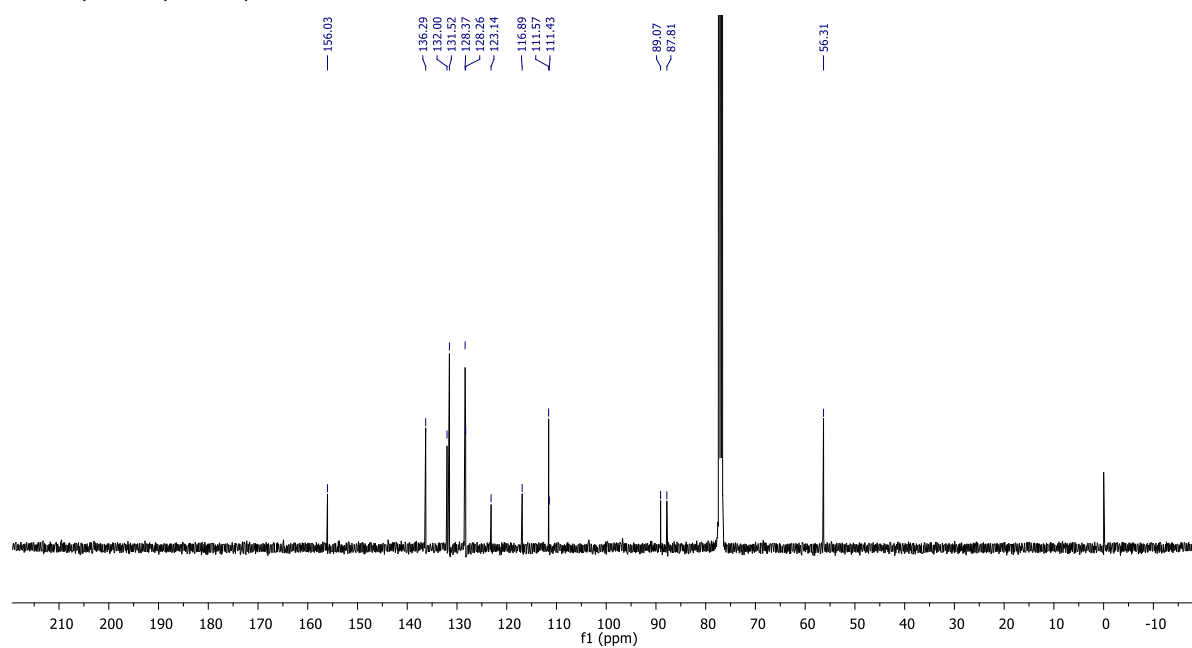

## Compound 9

$^1\text{H}$  NMR (500 MHz,  $\text{CDCl}_3$ )  $\delta$  7.43 (d,  $J = 2.0$  Hz, 1H), 7.26 – 7.18 (m, 5H), 7.13 (dd,  $J = 8.6, 2.1$  Hz, 1H), 6.72 (d,  $J = 8.5$  Hz, 1H), 6.55 (d,  $J = 12.2$  Hz, 1H), 6.45 (d,  $J = 12.2$  Hz, 1H), 3.85 (s, 3H).

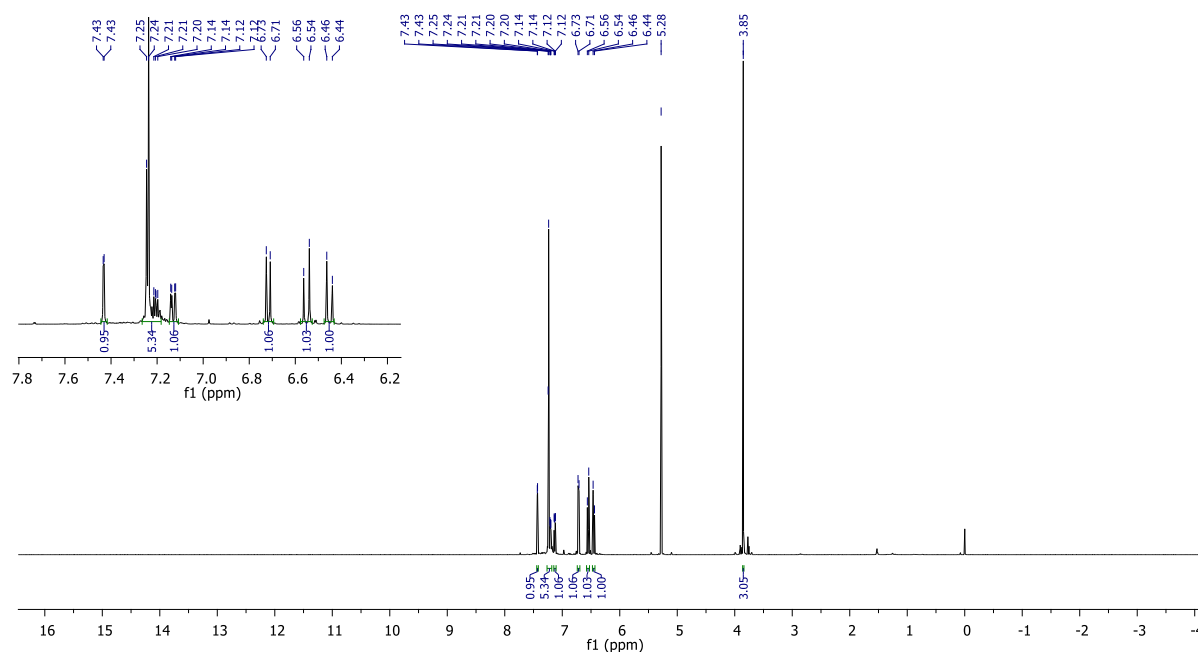

$^{13}\text{C}$  NMR (126 MHz,  $\text{CDCl}_3$ )  $\delta$  154.91, 137.07, 133.78, 131.15, 130.12, 129.09, 128.84, 128.40, 128.37, 127.31, 111.54, 111.31, 56.21.

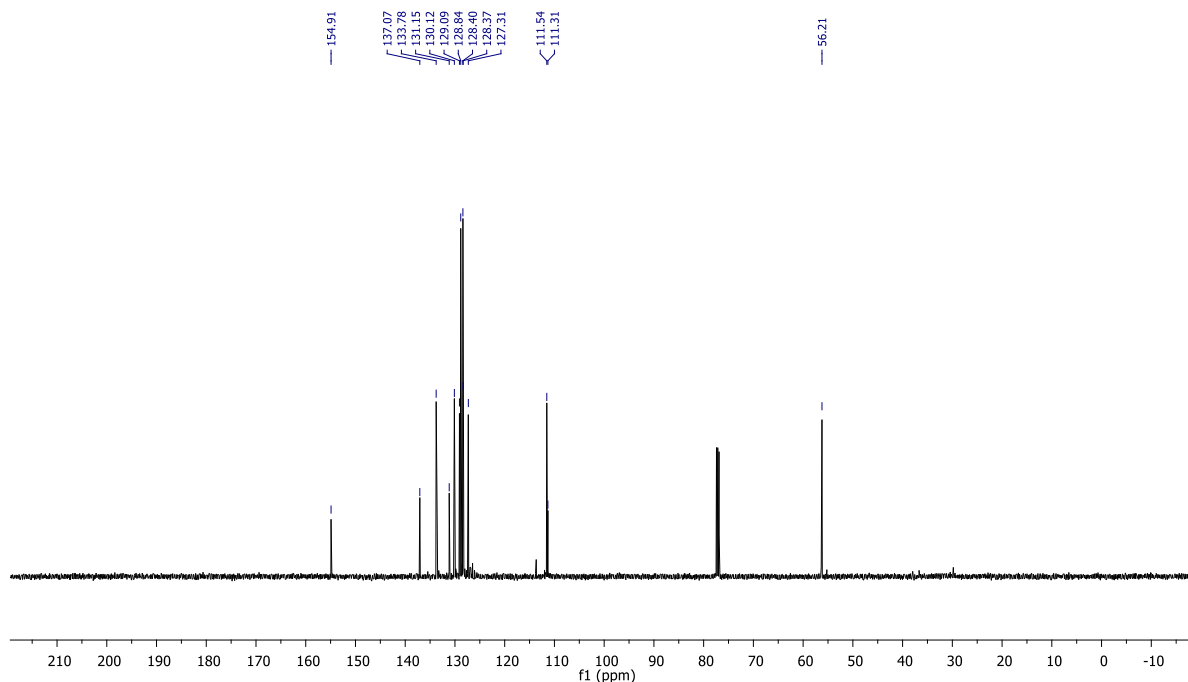

## Compound 10

$^1\text{H}$  NMR (500 MHz,  $\text{CDCl}_3$ )  $\delta$  7.81 (s, 1H), 7.79 (d,  $J = 2.2$  Hz, 1H), 7.72 (dd,  $J = 12.9, 7.6$  Hz, 3H), 7.51 (dd,  $J = 8.5, 1.8$  Hz, 1H), 7.44 (dd,  $J = 8.5, 2.2$  Hz, 1H), 7.39 – 7.32 (m, 2H), 6.80 (d,  $J = 8.5$  Hz, 1H), 3.77 (s, 3H).

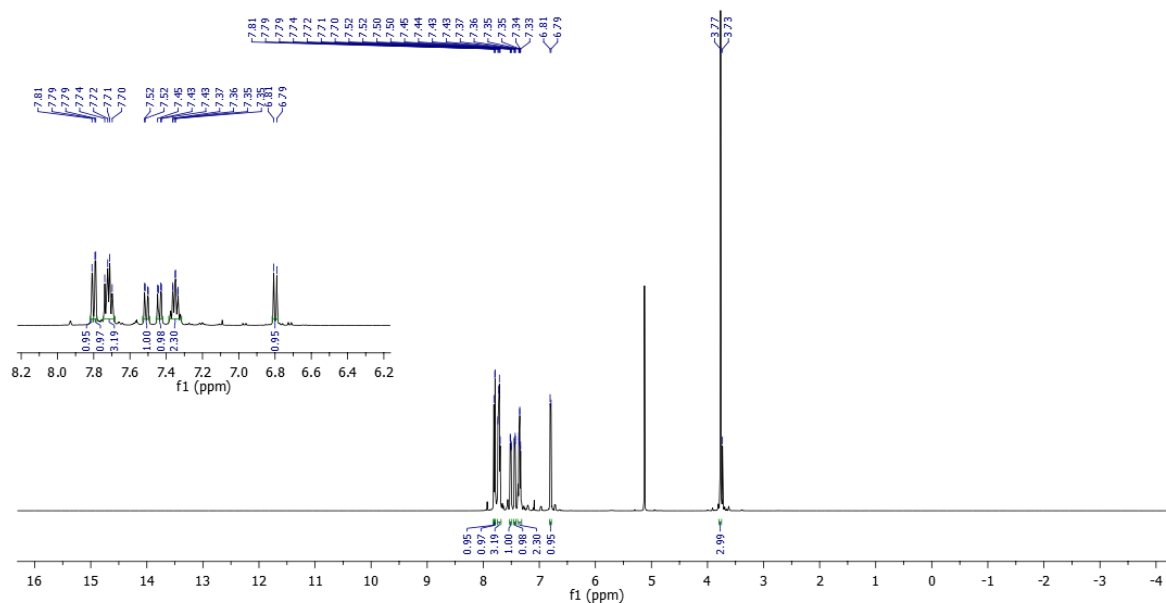

$^{13}\text{C}$  NMR (126 MHz,  $\text{CDCl}_3$ )  $\delta$  155.42, 136.73, 135.02, 133.72, 132.57, 132.12, 128.61, 128.19, 127.71, 127.34, 126.46, 126.03, 125.30, 125.13, 112.22, 56.37 (one carbon peak is not visible)

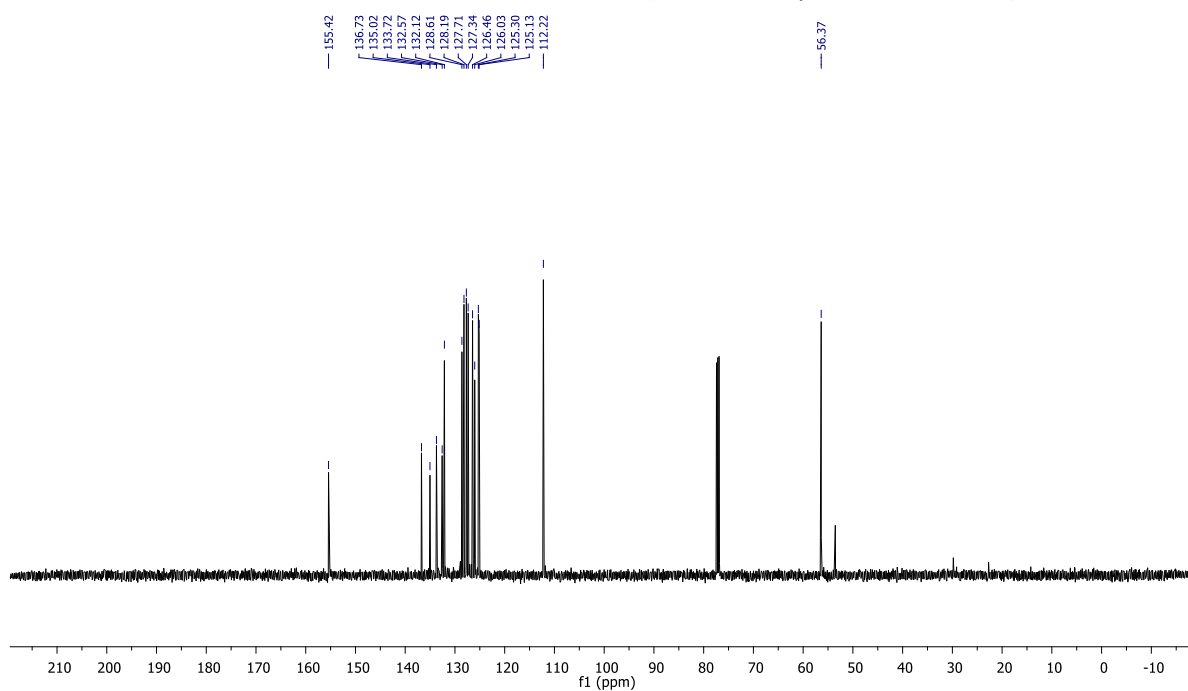

## Compound 11

$^1\text{H}$  NMR (500 MHz,  $\text{CDCl}_3$ )  $\delta$  7.85 – 7.67 (m, 15H), 3.22 (d,  $J = 13.2$  Hz, 3H).

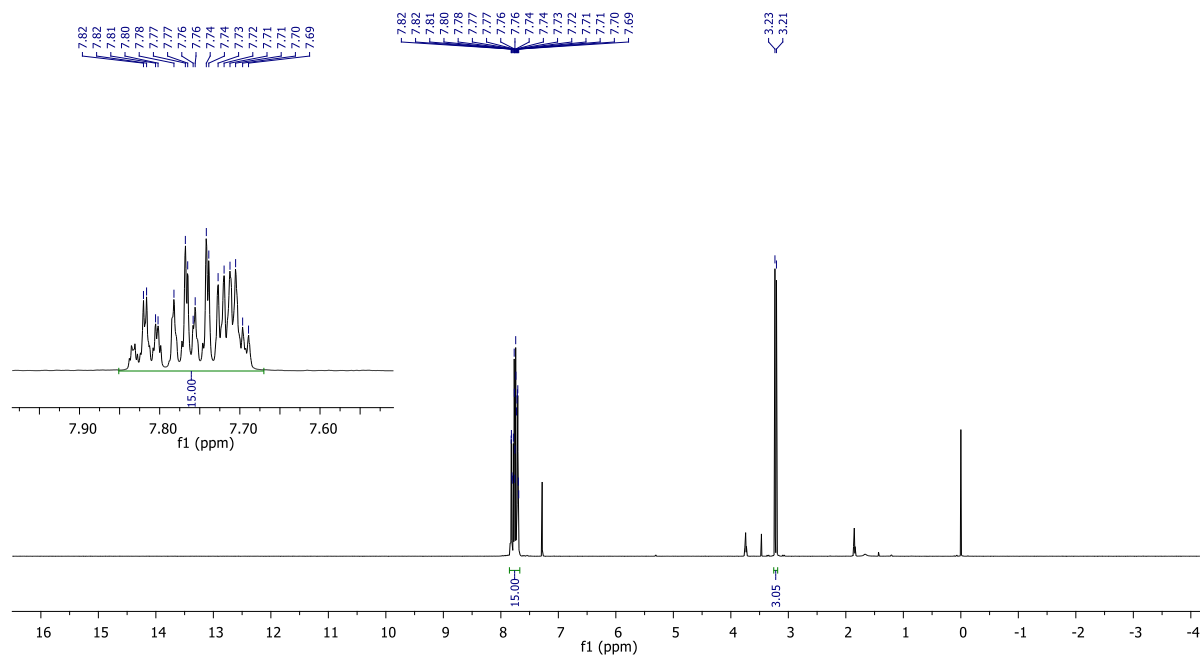

## Compound 12

$^1\text{H}$  NMR (500 MHz,  $\text{CDCl}_3$ )  $\delta$  7.61 (d,  $J = 2.1$  Hz, 1H), 7.27 (dd,  $J = 8.5, 2.1$  Hz, 1H), 7.10 (d,  $J = 8.5$  Hz, 1H), 6.60 (dd,  $J = 17.6, 10.9$  Hz, 1H), 5.64 (d,  $J = 17.3$  Hz, 1H), 5.24 (s, 2H), 5.20 (d,  $J = 10.7$  Hz, 1H), 3.52 (s, 3H).

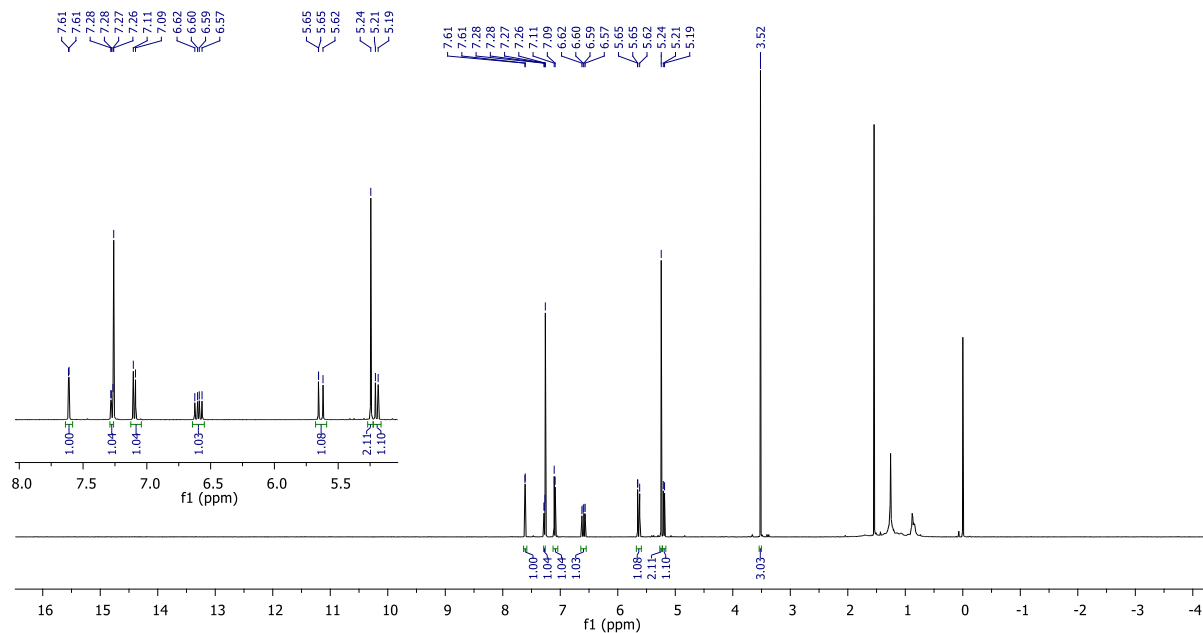

$^{13}\text{C}$  NMR (126 MHz,  $\text{CDCl}_3$ )  $\delta$  153.29, 134.95, 133.10, 130.91, 126.38, 115.97, 113.57, 113.05, 95.11, 56.39.

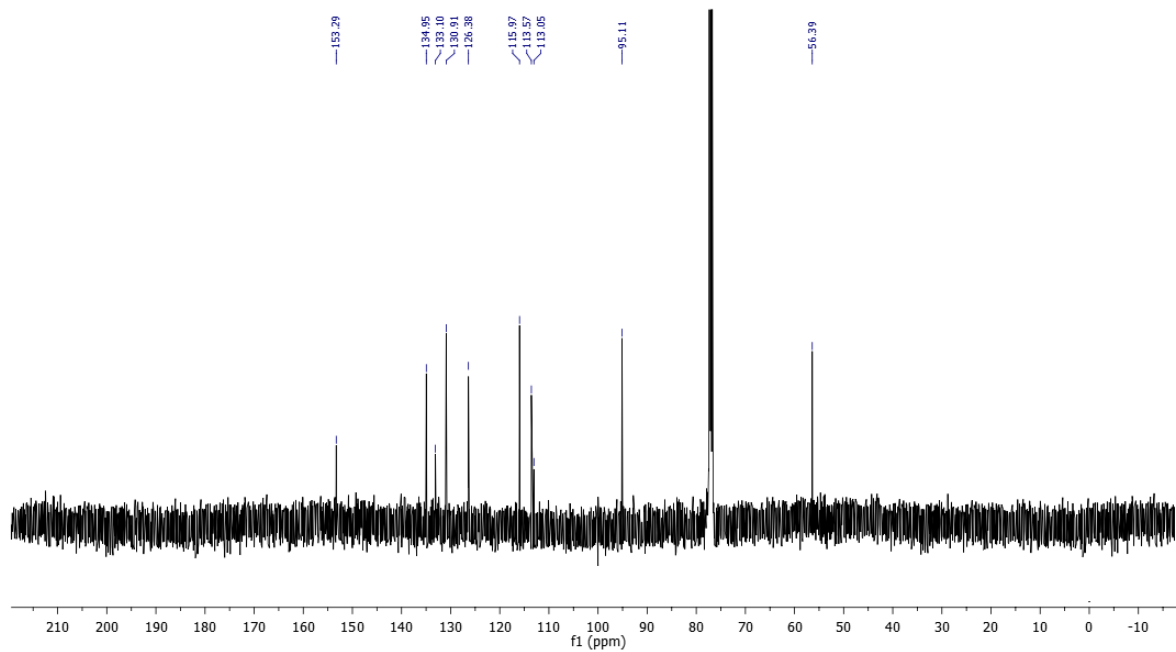



## Compound 13

$^1\text{H}$  NMR (500 MHz,  $\text{CDCl}_3$ )  $\delta$  3.36 (s, 3H), 5.07 (s, 2H), 6.65 – 6.77 (m, 2H), 6.82 – 6.91 (m, 3H), 6.95 (d, 1H), 7.14 (dd, 1H), 7.21 – 7.27 (m, 2H), 7.53 (d, 1H).

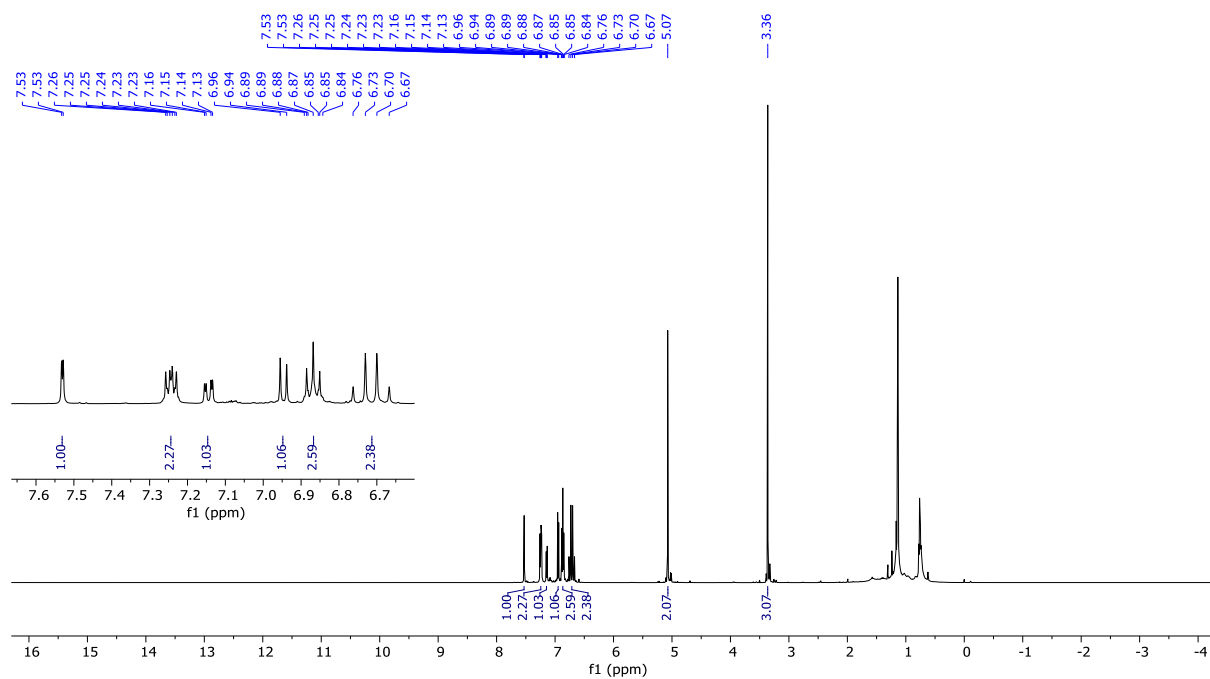

$^{13}\text{C}$  NMR (126 MHz,  $\text{CDCl}_3$ )  $\delta$  162.38 (d,  $J = 247.1$  Hz), 153.26, 133.32 (d,  $J = 3.4$  Hz), 132.68, 131.01, 127.97 (d,  $J = 7.8$  Hz), 127.17, 126.67, 126.47 (d,  $J = 2.3$  Hz), 116.07, 115.67 (d,  $J = 21.8$  Hz), 113.28, 95.09, 56.36.

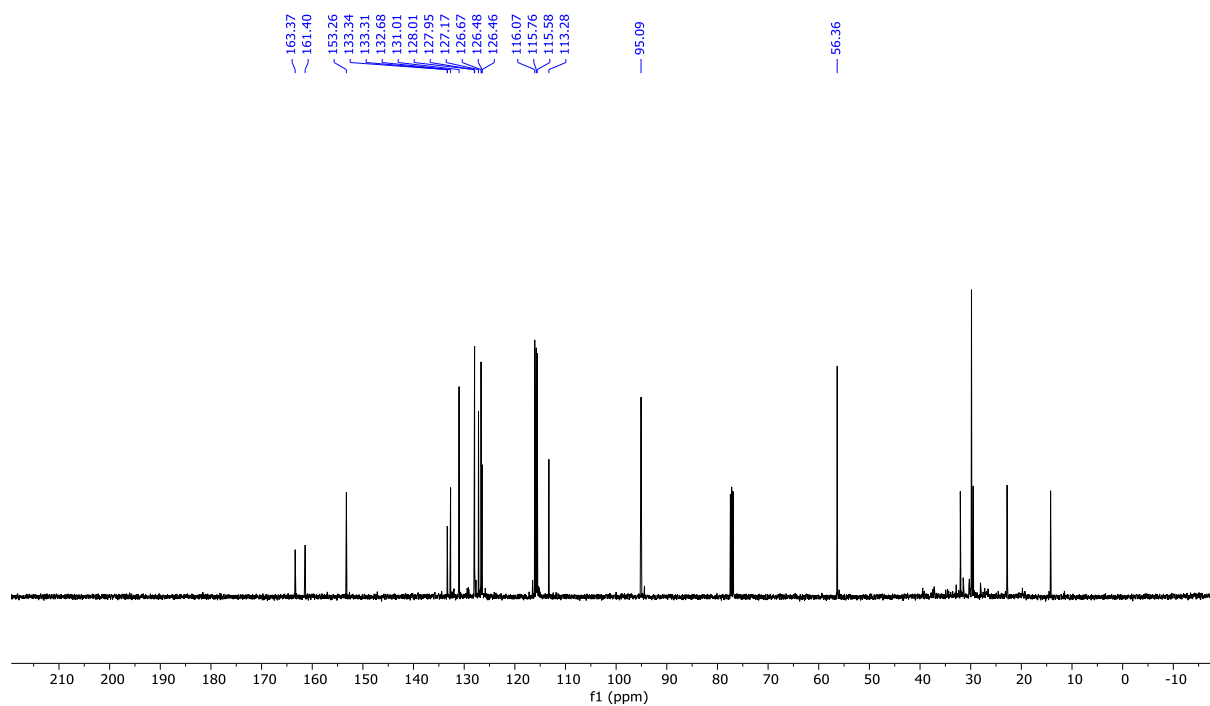

## Compound 14

$^1\text{H}$  NMR (500 MHz,  $\text{CDCl}_3$ )  $\delta$  7.38 – 7.30 (m, 2H), 7.24 – 7.17 (m, 2H), 6.67 (dd,  $J = 17.6, 10.9$  Hz, 1H), 5.70 (dd,  $J = 17.6, 0.7$  Hz, 1H), 5.21 (dd,  $J = 10.9, 0.7$  Hz, 1H), 2.48 (s, 3H).

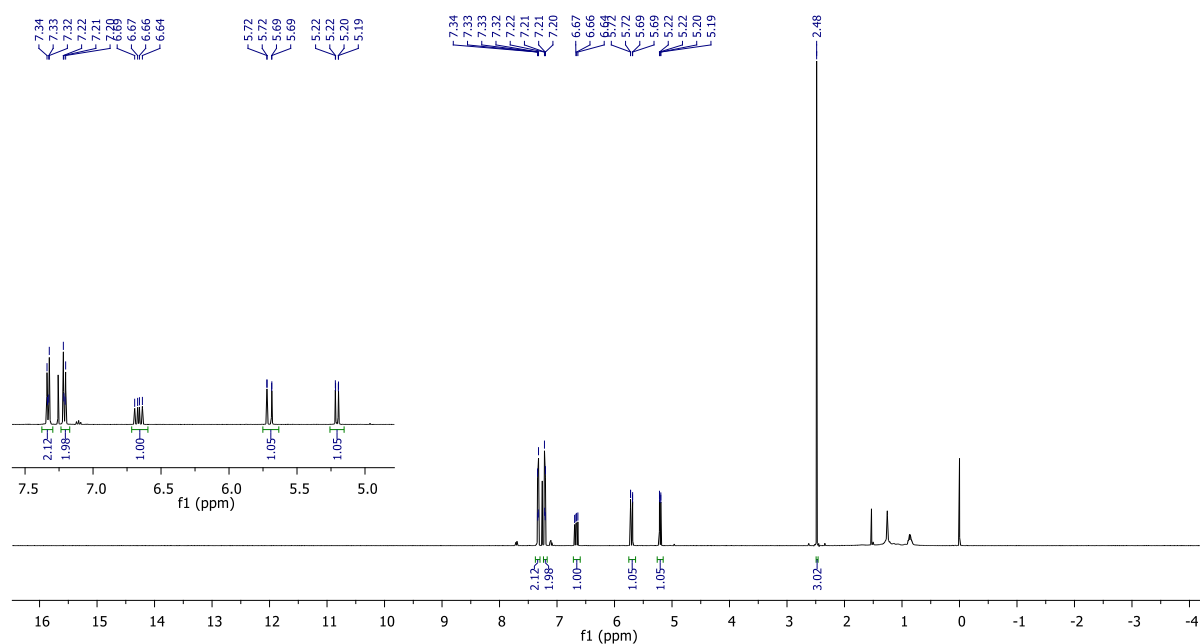

$^{13}\text{C}$  NMR (126 MHz,  $\text{CDCl}_3$ )  $\delta$  138.00, 136.20, 134.59, 126.63 (4C), 113.23, 15.86.

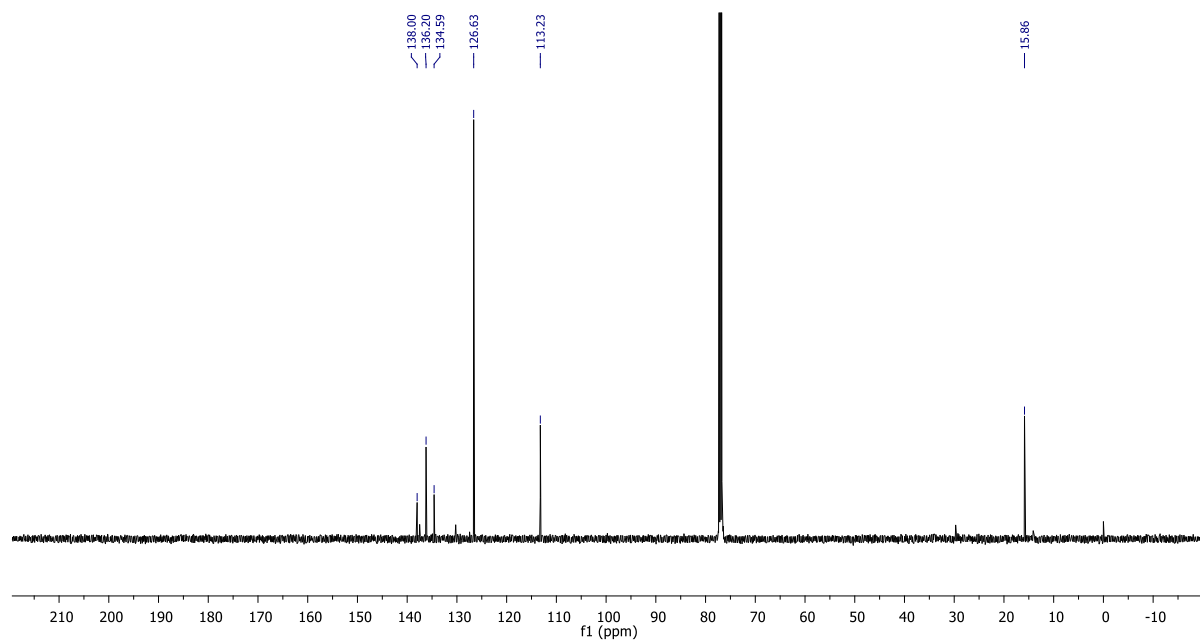

## Compound 15

$^1\text{H}$  NMR (500 MHz,  $\text{CDCl}_3$ )  $\delta$  7.68 (d,  $J = 2.1$  Hz, 1H), 7.39 – 7.34 (m, 2H), 7.31 (dd,  $J = 8.6, 2.1$  Hz, 1H), 7.22 – 7.17 (m, 2H), 7.09 (d,  $J = 8.5$  Hz, 1H), 6.89 (s, 2H), 5.22 (s, 2H), 3.50 (s, 3H), 2.46 (s, 3H).

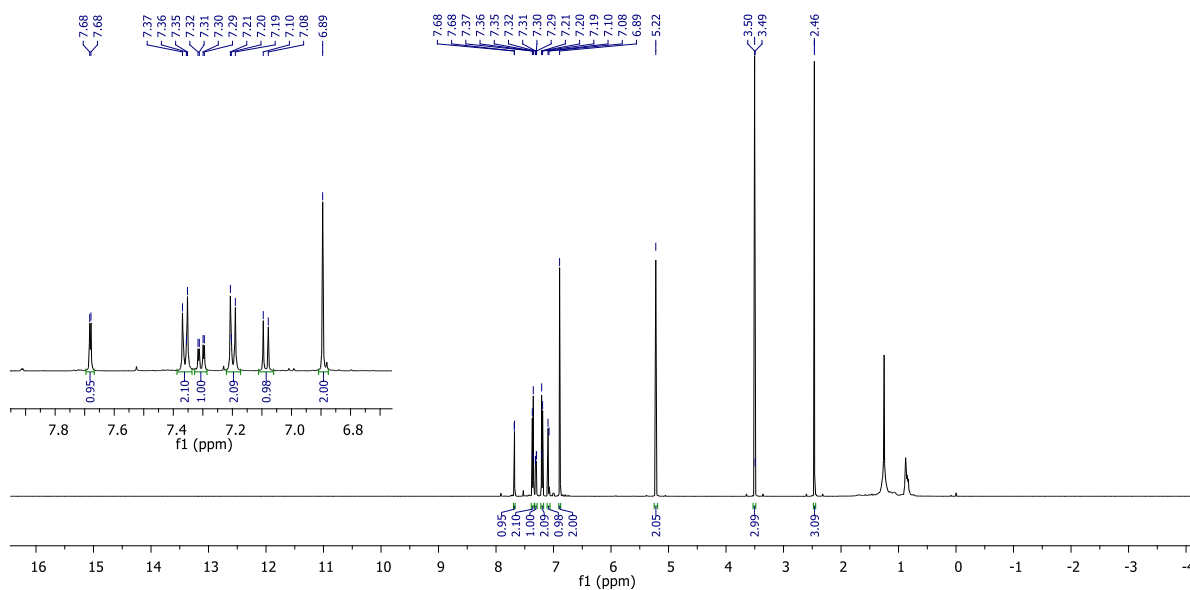

$^{13}\text{C}$  NMR (126 MHz,  $\text{CDCl}_3$ )  $\delta$  153.11, 138.03, 134.01, 132.89, 130.95, 127.79, 126.86, 126.67, 126.64, 126.03, 116.12, 113.26, 95.13, 56.43, 15.77.

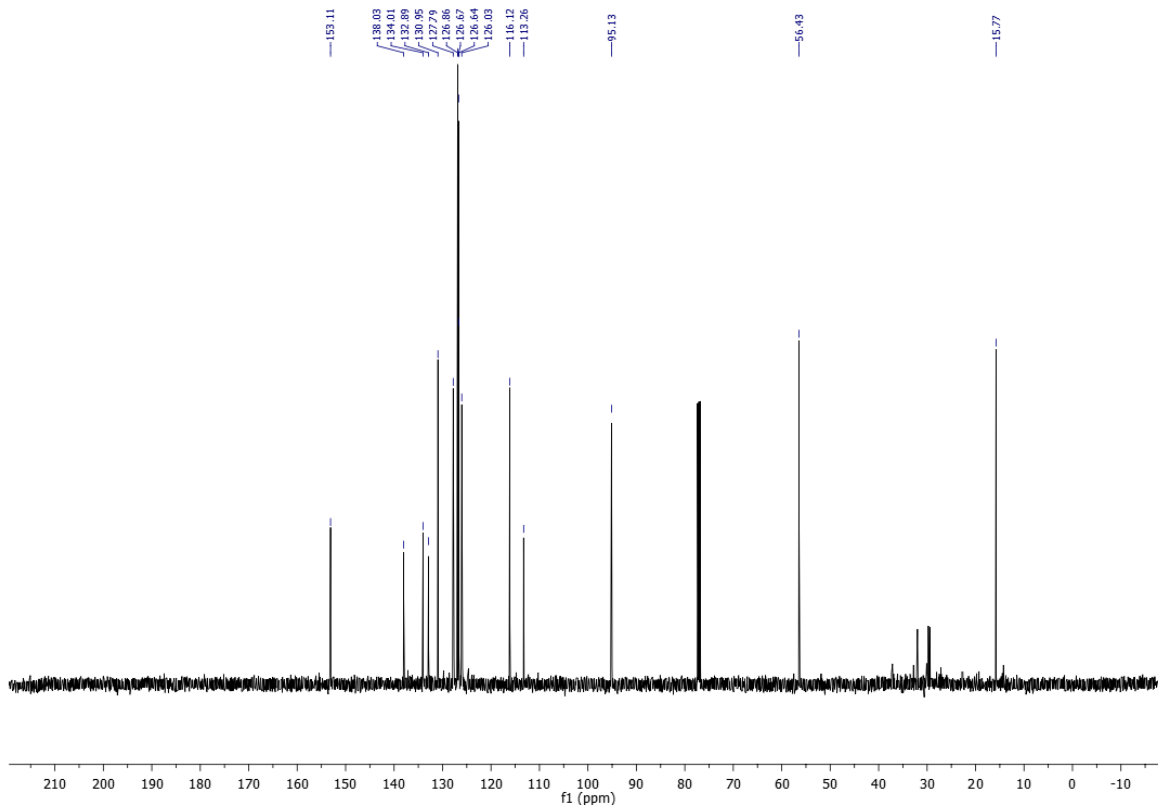

## Compound 16

$^1\text{H}$  NMR (500 MHz,  $\text{CDCl}_3$ )  $\delta$  7.74 (d,  $J = 2.1$  Hz, 1H), 7.63 – 7.52 (m, 6H), 7.44 (dd,  $J = 10.6, 4.8$  Hz, 2H), 7.38 (dd,  $J = 8.5, 2.2$  Hz, 1H), 7.37 – 7.32 (m, 1H), 7.14 (d,  $J = 8.5$  Hz, 1H), 7.02 (s, 2H), 5.26 (s, 2H), 3.53 (s, 3H).

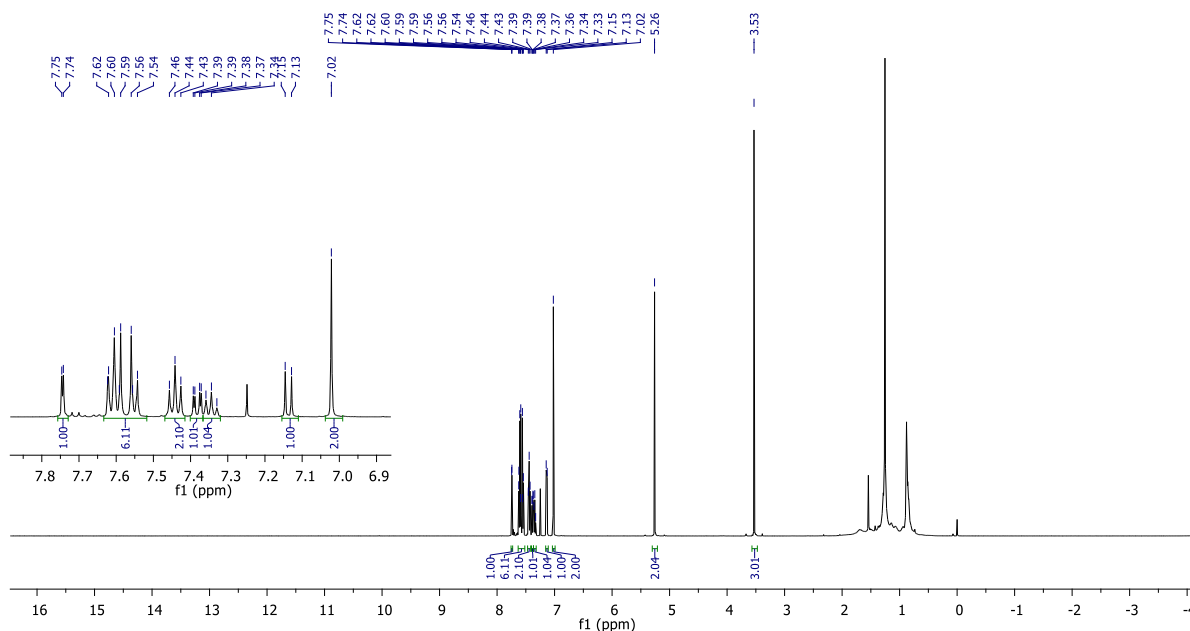

$^{13}\text{C}$  NMR (126 MHz,  $\text{CDCl}_3$ )  $\delta$  153.20, 140.64, 140.42, 136.15, 132.89, 131.05, 128.83, 127.96, 127.39, 127.37, 126.93, 126.89, 126.74, 126.73, 116.14, 113.28, 95.14, 56.43.

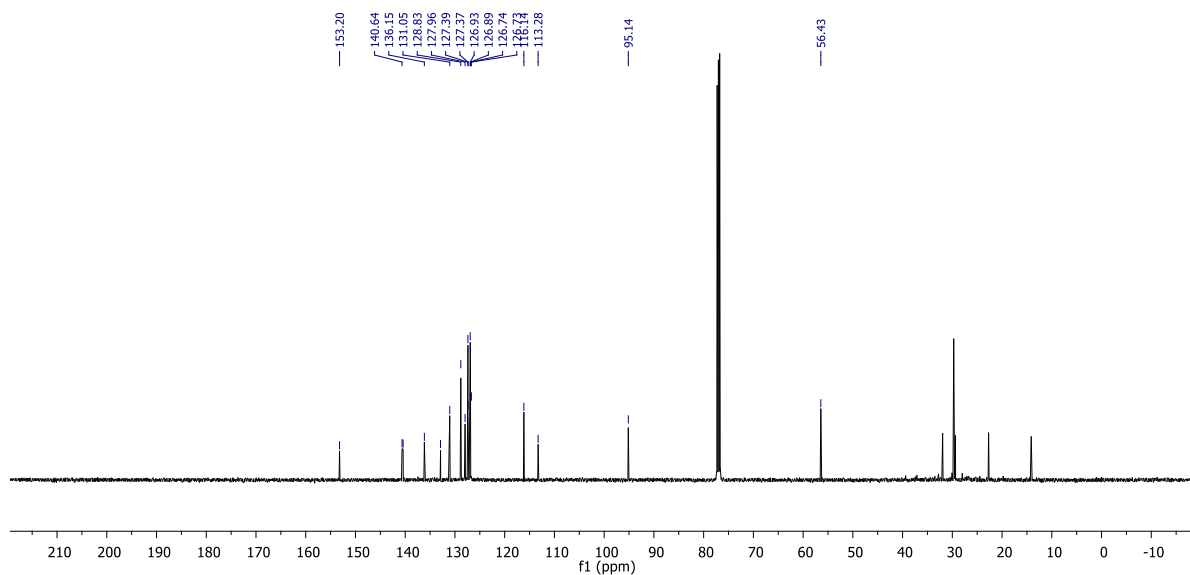



## Compound 18

$^1\text{H}$  NMR (500 MHz,  $\text{CDCl}_3$ )  $\delta$  7.79 (d,  $J = 8.5$  Hz, 2H), 7.45 (d,  $J = 8.5$  Hz, 2H), 7.27 (t,  $J = 7.6$  Hz, 2H), 7.15 (t,  $J = 7.6$  Hz, 1H), 7.06 (d,  $J = 7.6$  Hz, 2H), 6.59 (s, 1H).

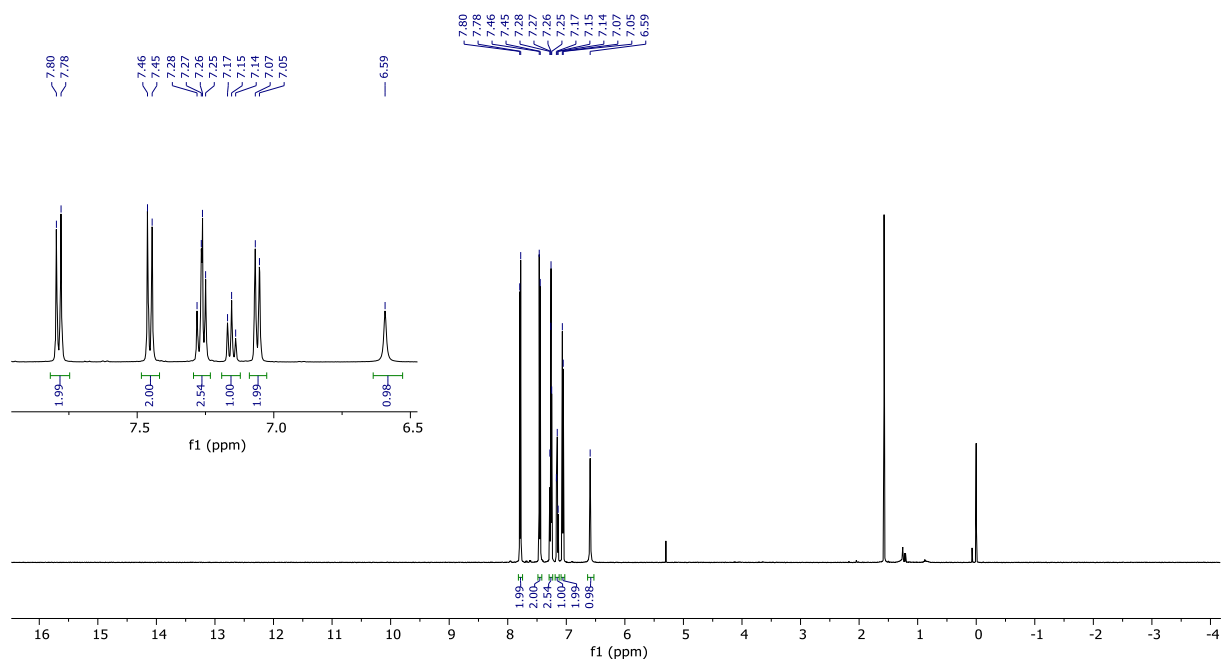

$^{13}\text{C}$  NMR (126 MHz,  $\text{CDCl}_3$ )  $\delta$  138.67, 138.34, 136.02, 129.51, 128.60, 125.84, 121.90, 100.68.

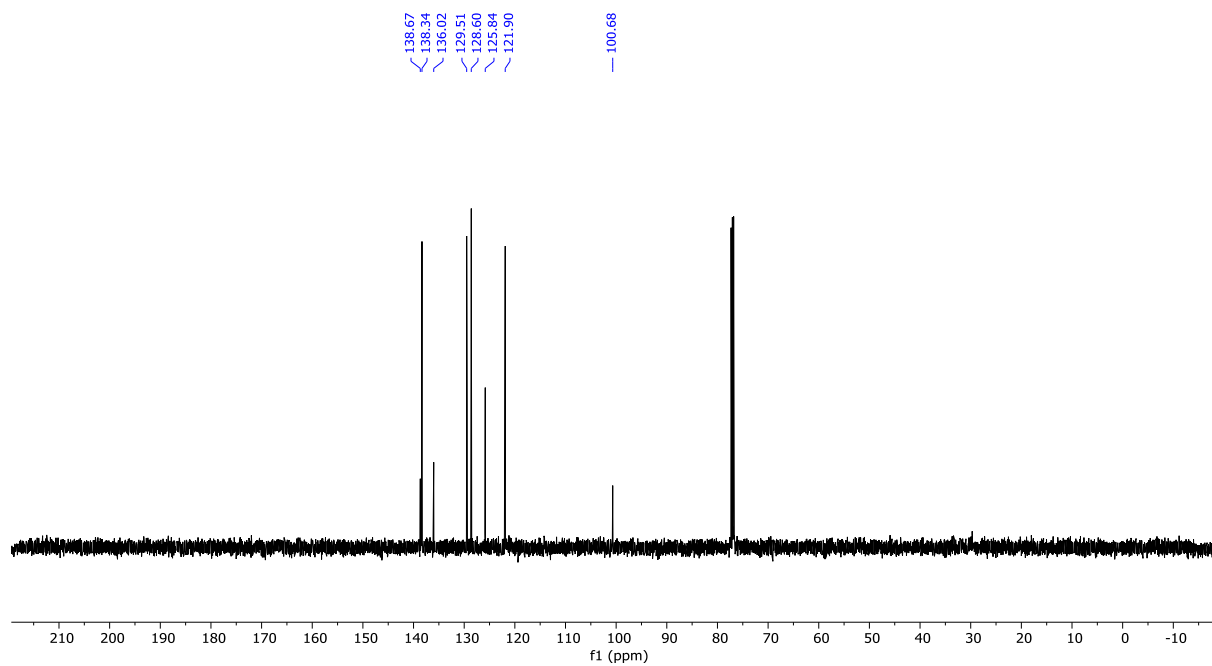

## Compound 19

$^1\text{H}$  NMR (500 MHz,  $\text{CDCl}_3$ )  $\delta$  7.77 (d,  $J = 8.5$  Hz, 2H), 7.66 (d,  $J = 2.1$  Hz, 1H), 7.62 (s, 1H), 7.42 (d,  $J = 8.5$  Hz, 2H), 7.29 (dd,  $J = 2.1, 8.6$  Hz, 1H), 7.18 – 7.23 (m, 2H), 7.12 – 7.17 (m, 2H), 7.03 – 7.12 (m, 2H), 6.96 (d,  $J = 16.3$  Hz, 1H), 6.84 (d,  $J = 16.3$  Hz, 1H), 5.22 (s, 2H), 3.49 (s, 3H).

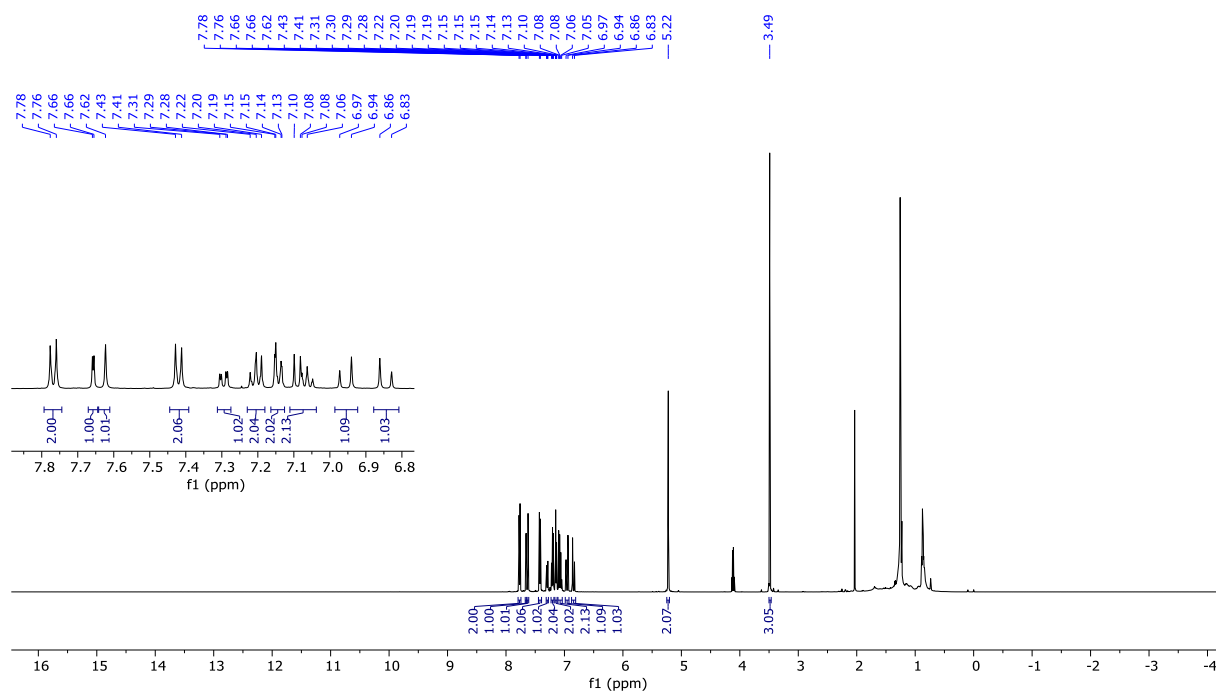

$^{13}\text{C}$  NMR (126 MHz,  $\text{CDCl}_3$ , 27°C)  $\delta$  153.84, 141.78, 137.37, 136.70, 131.80, 131.40, 130.14, 129.37, 127.79, 127.24, 126.72, 126.27, 125.30, 121.53, 116.02, 113.31, 95.04, 56.46.

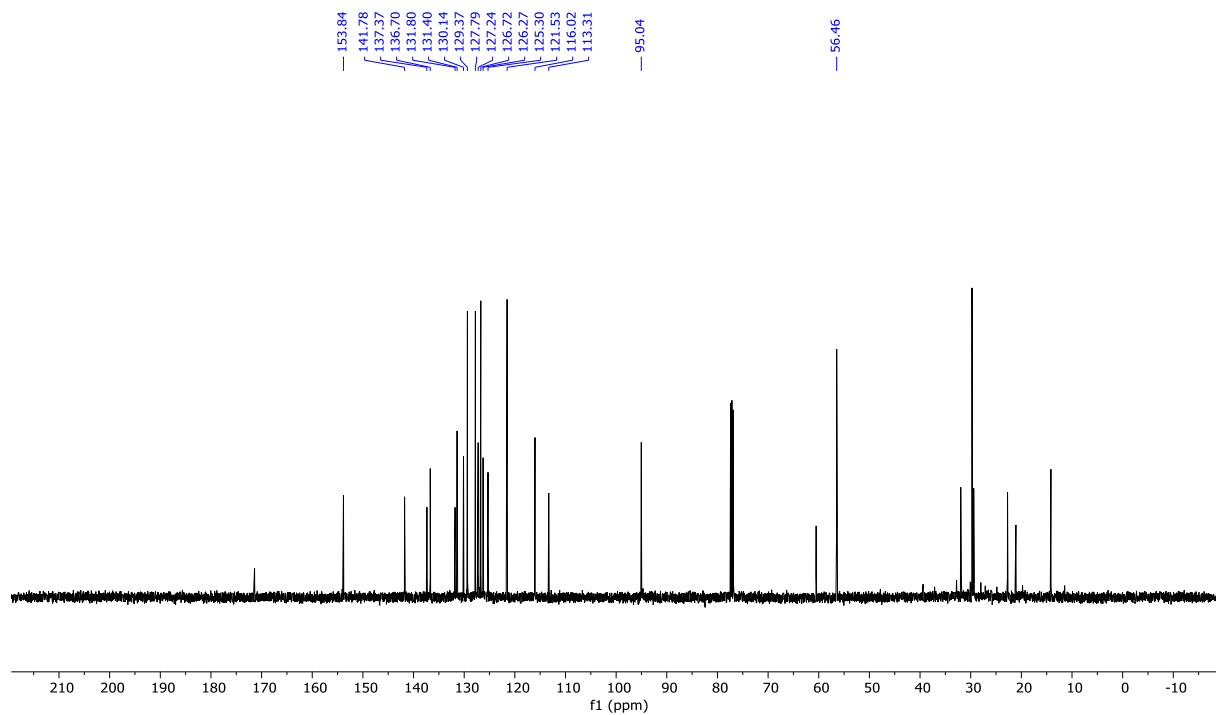

## Compound 20

$^1\text{H}$  NMR (500 MHz,  $\text{CDCl}_3$ )  $\delta$  7.84 (d,  $J = 2.2$  Hz, 1H), 7.78 (dd,  $J = 2.2, 8.9$  Hz, 1H), 7.03 (d,  $J = 8.9$  Hz, 1H), 5.28 (s, 2H), 3.51 (s, 3H).

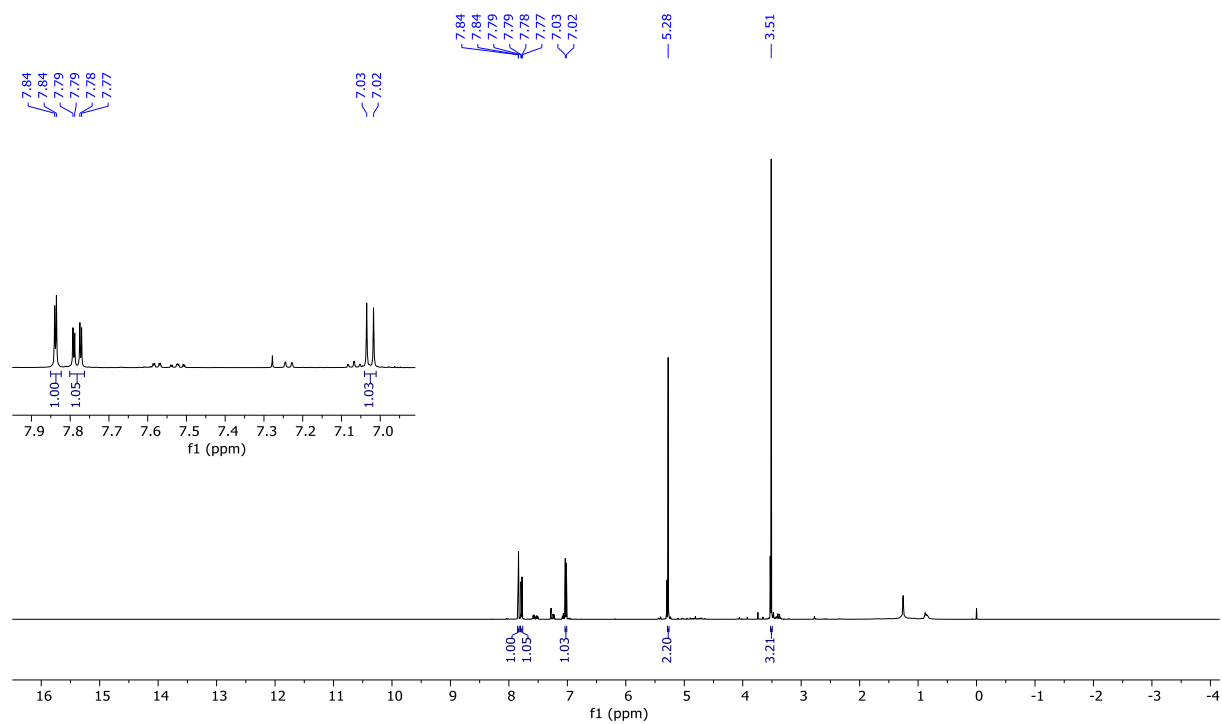

$^{13}\text{C}$  NMR (126 MHz,  $\text{CDCl}_3$ )  $\delta$  158.89, 143.03, 141.48, 117.02, 114.73, 105.14, 94.91, 82.89, 56.75.

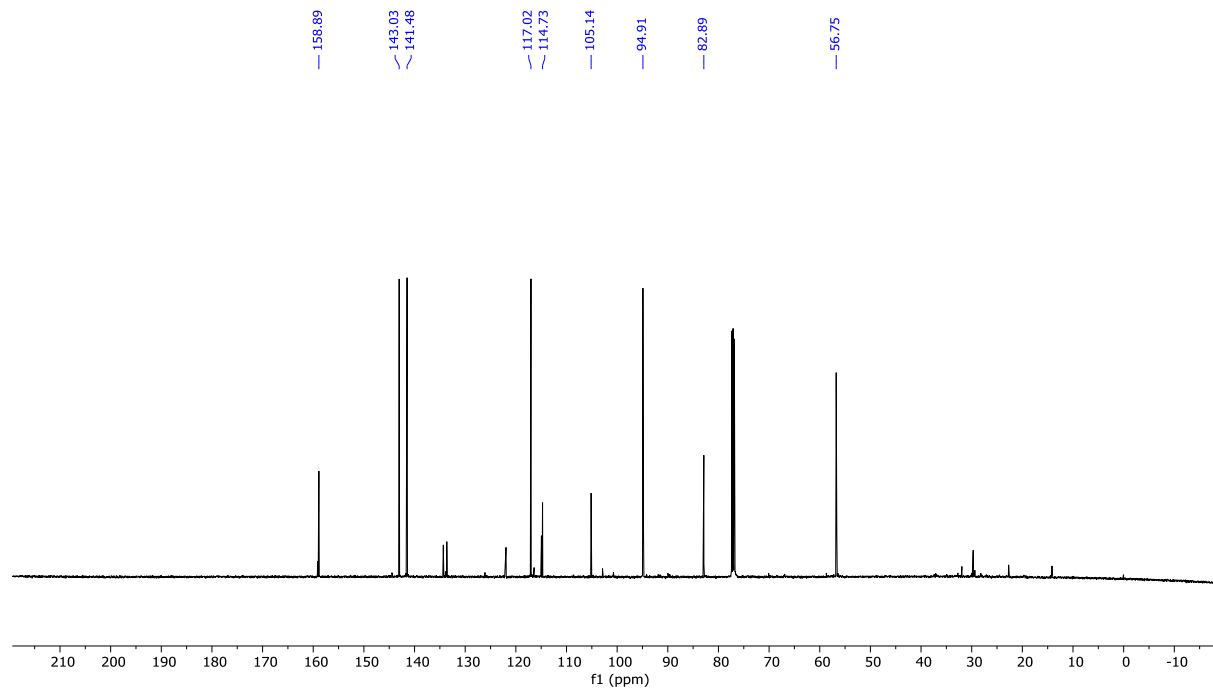



## Compound 21

$^1\text{H}$  NMR (500 MHz,  $\text{CDCl}_3$ )  $\delta$  7.46 (d,  $J = 2.3$  Hz, 1H), 7.43 (dd,  $J = 2.3, 8.8$  Hz, 1H), 7.08 (d,  $J = 8.8$  Hz, 1H), 6.50 (dd,  $J = 10.9, 17.6$  Hz, 1H), 5.56 (d,  $J = 17.5$  Hz, 1H), 5.14 – 5.18 (m, 4H), 3.40 (s, 3H).

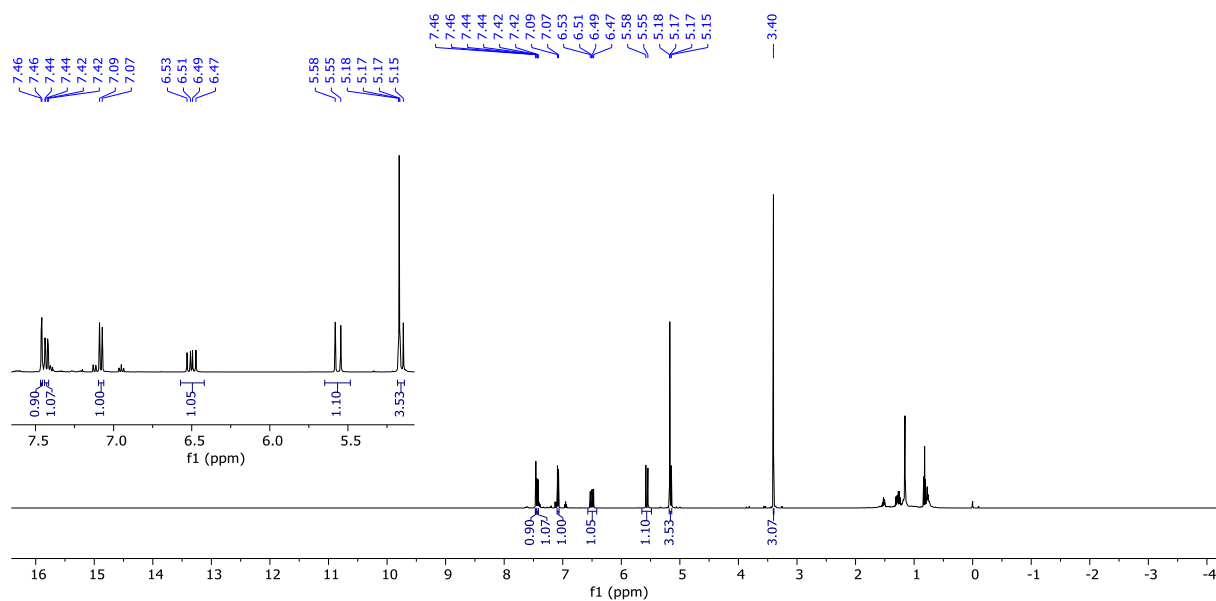

$^{13}\text{C}$  NMR (126 MHz,  $\text{CDCl}_3$ )  $\delta$  158.38, 134.25, 131.87, 131.00, 121.91, 116.16, 115.05, 114.50, 103.01, 94.84, 56.53.

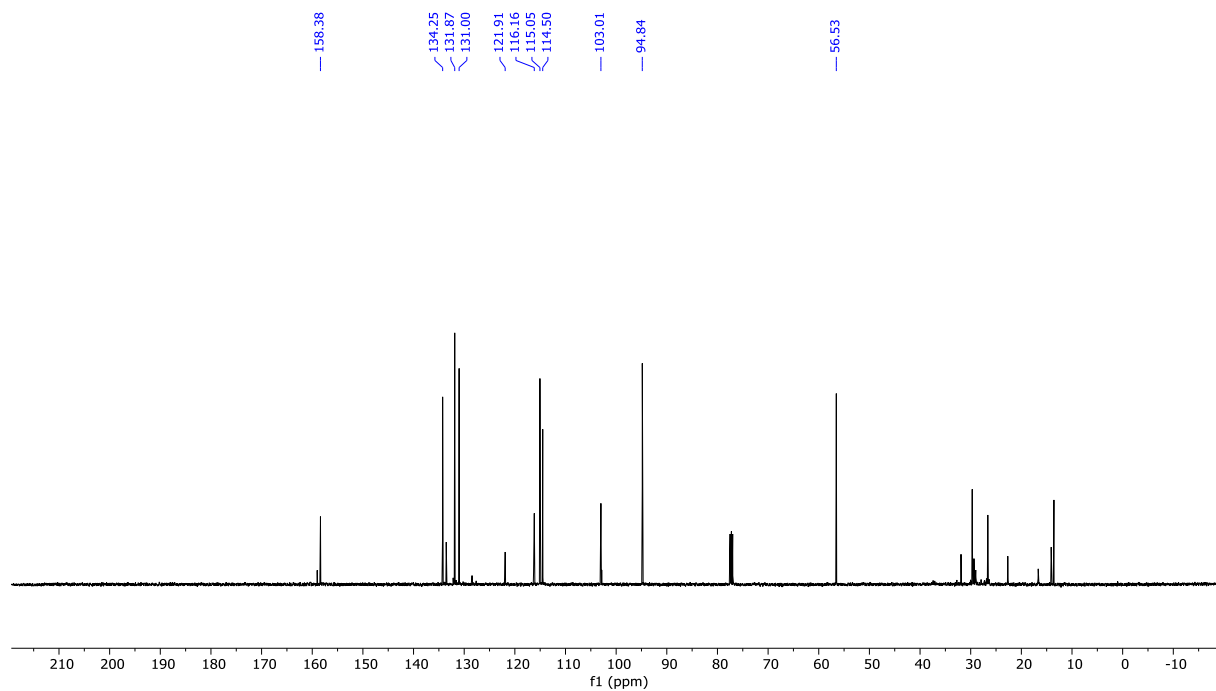

## Compound 22

$^1\text{H}$  NMR (500 MHz,  $\text{CDCl}_3$ )  $\delta$  7.71 (d,  $J = 2.2$  Hz, 1H), 7.64 (dd,  $J = 2.3, 8.8$  Hz, 1H), 7.48 – 7.51 (m, 2H), 7.32 – 7.4 (m, 2H), 7.27 – 7.31 (m, 1H), 7.23 (d,  $J = 8.8$  Hz, 1H), 7.01 (d,  $J = 3.5$  Hz, 2H), 5.31 (s, 2H), 3.54 (s, 3H).

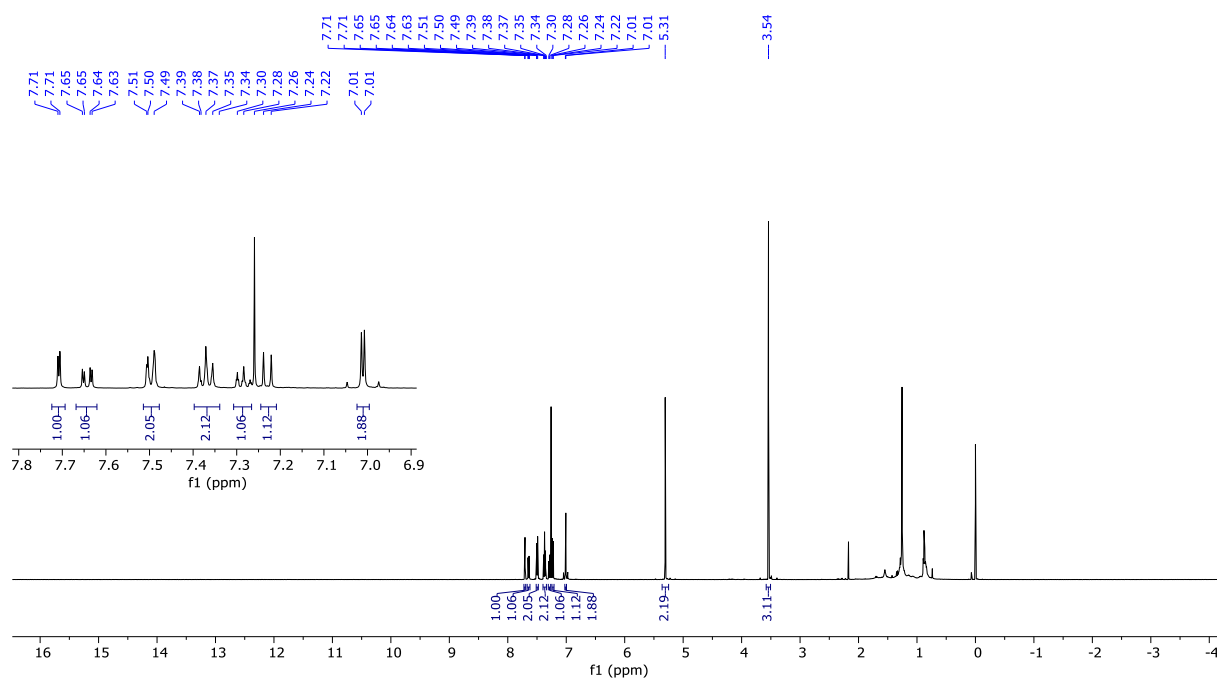

$^{13}\text{C}$  NMR (126 MHz,  $\text{CDCl}_3$ )  $\delta$  158.23, 136.69, 132.10, 131.79, 131.21, 129.45, 128.82, 128.08, 126.57, 125.86, 116.28, 115.24, 103.30, 94.90, 56.67.

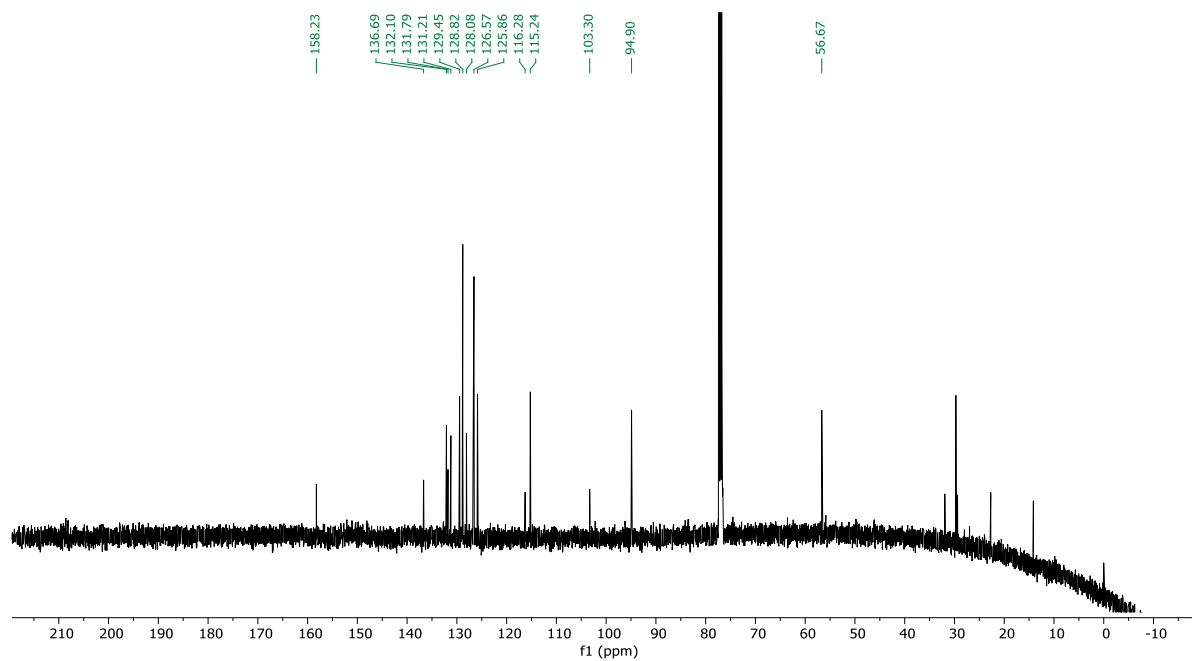

### Compound 23

$^1\text{H}$  NMR (500 MHz,  $\text{CDCl}_3$ )  $\delta$  9.88 (s, 1H), 8.63 (d,  $J = 8.5$  Hz, 1H), 8.09 (d,  $J = 1.9$  Hz, 1H), 7.82 (dd,  $J = 1.8, 8.5$  Hz, 1H), 2.77 (s, 1H), 2.30 (s, 3H).

### *Synthesis of Violaceic Acid and Related Compounds through Aryl Triazene*

S. Ando, J. Burrows, K. Koide. *Organic Letters* **2017**, *19*(5), 1116-1119

## Compound 24

$^1\text{H}$  NMR (500 MHz,  $\text{CDCl}_3$ )  $\delta$  8.31 (d,  $J = 8.4$  Hz, 1H), 7.58 (d,  $J = 1.8$  Hz, 1H), 7.35 (dd,  $J = 1.9, 8.5$  Hz, 1H), 6.60 (dd,  $J = 10.9, 17.6$  Hz, 1H), 5.69 (d,  $J = 17.5$  Hz, 1H), 5.25 (d,  $J = 10.9$  Hz, 1H), 2.24 (s, 3H).

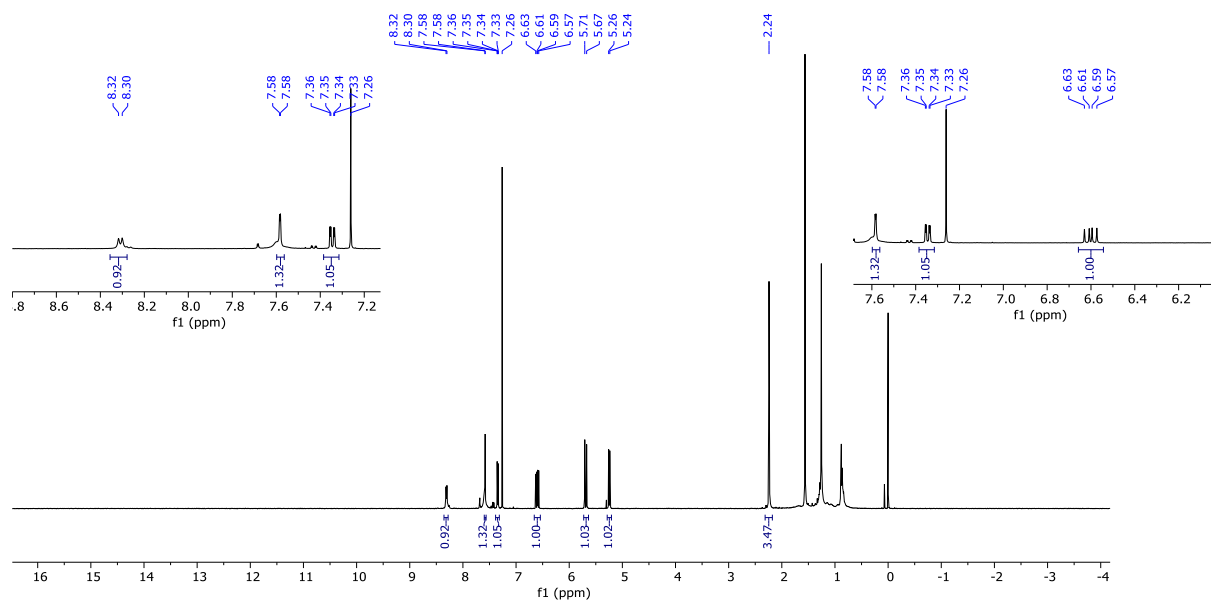

## Compound 25

$^1\text{H}$  NMR (500 MHz,  $\text{CDCl}_3$ )  $\delta$  8.27 (d,  $J = 8.5$  Hz, 1H), 7.59 – 7.63 (m, 1H), 7.55 (s, 1H), 7.41 (d,  $J = 7.4$  Hz, 2H), 7.36 (dd,  $J = 1.8, 8.6$  Hz, 1H), 7.28 (t,  $J = 7.6$  Hz, 2H), 7.15 – 7.23 (m, 1H), 6.86 – 6.99 (m, 2H), 2.16 (s, 3H).

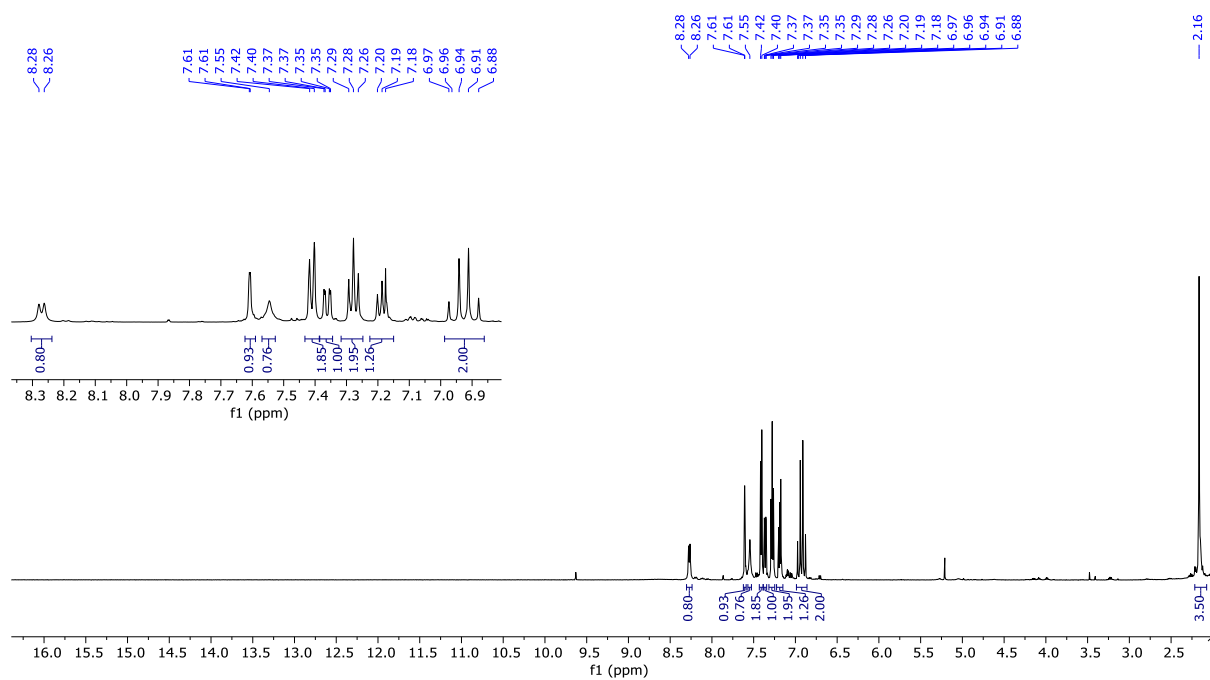

$^{13}\text{C}$  NMR (126 MHz,  $\text{CDCl}_3$ , 27°C)  $\delta$  168.10, 136.91, 134.83, 134.71, 131.45, 129.81, 129.26, 128.75, 127.91, 126.56, 126.52, 121.68, 113.42, 22.72

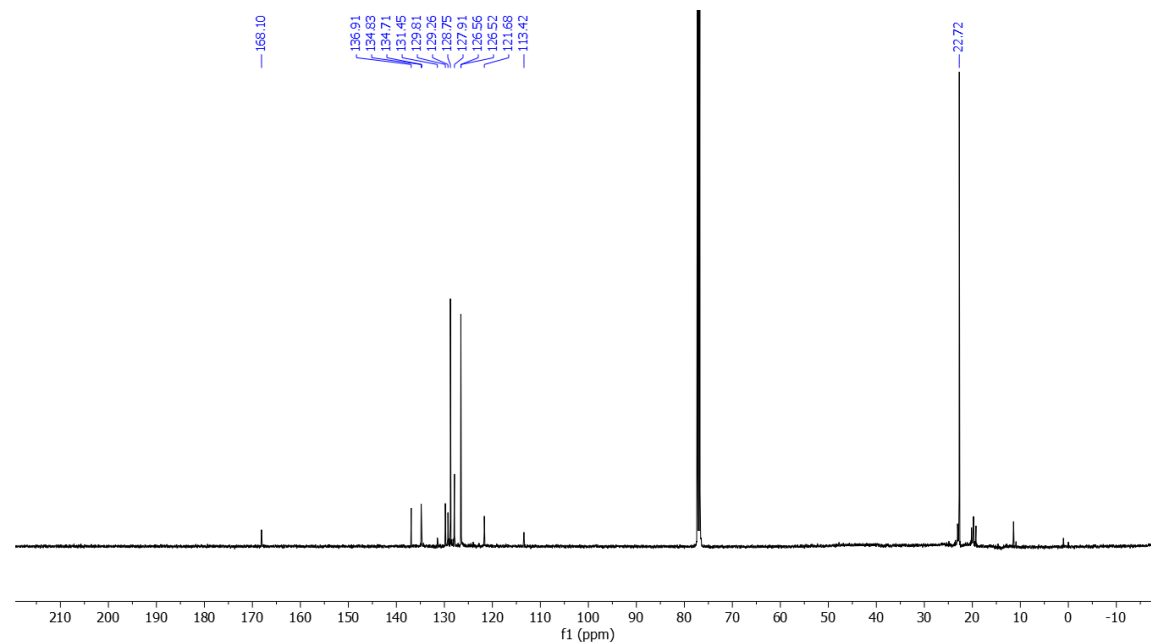

## Compound 26

$^1\text{H}$  NMR (500 MHz,  $\text{CDCl}_3$ )  $\delta$  7.83 (d,  $J = 2.2$  Hz, 1H), 7.55 – 7.67 (m, 6H), 7.49 (dd,  $J = 2.3, 8.5$  Hz, 1H), 7.44 (t,  $J = 7.6$  Hz, 2H), 7.31 – 7.38 (m, 1H), 7.21 (d,  $J = 8.6$  Hz, 1H), 5.27 (s, 2H), 3.54 (s, 3H).

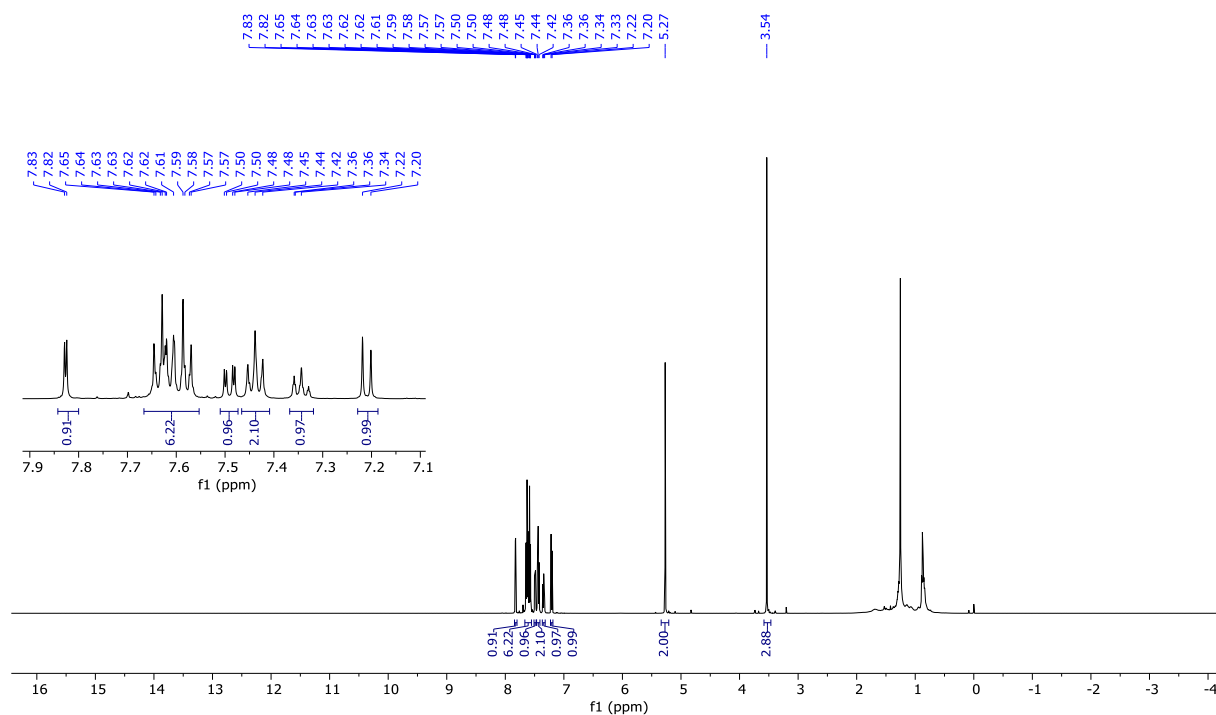

$^{13}\text{C}$  NMR (126 MHz,  $\text{CDCl}_3$ , 27°C)  $\delta$  153.25, 140.59, 140.24, 138.29, 135.99, 131.82, 128.88, 127.61, 127.46, 127.18, 127.07, 126.98, 116.35, 113.36, 95.19, 56.47.

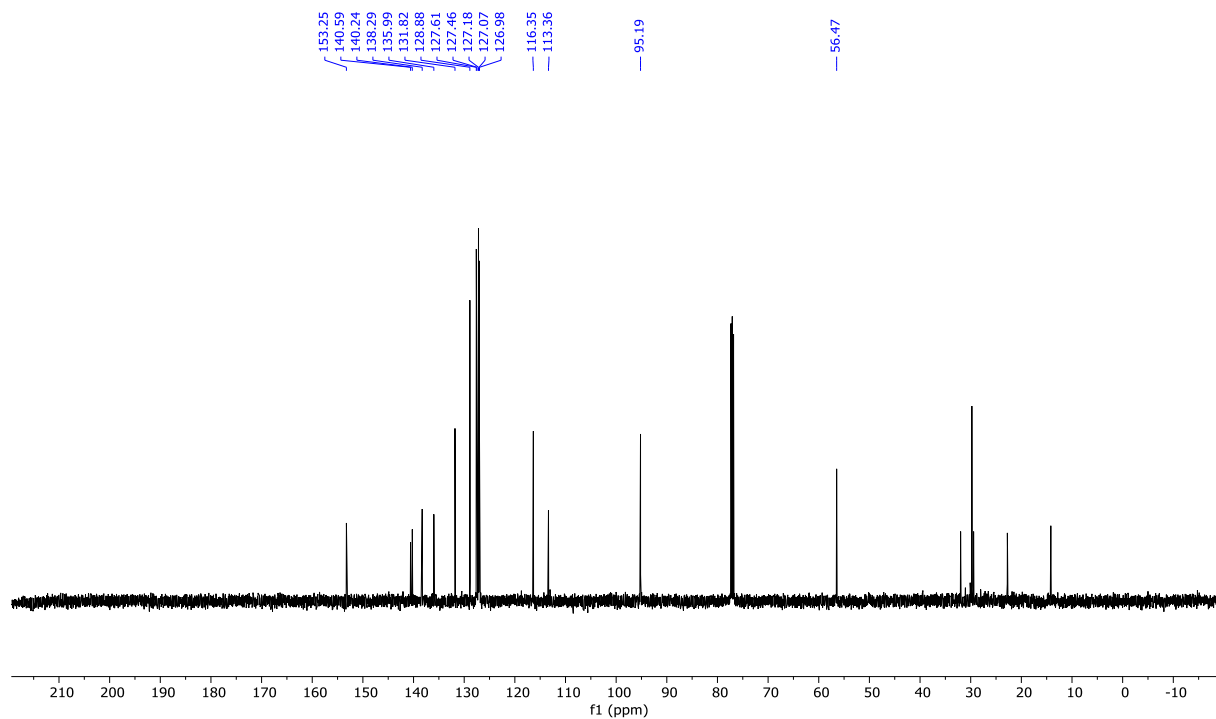

## Compound 27

$^1\text{H}$  NMR (500 MHz,  $\text{CDCl}_3$ )  $\delta$  7.77 (d,  $J = 2.2$  Hz, 1H), 7.71 (t,  $J = 1.6$  Hz, 1H), 7.61 – 7.67 (m, 2H), 7.37 – 7.51 (m, 7H), 7.16 (d,  $J = 8.5$  Hz, 1H), 7.07 (s, 2H), 5.28 (s, 2H), 3.55 (s, 3H).

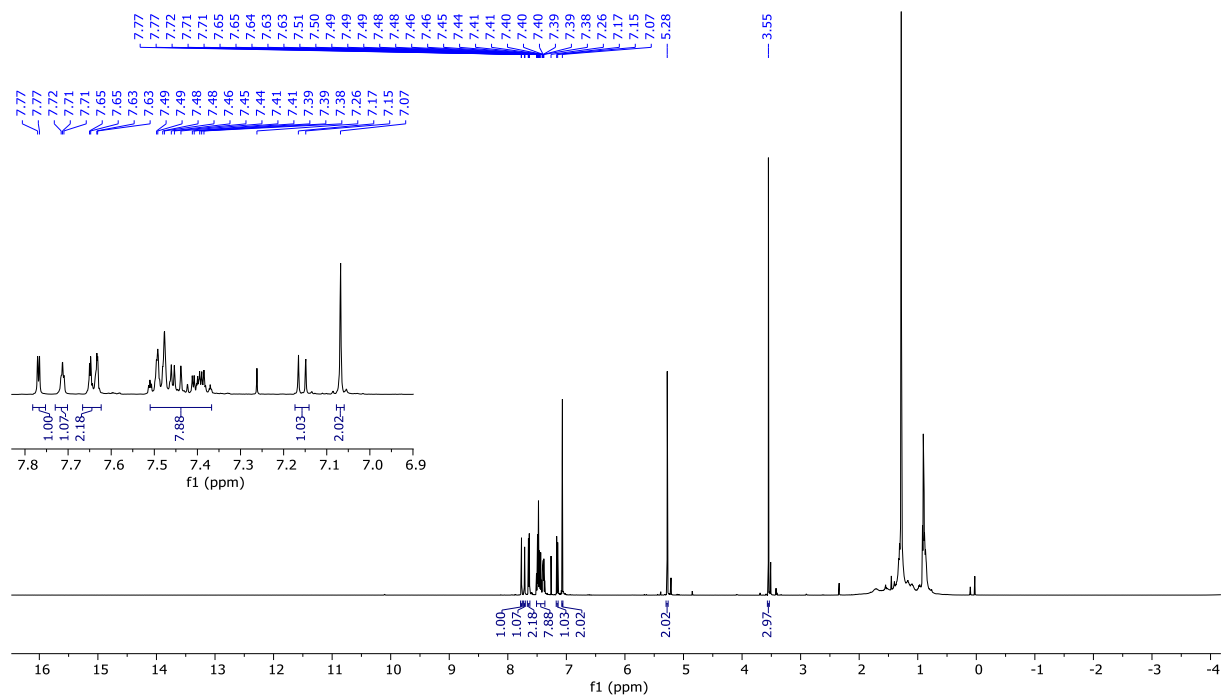

$^{13}\text{C}$  NMR (126 MHz,  $\text{CDCl}_3$ , 27°C)  $\delta$  153.27, 141.79, 141.09, 137.59, 132.83, 131.11, 129.16, 128.82, 128.38, 127.46, 127.22, 127.07, 126.79, 126.61, 125.39, 125.34, 116.14, 113.29, 95.15, 56.44.

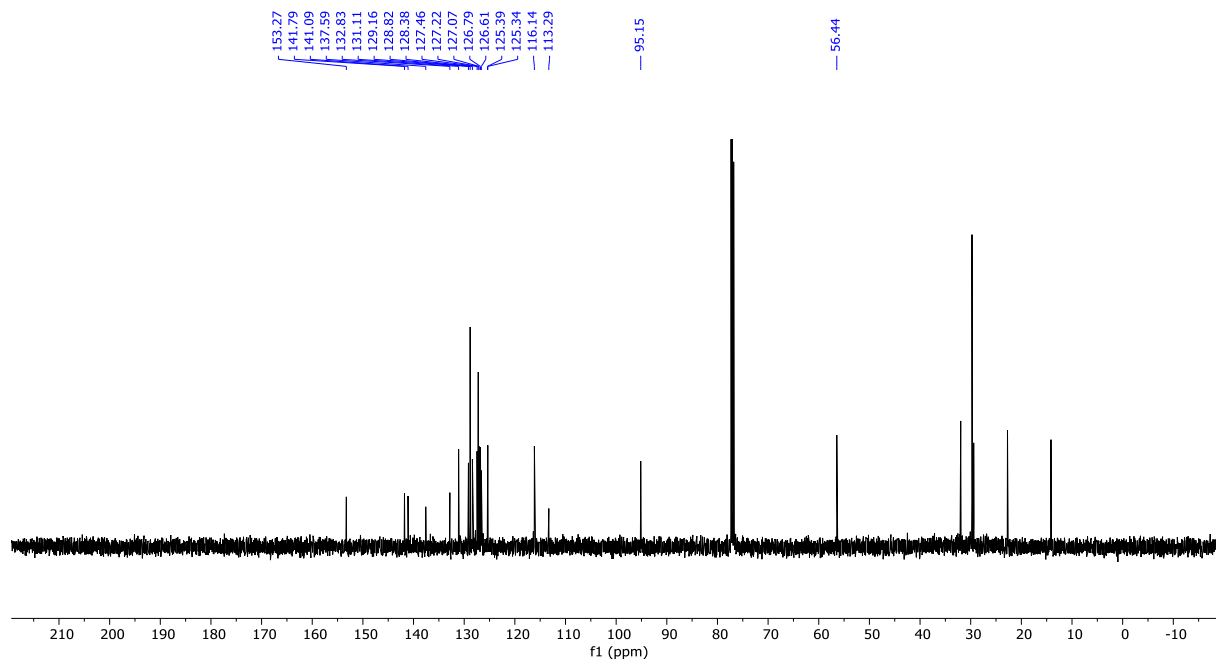

## Compound 28

$^1\text{H}$  NMR (500 MHz,  $\text{CDCl}_3$ )  $\delta$  7.62 (d,  $J = 7.4$  Hz, 1H), 7.46 (d,  $J = 2.1$  Hz, 1H), 7.23 – 7.39 (m, 9H), 7.13 – 7.17 (m, 1H), 6.99 (d,  $J = 8.5$  Hz, 1H), 6.79 – 6.94 (m, 2H), 5.14 (s, 2H), 3.42 (s, 3H).

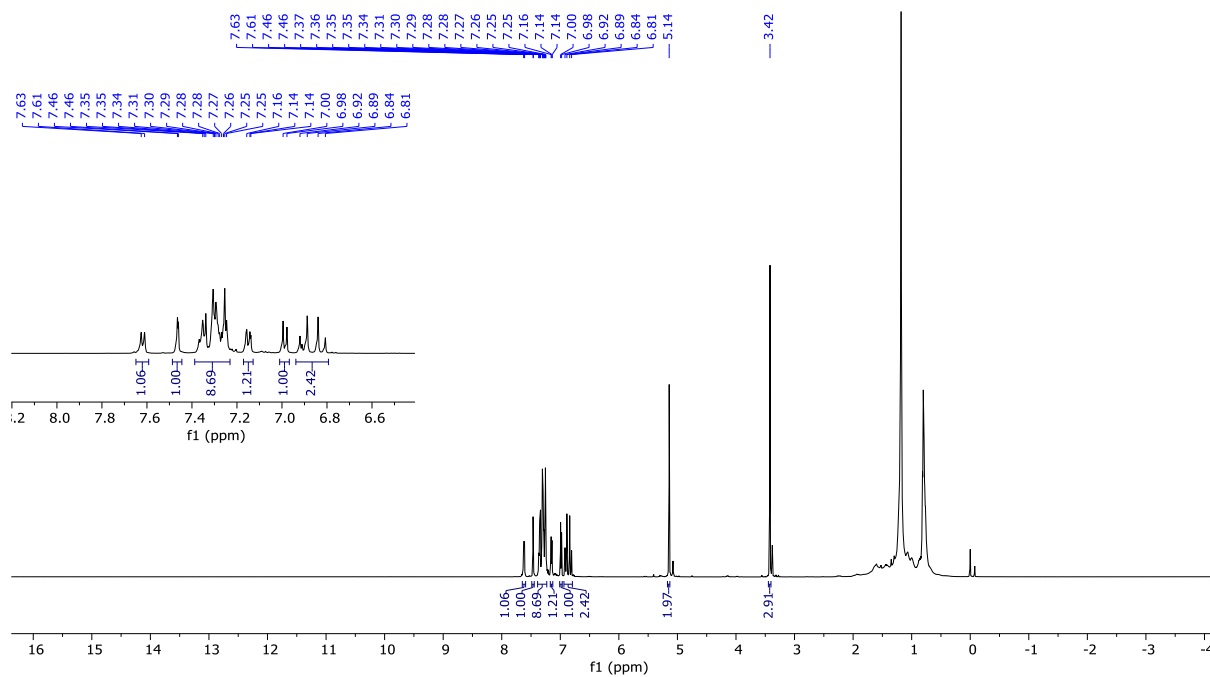

$^{13}\text{C}$  NMR (126 MHz,  $\text{CDCl}_3$ )  $\delta$  153.04, 141.15, 140.82, 135.22, 133.22, 131.32, 130.37, 129.89, 128.20, 127.69, 127.64, 127.61, 127.58, 127.22, 126.49, 125.84, 116.15, 113.16, 95.11, 56.41.

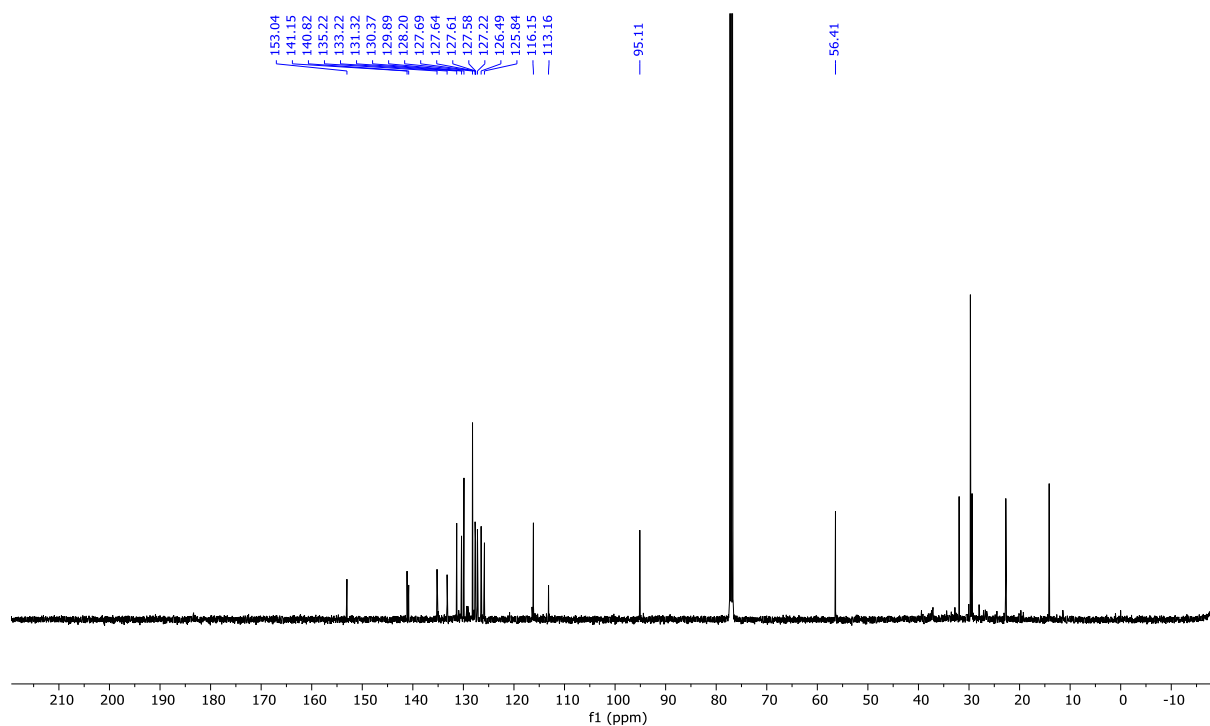



## Compound 29

$^1\text{H}$  NMR (500 MHz,  $\text{CDCl}_3$ )  $\delta$  7.64 (d,  $J = 2.1$  Hz, 1H), 7.55 – 7.6 (m, 1H), 7.54 (d,  $J = 7.8$  Hz, 1H), 7.43 – 7.46 (m, 1H), 7.31 (s, 2H), 7.24 (dd,  $J = 2.1, 8.5$  Hz, 1H), 7.17 – 7.21 (m, 2H), 7.00 (d,  $J = 8.5$  Hz, 1H), 6.93 (d,  $J = 7.7$  Hz, 2H), 5.11 (s, 2H), 3.39 (s, 3H), 1.39 (s, 6H).

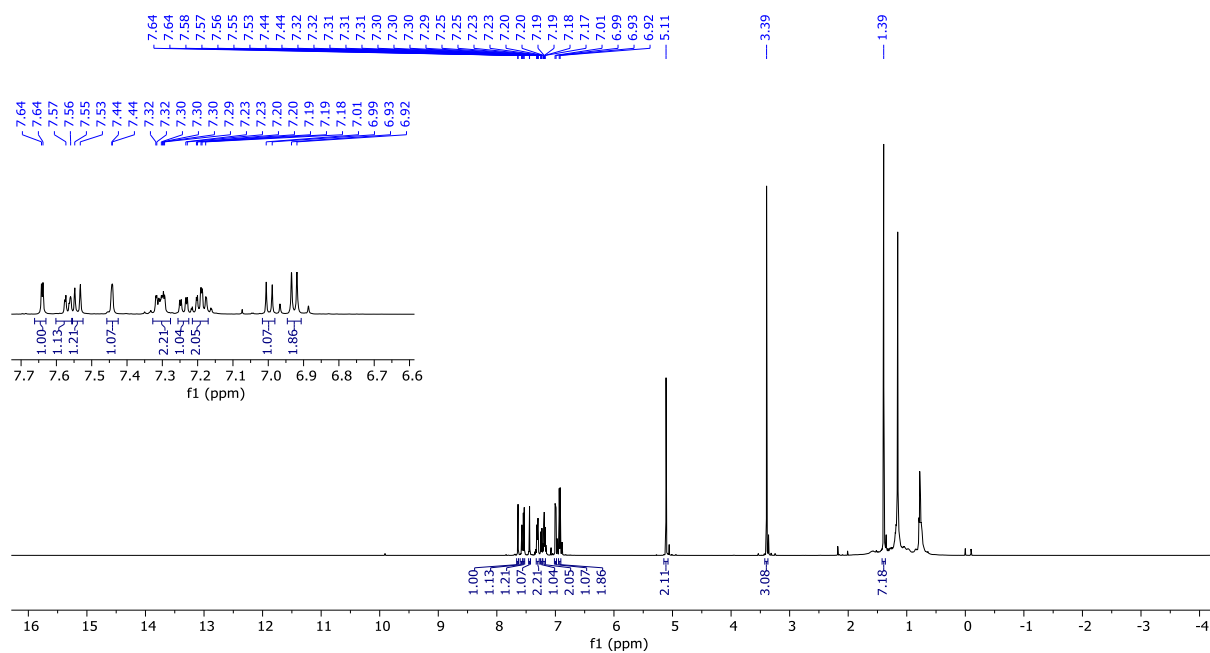

$^{13}\text{C}$  NMR (126 MHz,  $\text{CDCl}_3$ , 27°C)  $\delta$  154.22, 153.97, 153.18, 139.14, 138.95, 136.37, 133.15, 131.07, 128.96, 127.39, 127.15, 126.71, 126.14, 125.97, 122.68, 120.47, 120.35, 120.12, 116.20, 113.36, 95.18, 56.45, 46.85, 27.29.

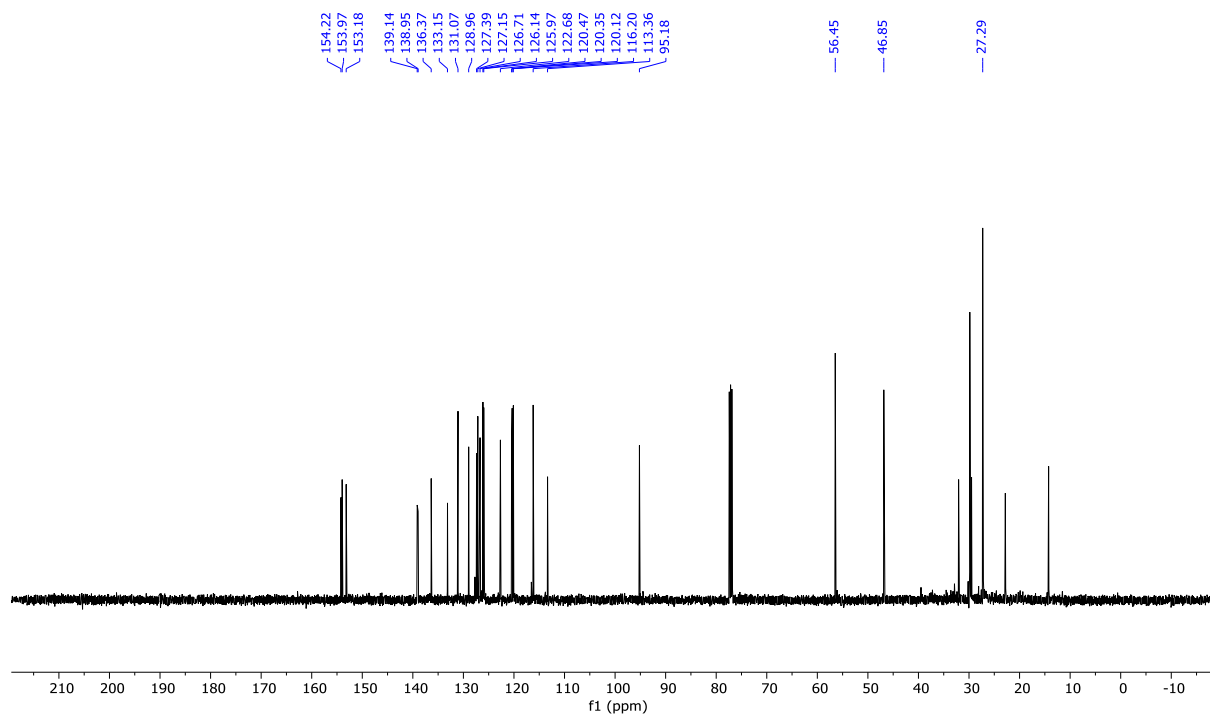

## DC01

$^1\text{H}$  NMR (500 MHz,  $\text{CDCl}_3$ )  $\delta$  8.37 (d,  $J = 2.4$  Hz, 1H), 7.69 (dd,  $J = 8.6, 2.4$  Hz, 1H), 7.51 (dd,  $J = 7.3, 1.2$  Hz, 2H), 7.39 – 7.34 (m, 2H), 7.30 – 7.27 (m, 1H), 7.15 – 7.04 (m, 3H), 4.11 (s, 3H).

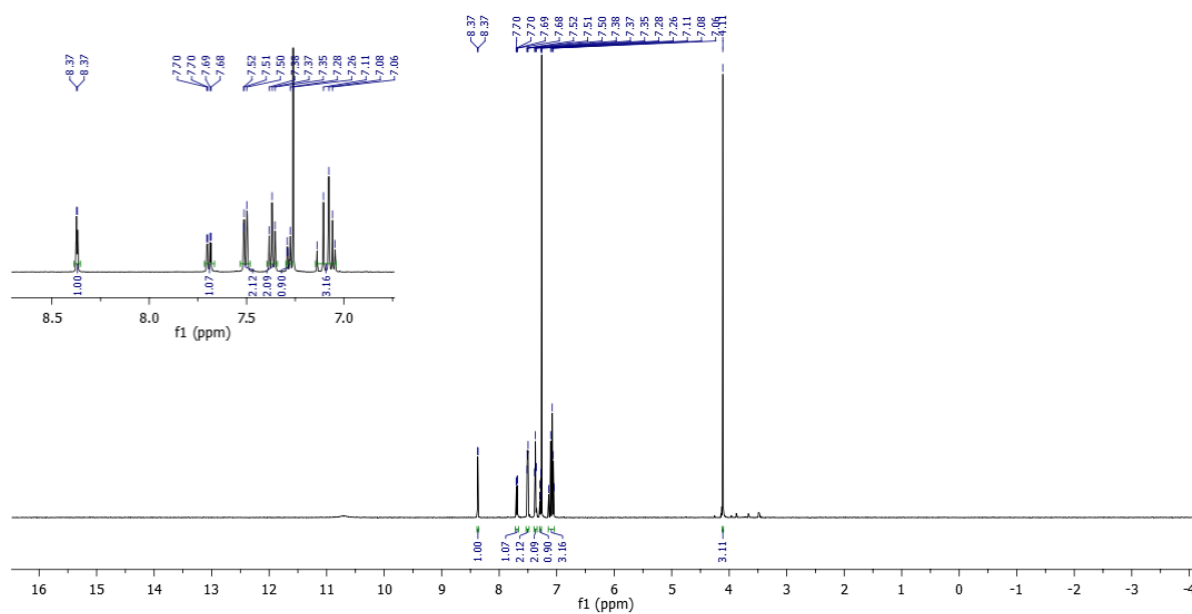

$^{13}\text{C}$  NMR (126 MHz,  $\text{CDCl}_3$ )  $\delta$  165.14, 157.18, 136.89, 132.82, 132.02, 131.50, 129.32, 128.77, 127.90, 126.53, 126.30, 117.80, 112.03, 56.92.

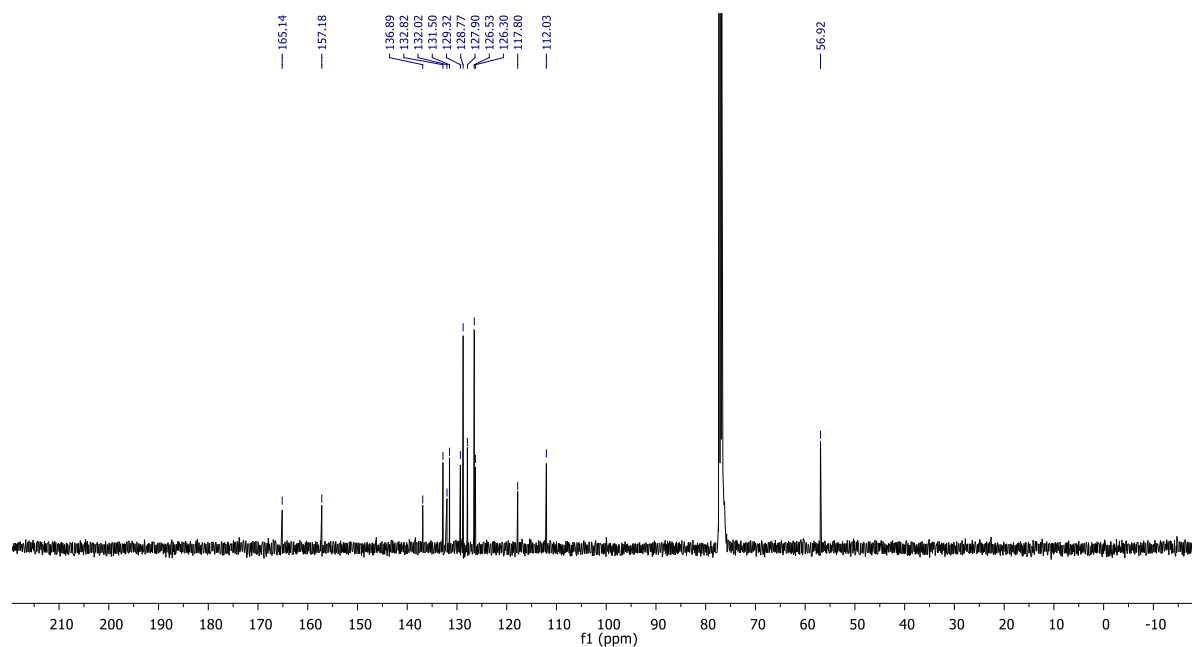

## DC02

$^1\text{H}$  NMR (500 MHz,  $\text{CD}_3\text{CN}$ )  $\delta$  8.05 (d,  $J = 1.7$  Hz, 1H), 7.79 (dd,  $J = 8.6, 2.0$  Hz, 1H), 7.58 (d,  $J = 7.6$  Hz, 2H), 7.40 (t,  $J = 7.6$  Hz, 2H), 7.29 (t,  $J = 7.3$  Hz, 1H), 7.16 (dd,  $J = 37.0, 16.5$  Hz, 2H), 7.01 (d,  $J = 8.7$  Hz, 1H).

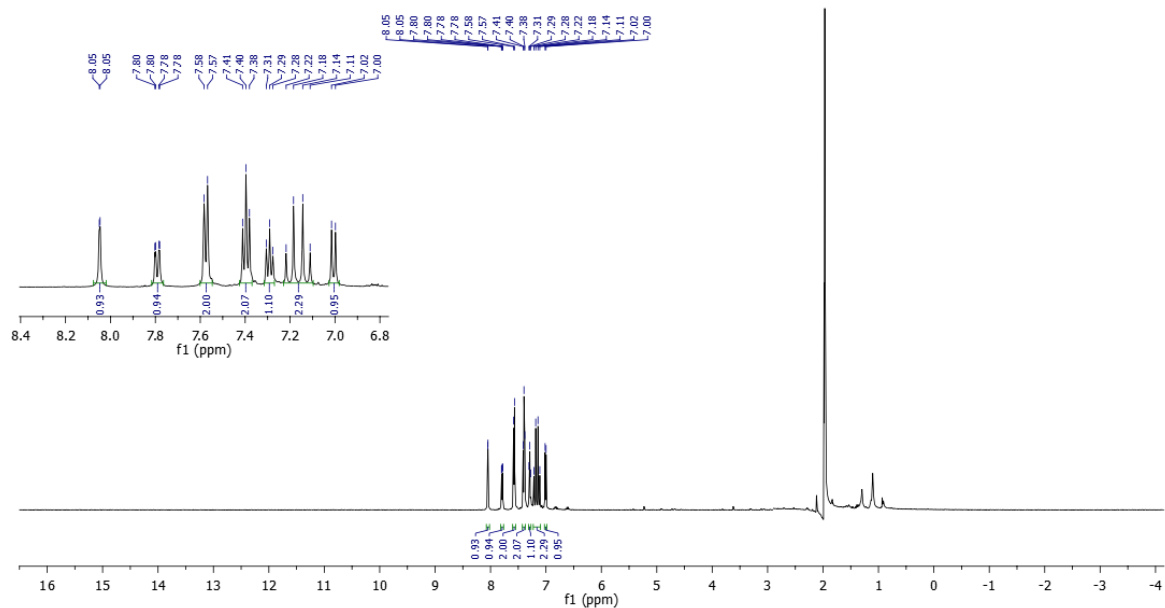

$^{13}\text{C}$  NMR (126 MHz,  $\text{CD}_3\text{CN}$ )  $\delta$  171.30, 161.22, 137.19, 132.96, 128.61, 128.39, 128.32, 127.14, 126.92, 126.84, 125.96, 117.39 (probably last peak under solvent peak).

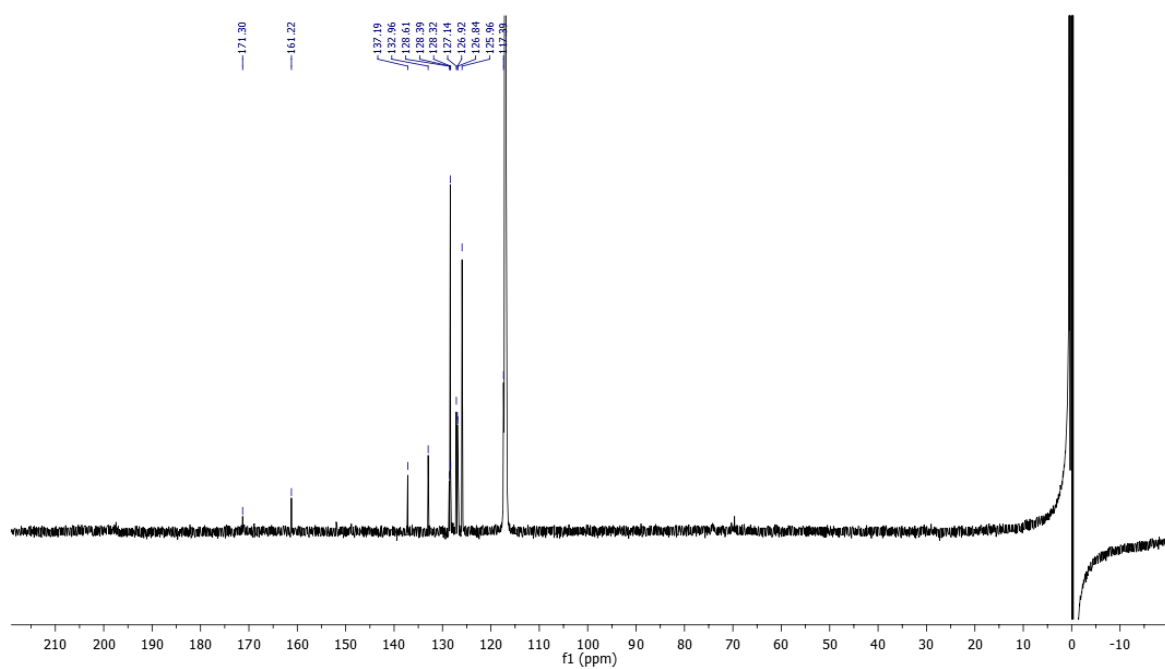

### DC03

$^1\text{H}$  NMR (500 MHz,  $\text{CDCl}_3$ )  $\delta$  8.05 (d,  $J = 2.3$  Hz, 1H), 7.39 (dd,  $J = 8.7, 2.3$  Hz, 1H), 7.26 – 7.16 (m, 5H), 6.84 (d,  $J = 8.7$  Hz, 1H), 6.63 (d,  $J = 12.1$  Hz, 1H), 6.53 (d,  $J = 12.2$  Hz, 1H), 4.01 (s, 3H).

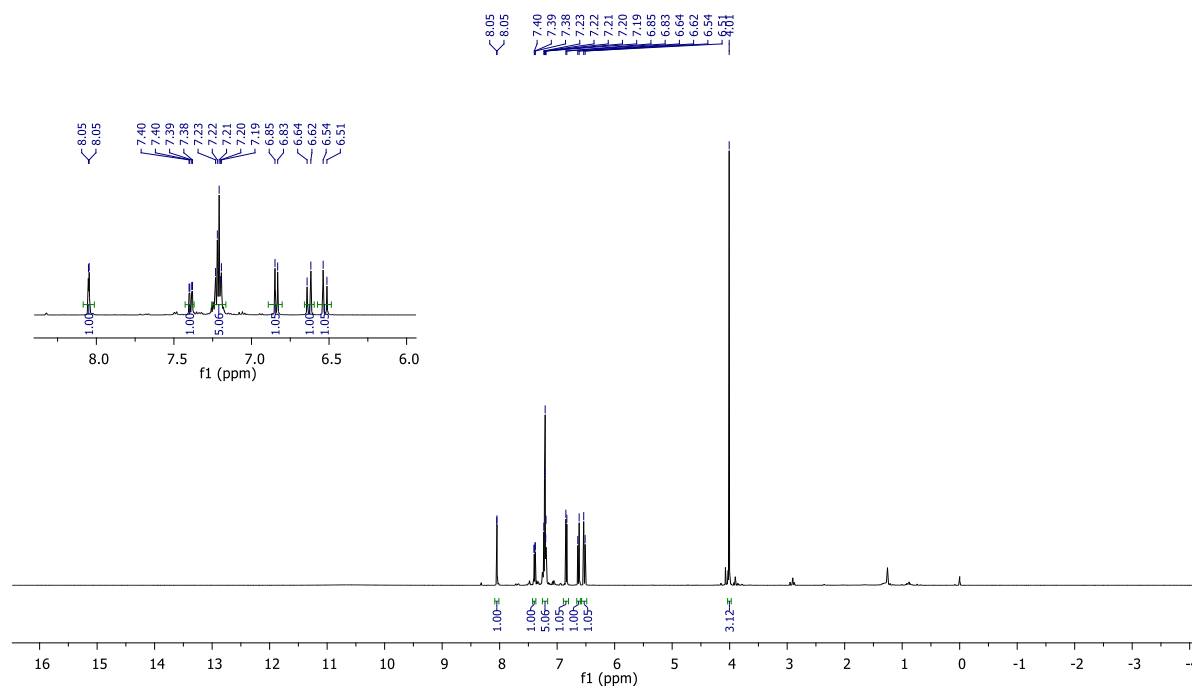

$^{13}\text{C}$  NMR (126 MHz,  $\text{CDCl}_3$ )  $\delta$  165.54, 156.98, 136.72, 135.05, 134.29, 131.23, 130.81, 128.63, 128.33, 128.02, 127.28, 117.40, 111.42, 56.62.

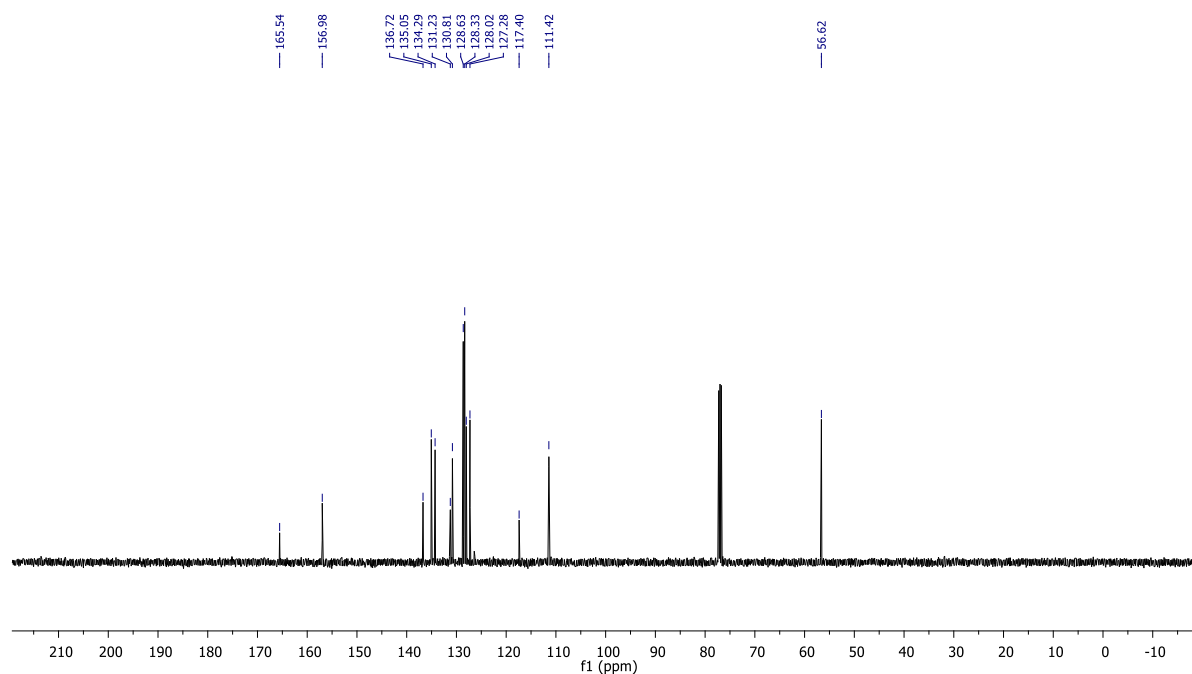

### DC04

$^1\text{H}$  NMR (500 MHz,  $\text{CDCl}_3$ )  $\delta$  8.36 (d,  $J = 2.1$  Hz, 1H), 7.71 (dd,  $J = 8.6, 2.2$  Hz, 1H), 7.57 – 7.48 (m, 2H), 7.39 – 7.32 (m, 3H), 7.05 (d,  $J = 8.6$  Hz, 1H), 4.10 (s, 3H).

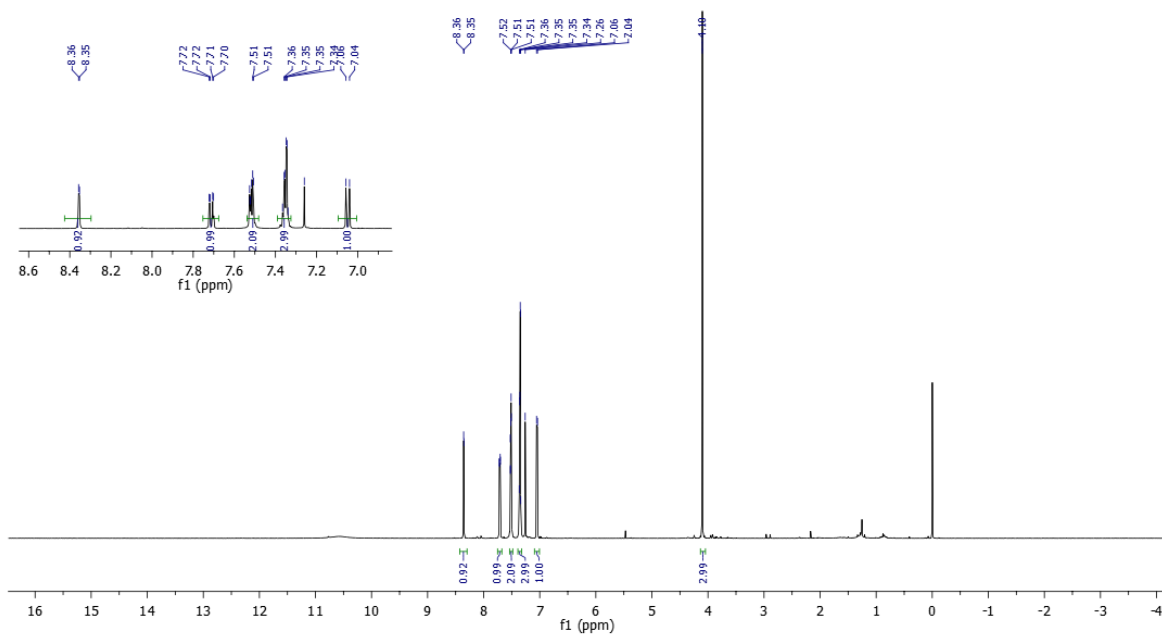

$^{13}\text{C}$  NMR (126 MHz,  $\text{CDCl}_3$ )  $\delta$  164.68, 157.62, 137.74, 137.09, 131.57, 128.47, 128.39, 122.84, 117.89, 117.72, 111.91, 89.76, 87.36, 56.90.

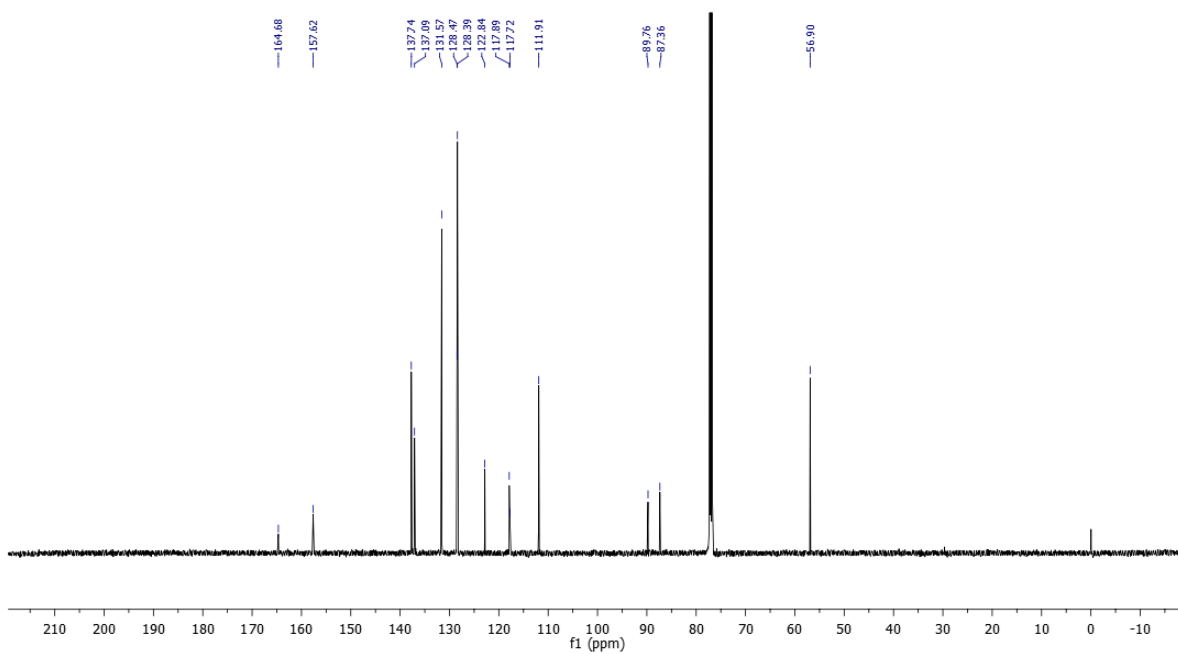

## DC05

$^1\text{H}$  NMR (500 MHz,  $\text{CDCl}_3$ )  $\delta$  10.70 (s, 1H), 8.57 (s, 1H), 8.04 (s, 1H), 7.96 – 7.82 (m, 4H), 7.73 (d,  $J = 8.5$  Hz, 1H), 7.50 (t,  $J = 6.8$  Hz, 2H), 7.17 (d,  $J = 8.6$  Hz, 1H), 4.13 (s, 3H).

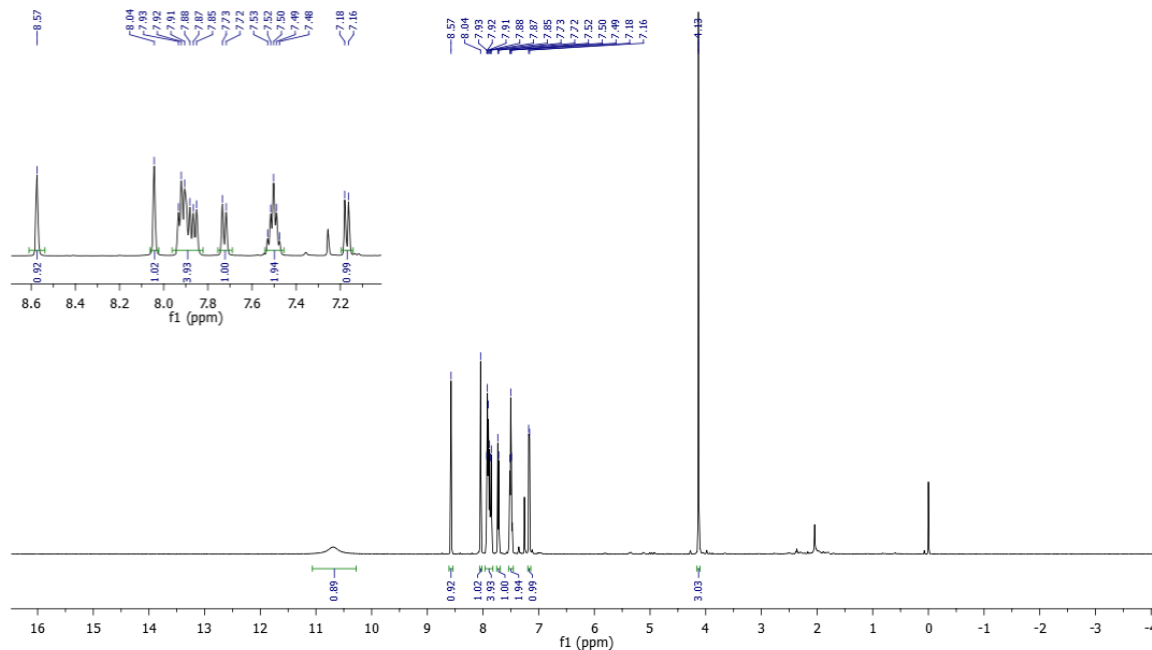

$^{13}\text{C}$  NMR (126 MHz,  $\text{CDCl}_3$ )  $\delta$  165.42, 157.45, 136.20, 135.32, 133.64, 133.57, 132.69, 132.43, 128.70, 128.20, 127.66, 126.52, 126.20, 125.59, 124.92, 117.95, 112.28, 56.94.

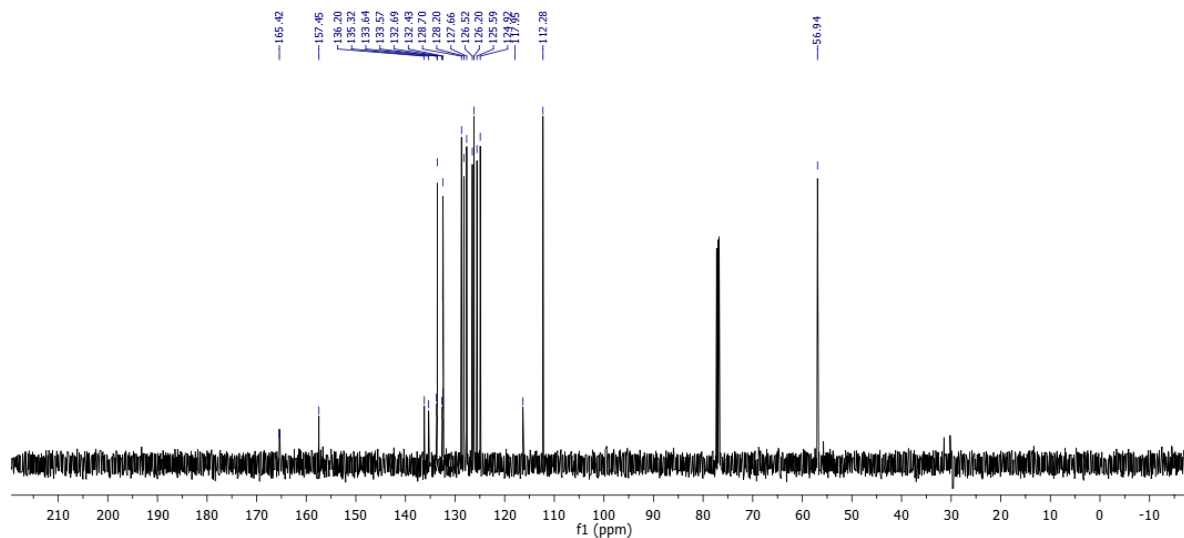

## DC07

$^1\text{H}$  NMR (500 MHz, DMSO)  $\delta$  7.97 (d,  $J = 2.3$  Hz, 1H), 7.80 (dd,  $J = 8.6, 2.2$  Hz, 1H), 7.66 – 7.61 (m, 2H), 7.23 – 7.10 (m, 4H), 6.99 (d,  $J = 8.6$  Hz, 1H).

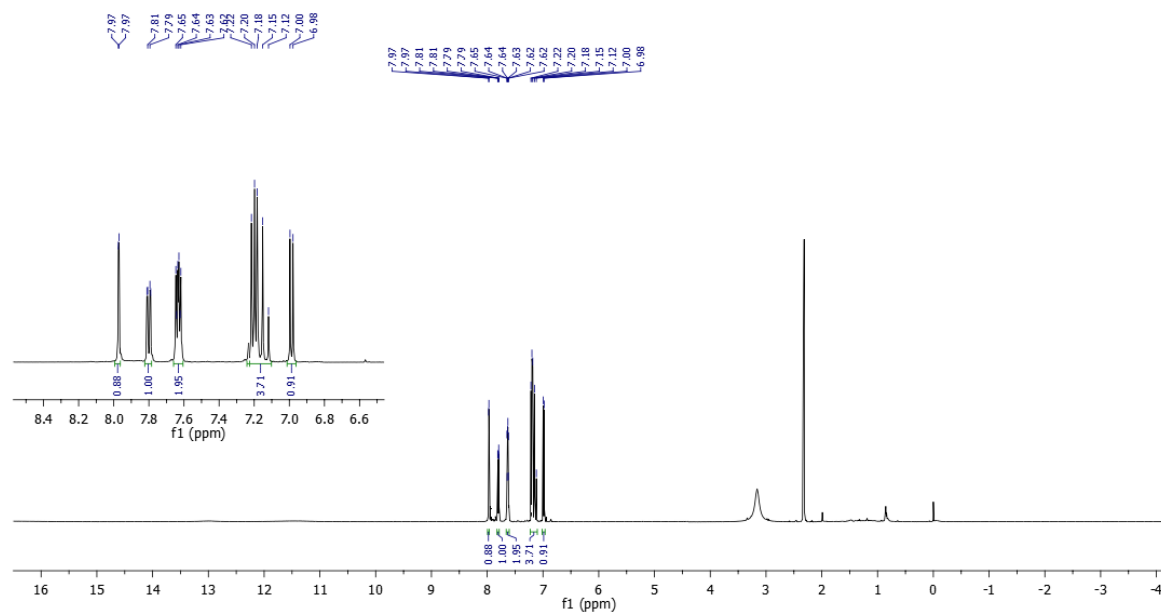

$^{13}\text{C}$  NMR (126 MHz, DMSO)  $\delta$  171.71, 161.45 (d,  $J = 236.6$  Hz), 160.84, 133.83, 132.82, 128.42, 128.20, 128.08 (d,  $J = 7.3$  Hz), 127.32, 125.48, 117.56, 115.51 (d,  $J = 21.0$  Hz), 113.61.

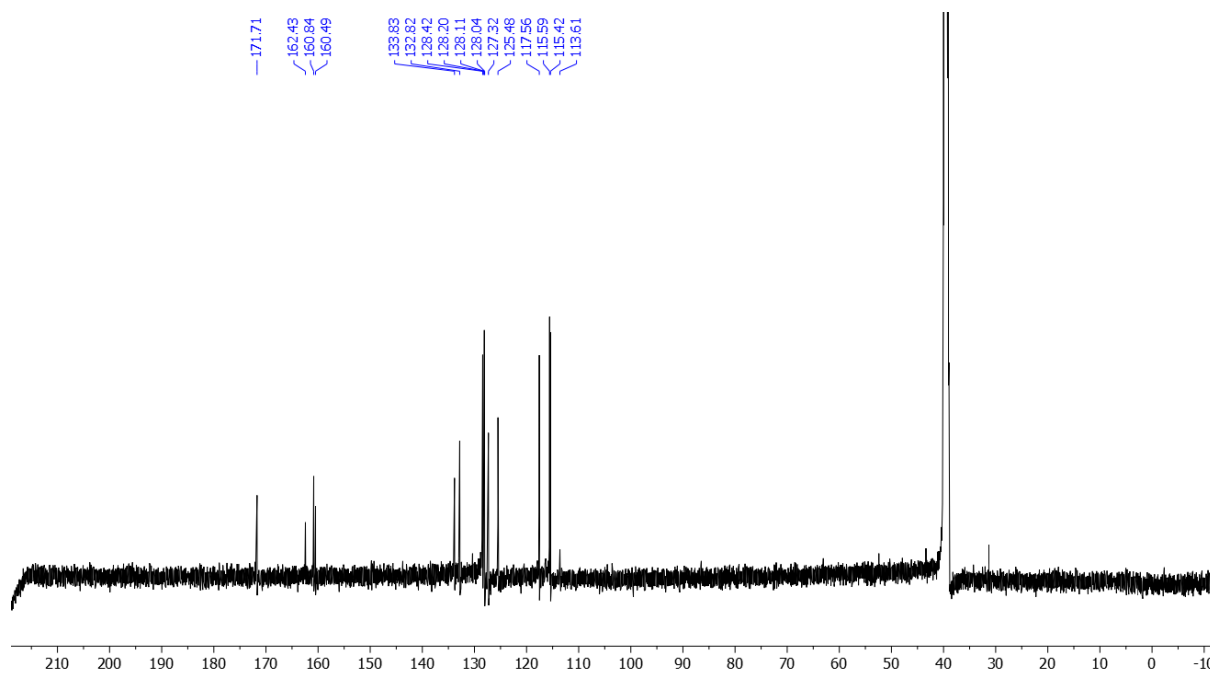

## DC08

$^1\text{H}$  NMR (500 MHz, DMSO)  $\delta$  7.96 (d,  $J = 2.3$  Hz, 1H), 7.80 (dd,  $J = 8.7, 2.3$  Hz, 1H), 7.56 – 7.49 (m, 2H), 7.28 – 7.23 (m, 2H), 7.20 (d,  $J = 16.5$  Hz, 1H), 7.09 (d,  $J = 16.5$  Hz, 1H), 6.98 (d,  $J = 8.6$  Hz, 1H), 2.49 (s, 3H).

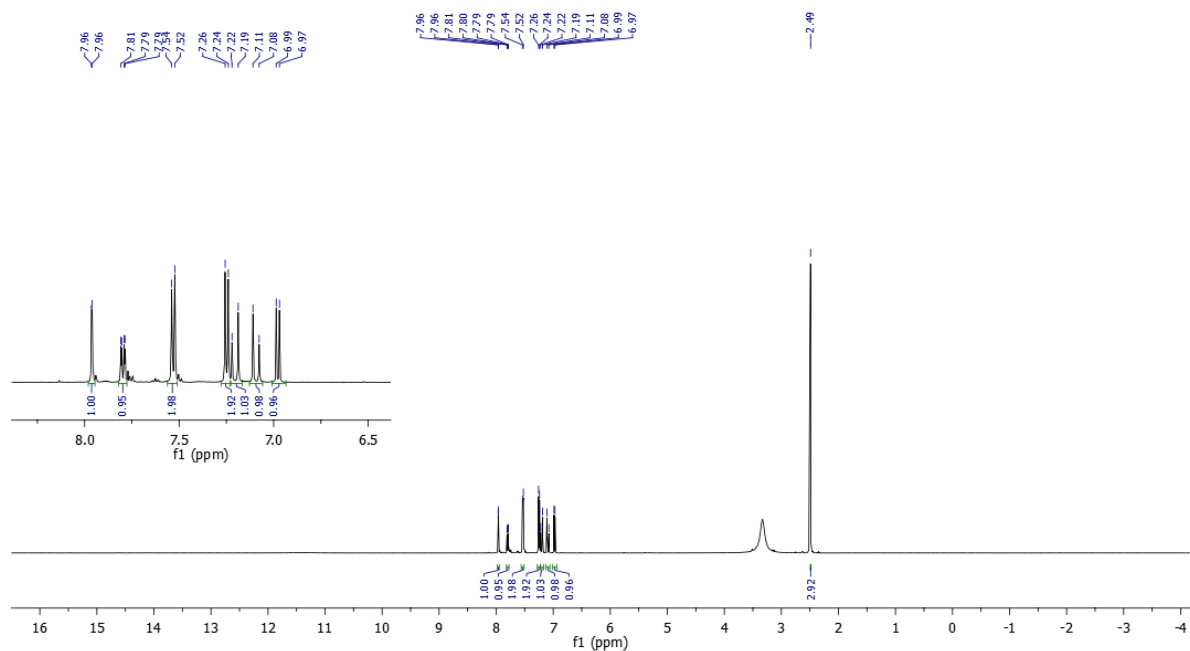

$^{13}\text{C}$  NMR (126 MHz, DMSO)  $\delta$  171.72, 160.56, 137.16, 133.90, 132.96, 128.54, 128.32, 126.76, 126.55, 126.27, 126.08, 117.61, 113.18, 30.65.

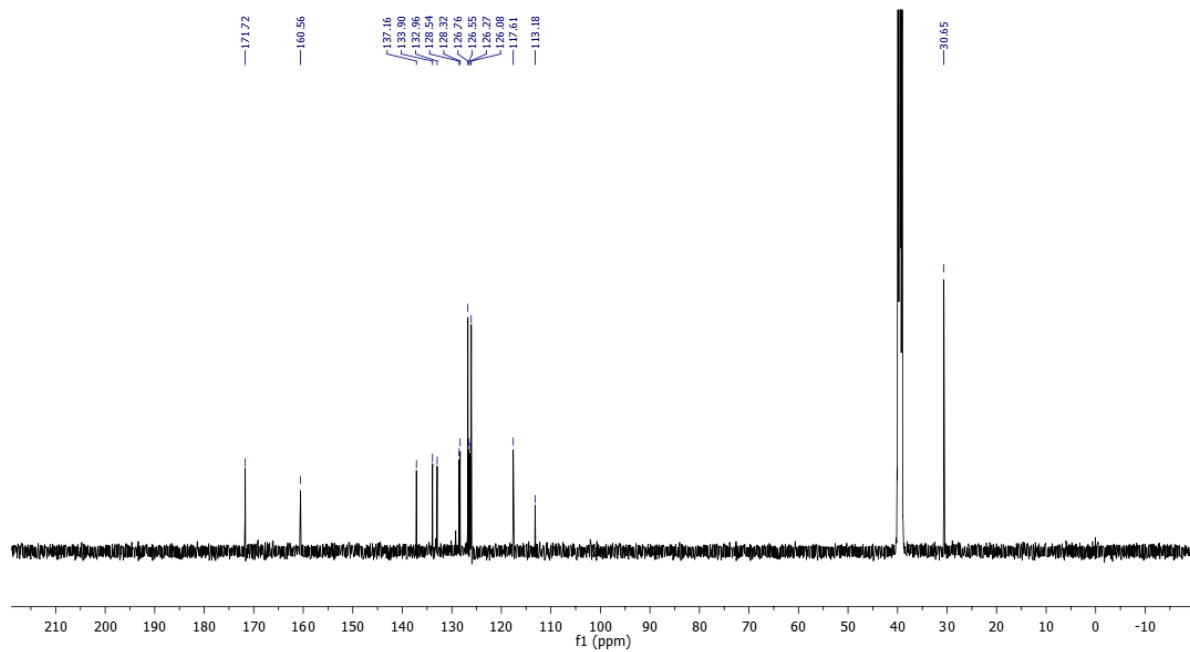



## DC10

$^1\text{H}$  NMR (500 MHz, DMSO)  $\delta$  8.01 (d,  $J = 2.2$  Hz, 1H), 7.84 (dd,  $J = 8.7, 2.3$  Hz, 1H), 7.73 – 7.66 (m, 6H), 7.51 – 7.43 (m, 2H), 7.39 – 7.34 (m, 1H), 7.31 (d,  $J = 16.5$  Hz, 1H), 7.19 (d,  $J = 16.5$  Hz, 1H), 7.00 (d,  $J = 8.6$  Hz, 1H).

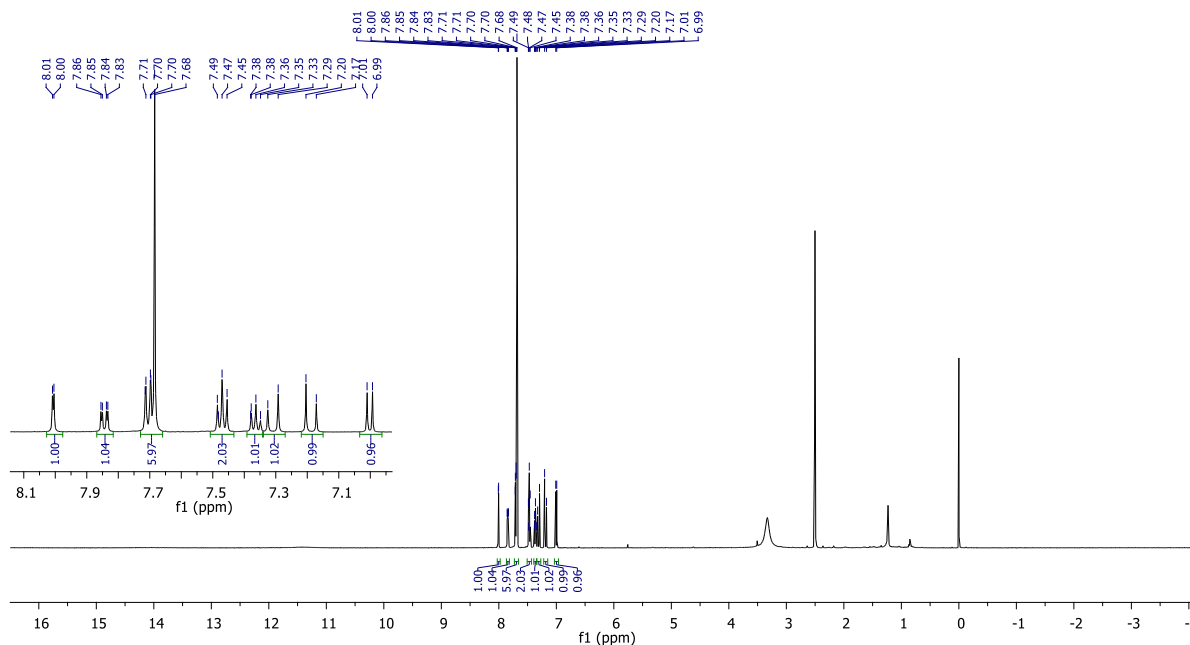

$^{13}\text{C}$  NMR (126 MHz, DMSO)  $\delta$  171.72, 160.69, 139.64, 138.88, 136.38, 133.08, 128.92, 128.51, 128.50, 127.43, 127.40, 126.86, 126.84, 126.40, 126.31, 117.65, 113.20.

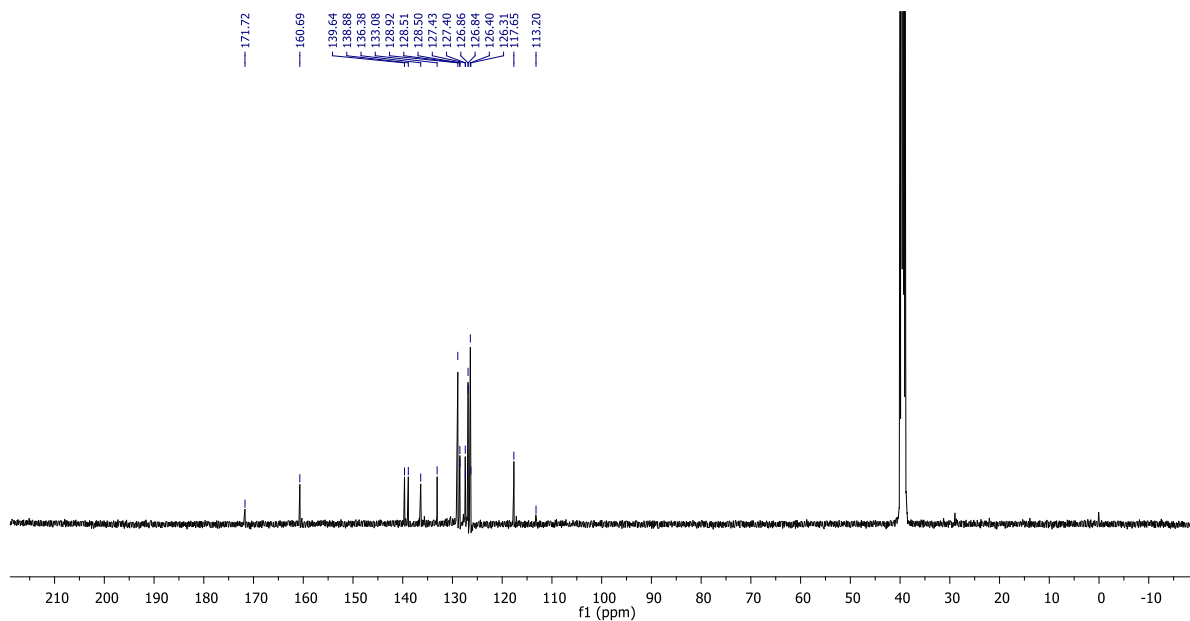

## DC11

$^1\text{H}$  NMR (500 MHz, DMSO)  $\delta$  8.20 (d,  $J = 2.4$  Hz, 1H), 8.18 (d,  $J = 1.4$  Hz, 1H), 8.02 – 7.92 (m, 4H), 7.82 (dd,  $J = 8.6, 1.9$  Hz, 1H), 7.56 – 7.48 (m, 2H), 7.12 (d,  $J = 8.6$  Hz, 1H).

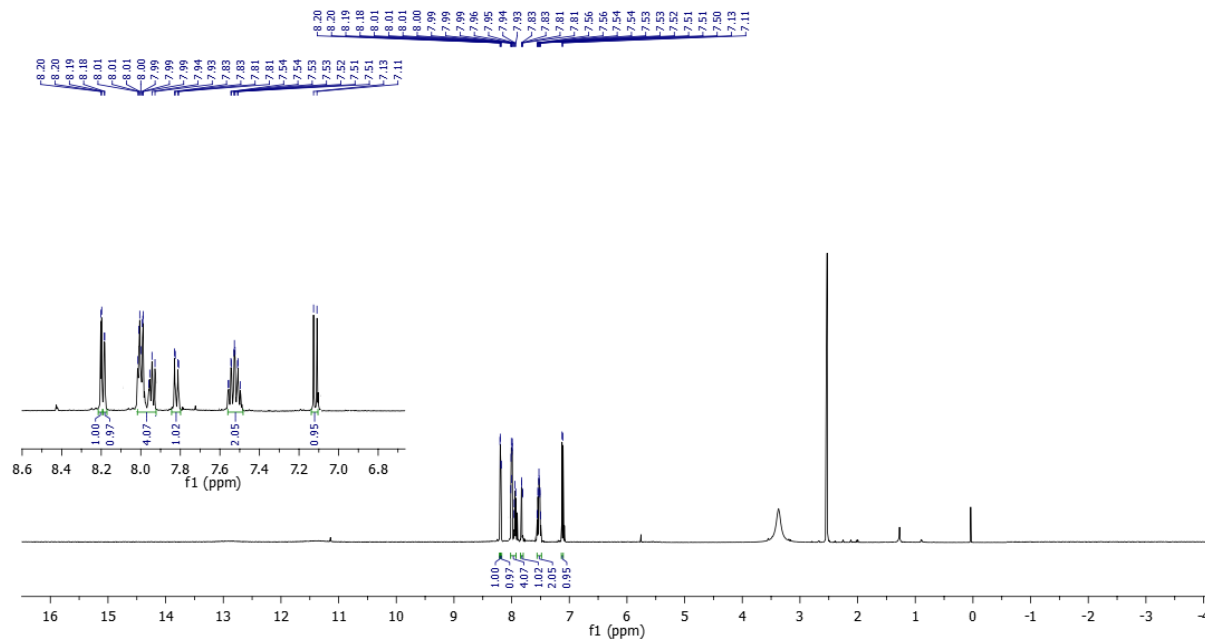

$^{13}\text{C}$  NMR (126 MHz, DMSO)  $\delta$  171.73, 160.66, 136.31, 134.11, 133.36, 131.98, 131.04, 128.53, 128.22, 128.08, 127.44, 126.40, 125.96, 124.67, 124.47, 117.92 (one of the carbon peaks is not visible)

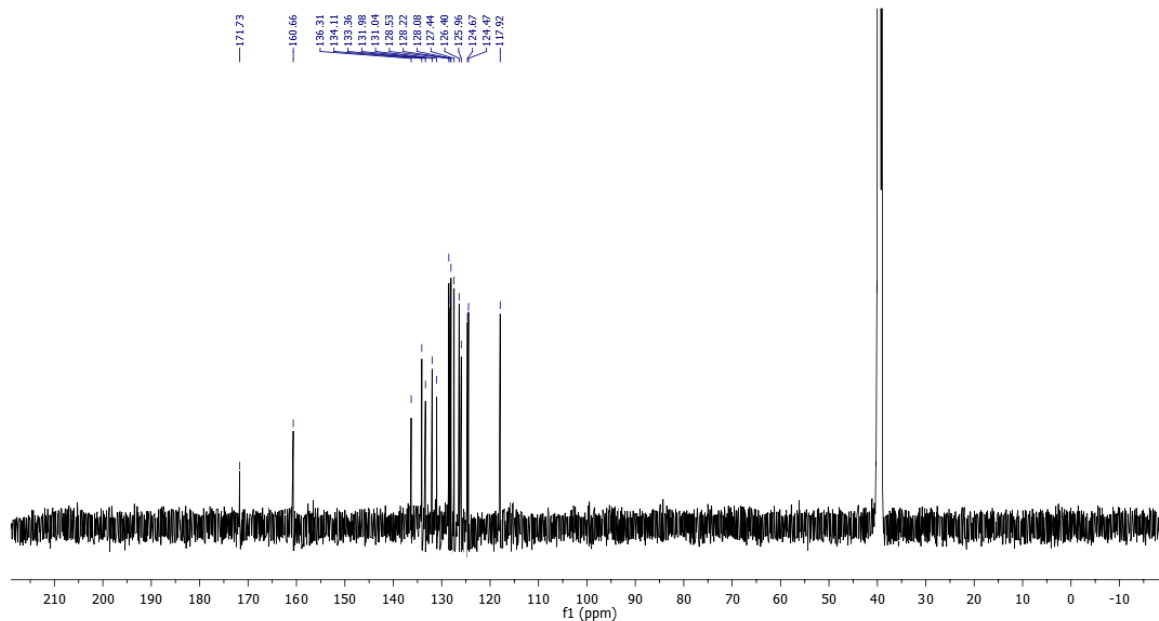

## DC12

$^1\text{H}$  NMR (400 MHz,  $\text{CD}_3\text{CN}$ )  $\delta$  7.93 (d,  $J = 2.1$  Hz, 1H), 7.58 (dd,  $J = 2.1, 8.7$  Hz, 1H), 7.52 (d,  $J = 7.4$  Hz, 2H), 7.34 (t,  $J = 7.6$  Hz, 2H), 7.23 (d,  $J = 7.3$  Hz, 1H), 7.11 (d,  $J = 16.4$  Hz, 1H), 6.98 (d,  $J = 16.5$  Hz, 1H), 6.77 (d,  $J = 8.6$  Hz, 1H).

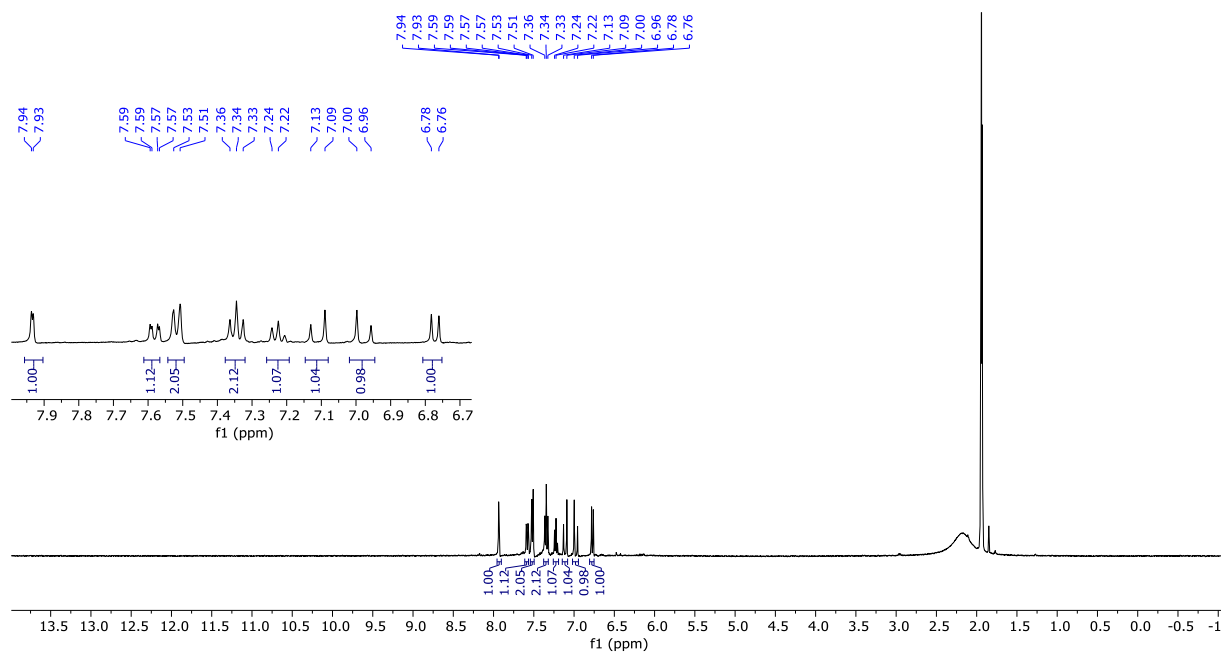

$^{13}\text{C}$  NMR (126 MHz,  $\text{CD}_3\text{CN}$ )  $\delta$  169.35, 151.84, 138.51, 132.20, 130.86, 129.22, 128.61, 127.52, 126.56, 125.65, 125.22, 117.61, 109.78.

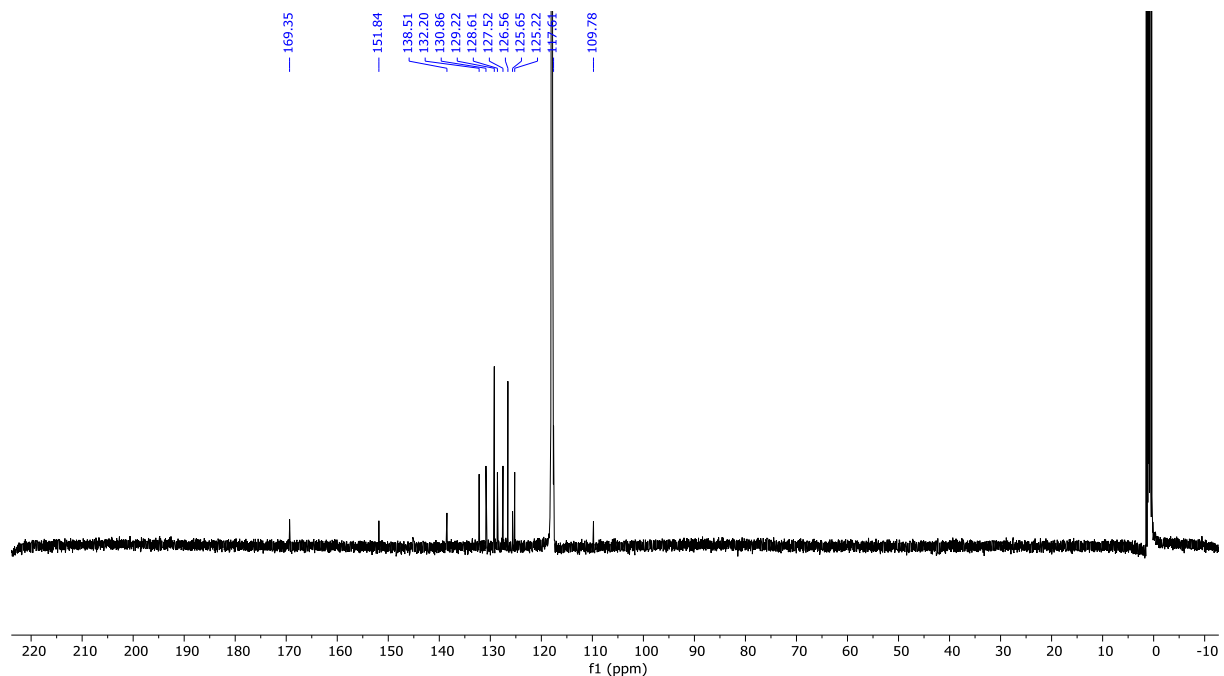

### DC13

$^1\text{H}$  NMR (500 MHz, DMSO)  $\delta$  8.05 (d,  $J = 2.2$  Hz, 1H), 7.91 – 7.80 (m, 5H), 7.48 (d,  $J = 16.5$  Hz, 1H), 7.26 (d,  $J = 16.5$  Hz, 1H), 7.02 (d,  $J = 8.6$  Hz, 1H), 3.22 (s, 3H).

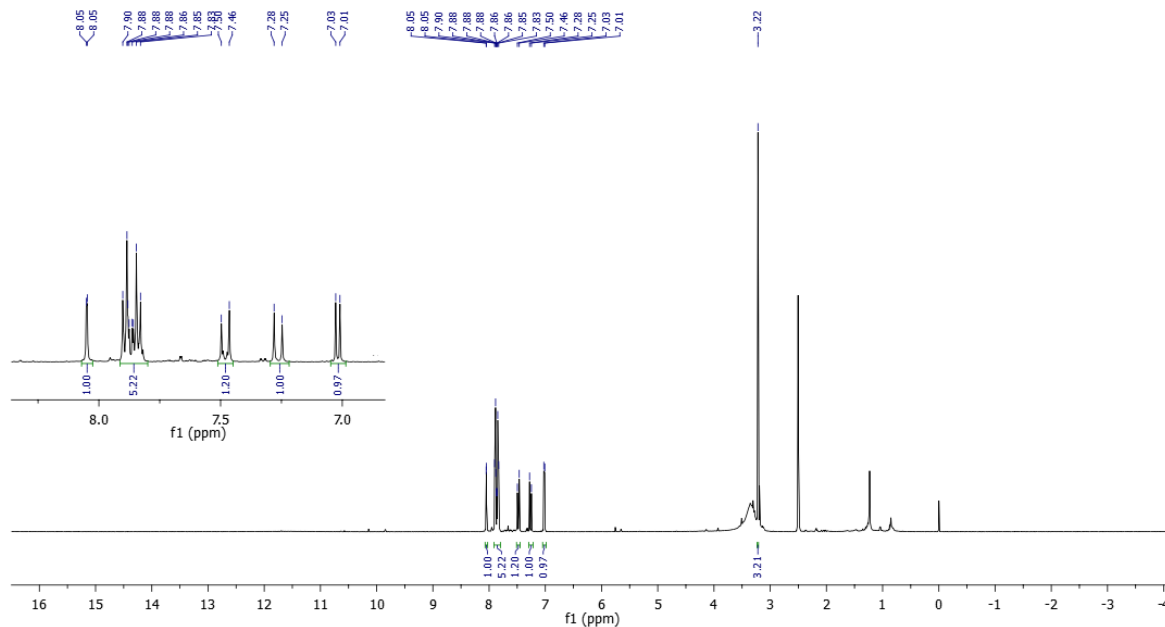

$^{13}\text{C}$  NMR (126 MHz, DMSO)  $\delta$  171.62, 161.25, 142.40, 138.82, 133.38, 131.02, 129.20, 127.79, 127.37, 126.76, 124.99, 117.75, 113.38, 43.58.

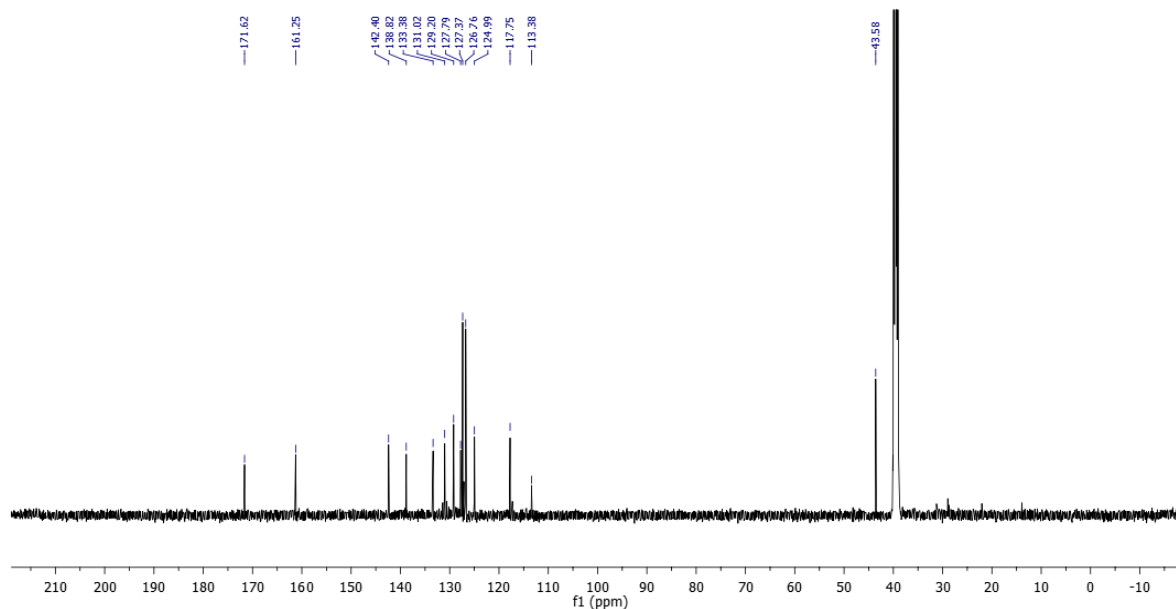

## DC14

$^1\text{H}$  NMR (500 MHz, DMSO)  $\delta$  10.23 (s, 1H), 7.99 (s, 1H), 7.80 (d,  $J = 8.4$  Hz, 1H), 7.71 (s, 4H), 7.38 (d,  $J = 16.4$  Hz, 1H), 6.96 – 7.27 (m, 7H).

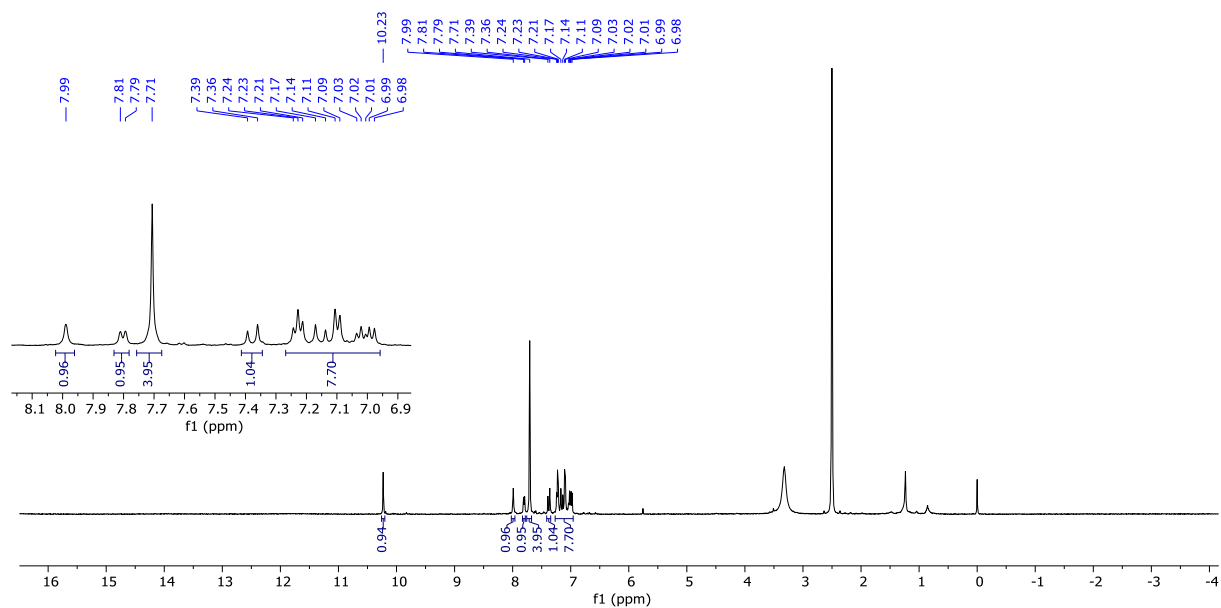

$^{13}\text{C}$  NMR (126 MHz, DMSO, 27°C)  $\delta$  171.58, 160.78, 141.69, 137.71, 137.48, 134.46, 133.22, 130.85, 129.13, 128.69, 127.13, 126.62, 126.00, 124.89, 124.06, 120.09, 117.74.

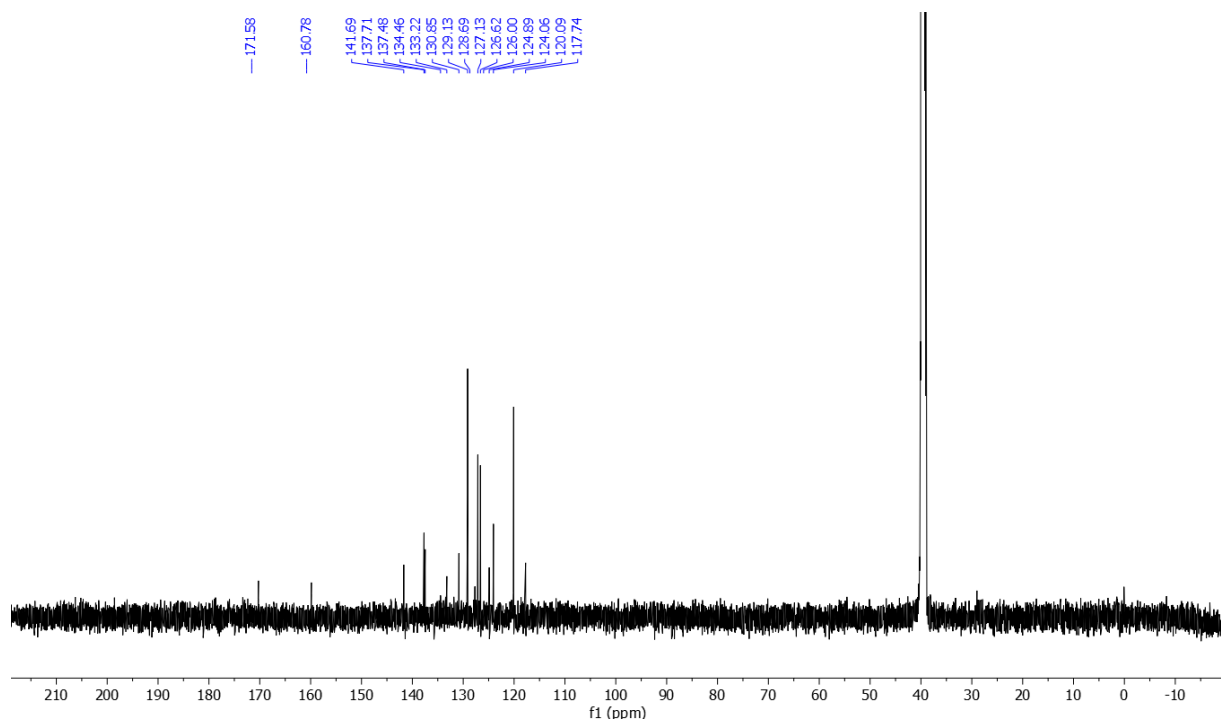

## DC15

$^1\text{H}$  NMR (500 MHz, DMSO)  $\delta$  8.22 (d,  $J = 2.1$  Hz, 1H), 7.71 (dd,  $J = 2.1, 8.7$  Hz, 1H), 7.61 (d,  $J = 7.5$  Hz, 2H), 7.38 (t,  $J = 7.6$  Hz, 2H), 7.24 – 7.33 (m, 2H), 7.04 – 7.19 (m, 2H).

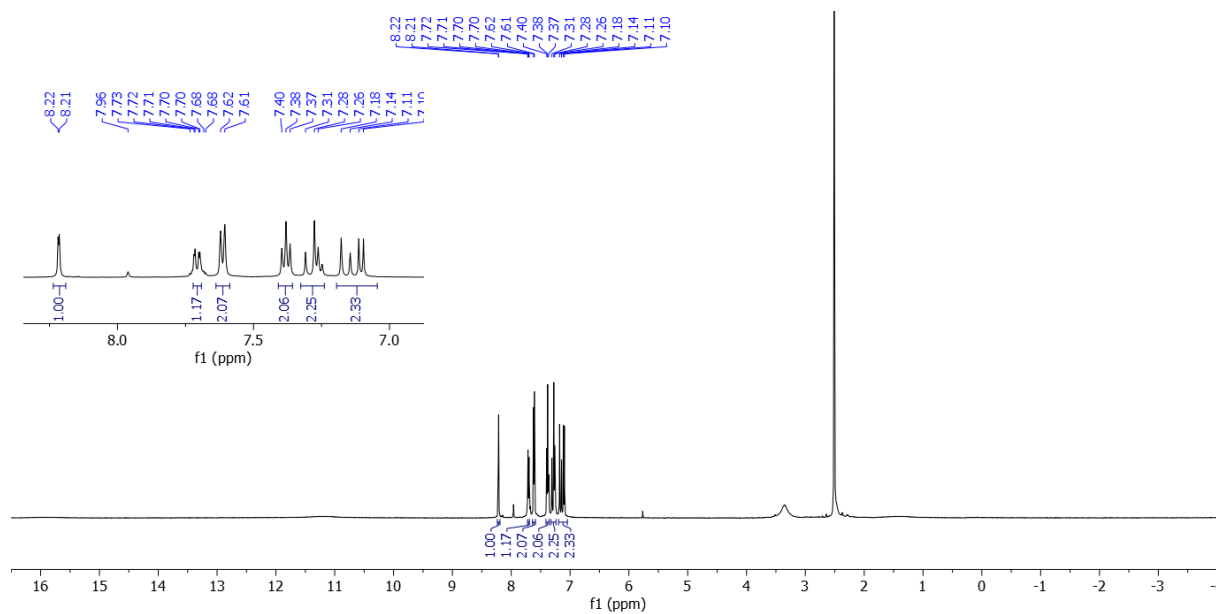

$^{13}\text{C}$  NMR (126 MHz, DMSO)  $\delta$  154.95, 137.18, 130.36, 128.93, 128.67, 127.40, 127.34, 127.21, 126.71, 126.28, 116.77, 110.90.

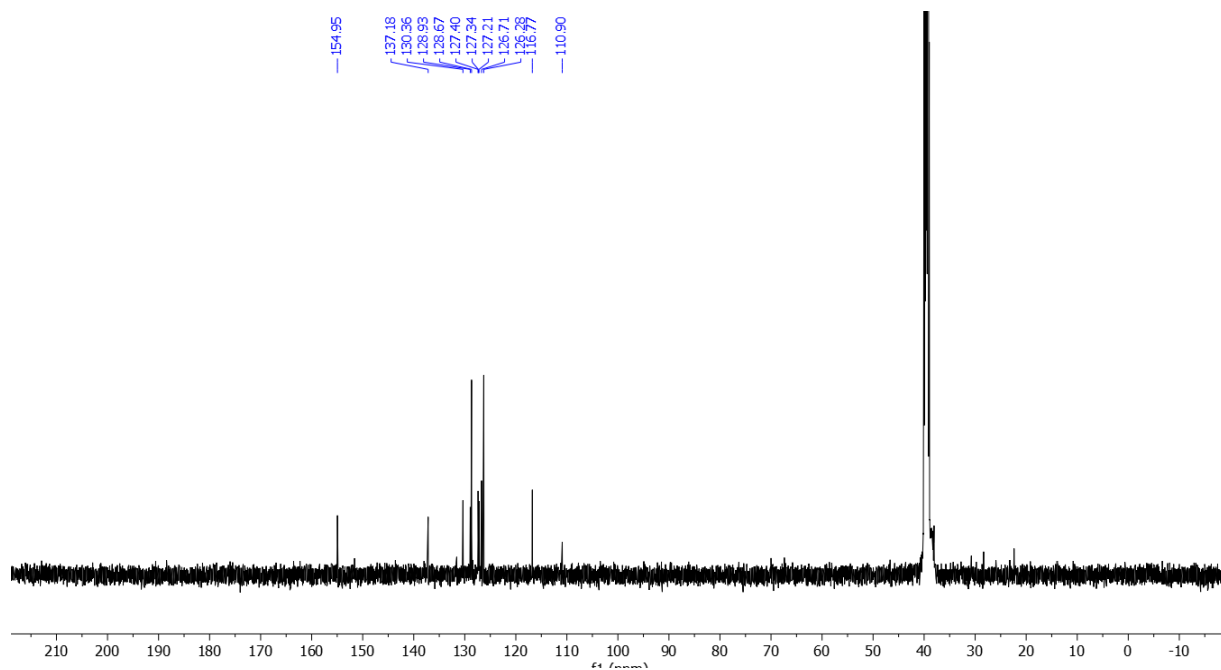

## DC16

$^1\text{H}$  NMR (500 MHz, DMSO)  $\delta$  11.26 (s, 1H), 8.49 (d,  $J = 8.7$  Hz, 1H), 8.17 (d,  $J = 2.0$  Hz, 1H), 7.85 (dd,  $J = 2.0, 8.7$  Hz, 1H), 7.62 (d,  $J = 7.4$  Hz, 2H), 7.38 (t,  $J = 7.7$  Hz, 2H), 7.19 – 7.32 (m, 4H), 2.15 (s, 3H).

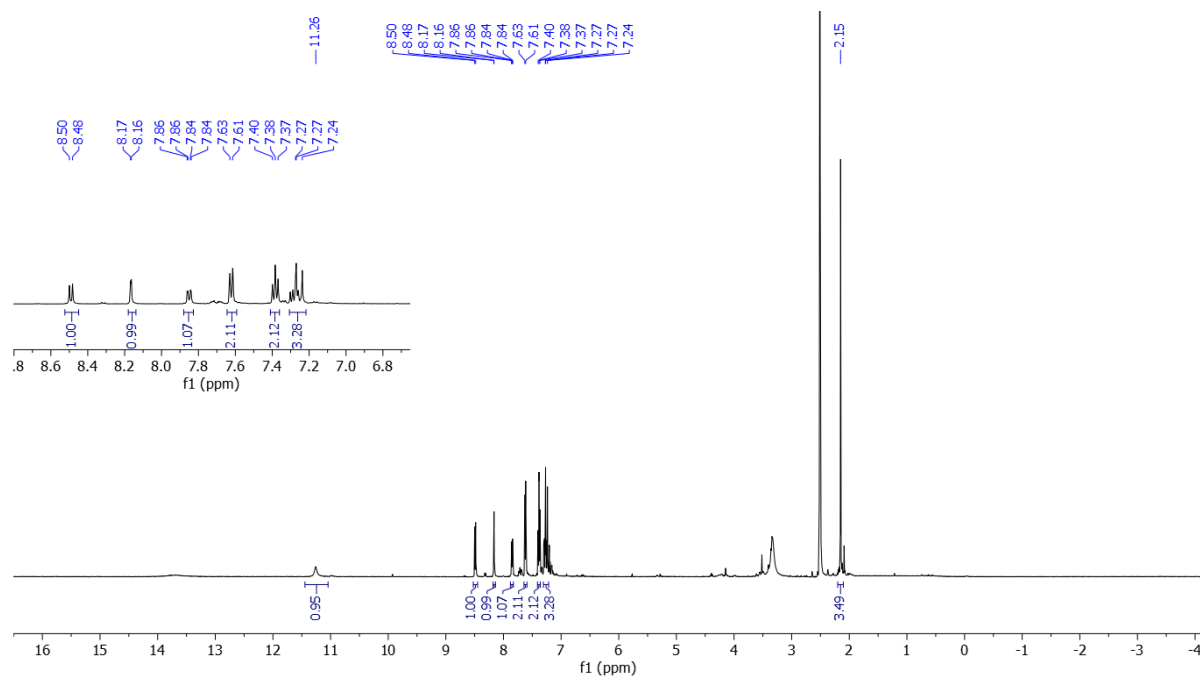

$^{13}\text{C}$  NMR (126 MHz, DMSO)  $\delta$  169.33, 168.36, 140.04, 136.98, 131.32, 131.03, 129.26, 128.68, 128.36, 127.96, 127.59, 127.17, 126.44, 120.09, 25.01.

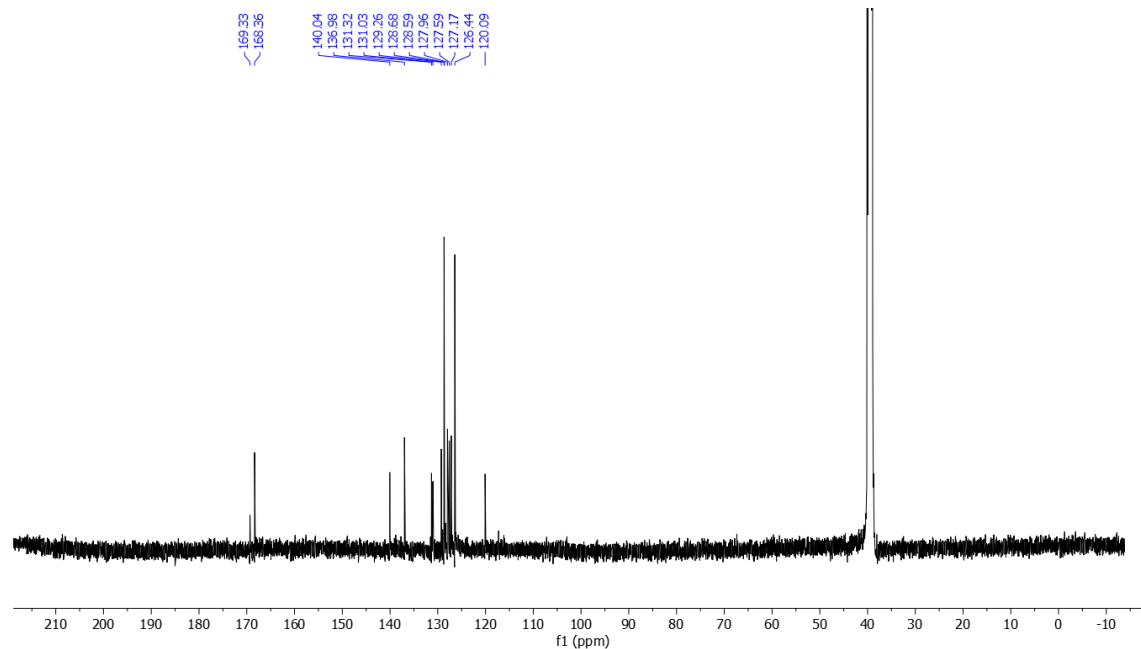

## DC17

$^1\text{H}$  NMR (500 MHz, DMSO)  $\delta$  7.95 (d,  $J = 1.3$  Hz, 1H), 7.86 (dd,  $J = 2.3, 8.6$  Hz, 1H), 7.71 – 7.77 (m, 6H), 7.61 – 7.66 (m, 1H), 7.46 – 7.53 (m, 2H), 7.05 (d,  $J = 8.5$  Hz, 1H).

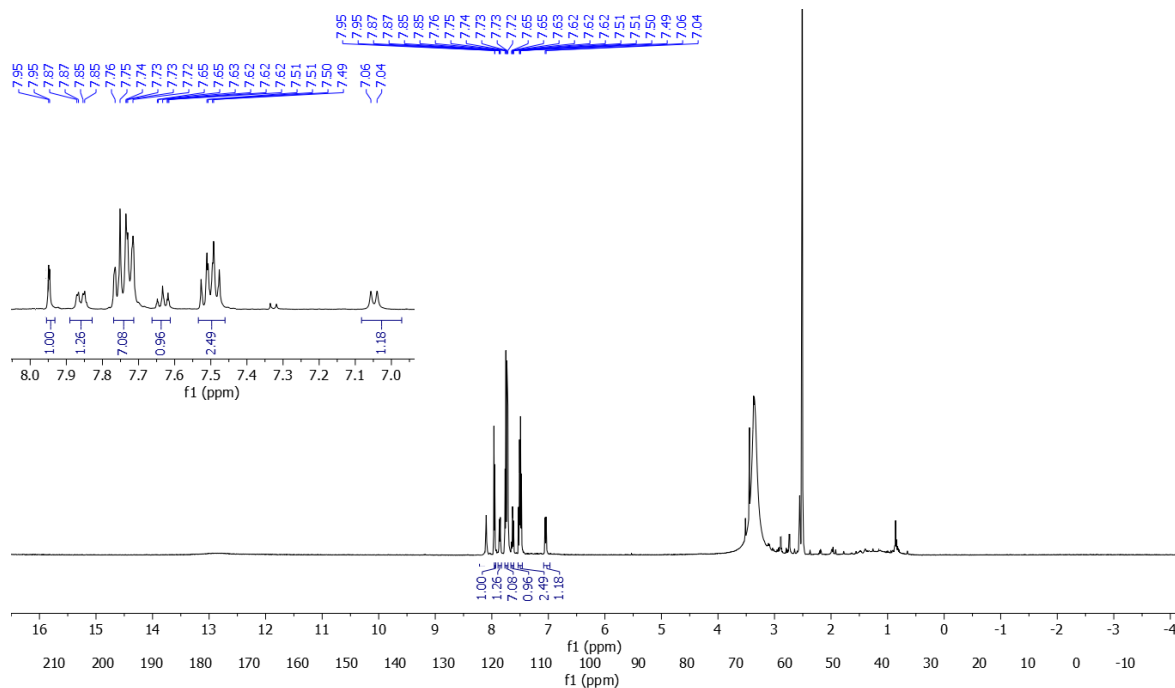

$^{13}\text{C}$  NMR (126 MHz, DMSO, 27°C)  $\delta$  167.29, 162.30, 139.60, 138.58, 138.24, 132.85, 130.73, 129.24, 128.97, 128.55, 127.45, 127.20, 126.57, 126.49, 117.71.

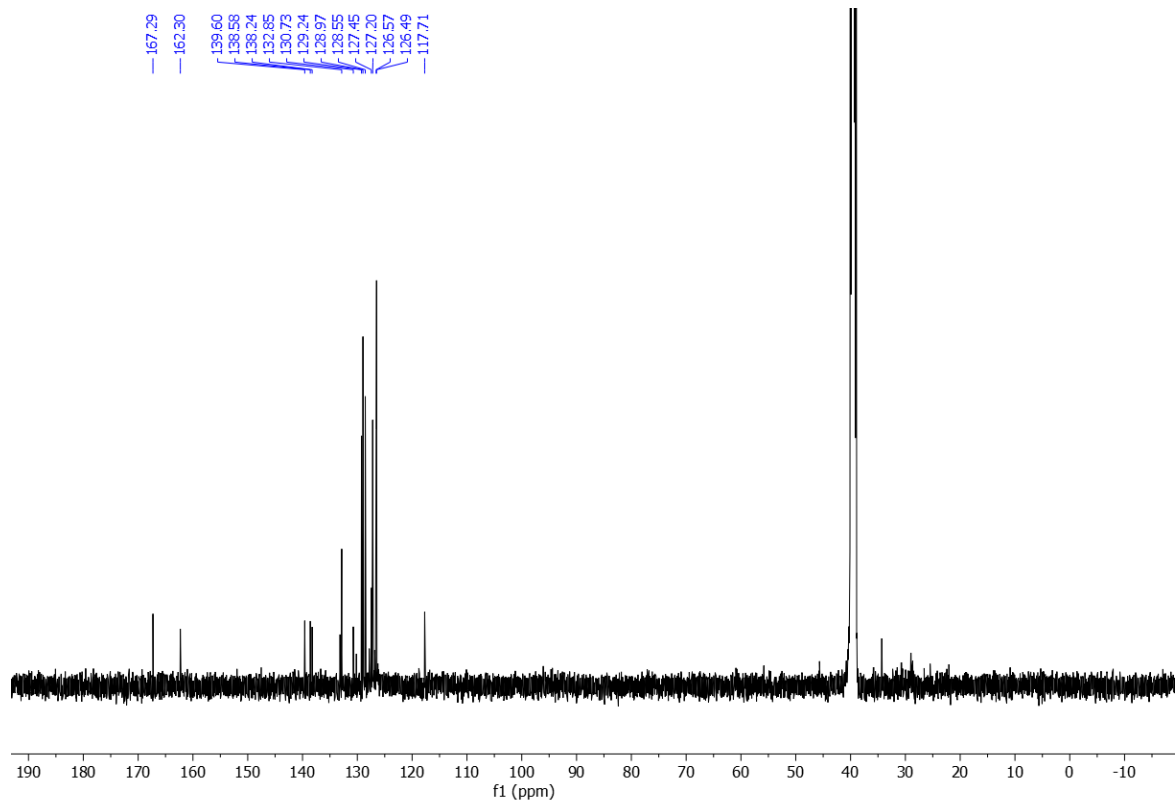



## DC18

$^1\text{H}$  NMR (500 MHz, DMSO)  $\delta$  7.96 (d,  $J = 2.2$  Hz, 1H), 7.84 (s, 1H), 7.78 (dd,  $J = 2.3, 8.7$  Hz, 1H), 7.66 (dd,  $J = 1.0, 8.1$  Hz, 2H), 7.52 (d,  $J = 7.7$  Hz, 1H), 7.48 (d,  $J = 7.9$  Hz, 1H), 7.37 – 7.44 (m, 3H), 7.3 – 7.35 (m, 2H), 7.16 (d,  $J = 16.5$  Hz, 1H), 6.94 (d,  $J = 8.6$  Hz, 1H).

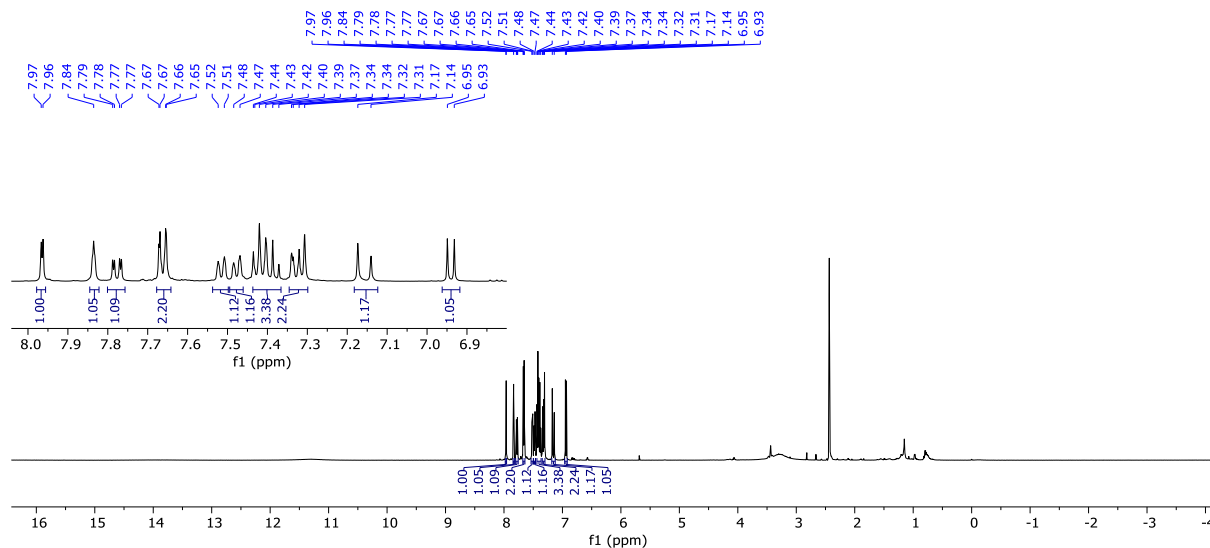

$^{13}\text{C}$  NMR (126 MHz, DMSO, 27°C)  $\delta$  171.77, 160.69, 140.55, 140.06, 137.83, 133.11, 129.24, 128.88, 128.58, 128.53, 127.75, 127.52, 126.75, 126.71, 125.68, 125.38, 124.63, 117.67, 113.14.

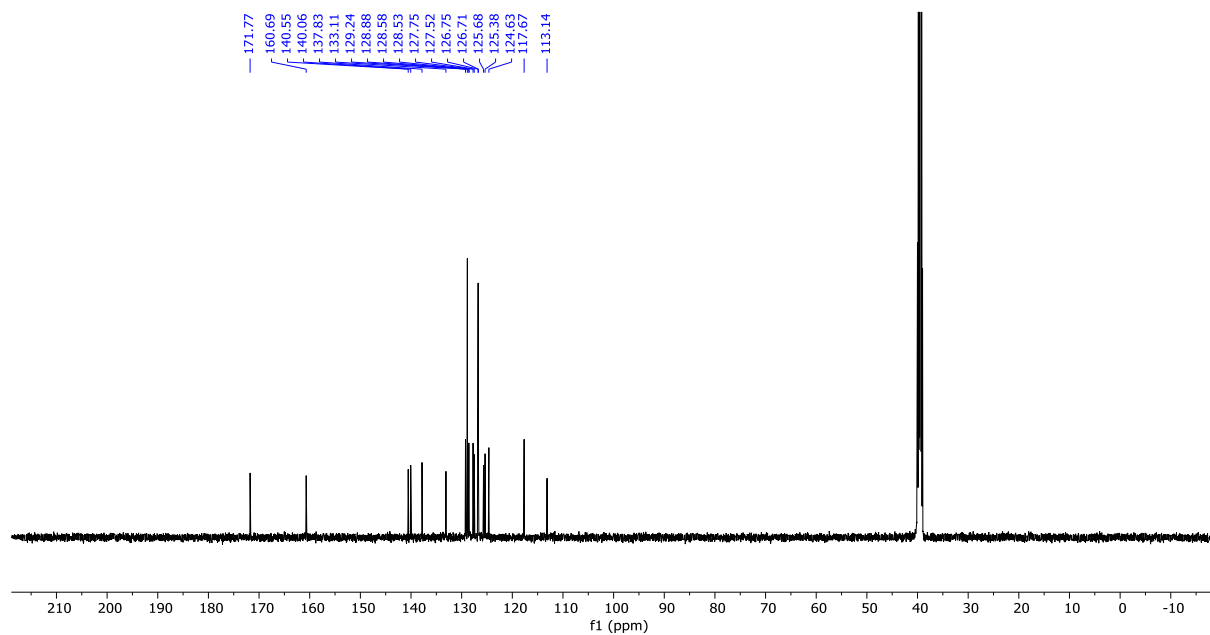

## DC19

$^1\text{H}$  NMR (500 MHz, DMSO)  $\delta$  7.89 (d,  $J = 7.5$  Hz, 1H), 7.86 (d,  $J = 2.2$  Hz, 1H), 7.51 – 7.6 (m, 3H), 7.44 – 7.5 (m, 2H), 7.39 – 7.44 (m, 3H), 7.36 (dd,  $J = 1.4, 7.6$  Hz, 1H), 7.24 (d,  $J = 16.4$  Hz, 1H), 6.92 – 7.01 (m, 2H).

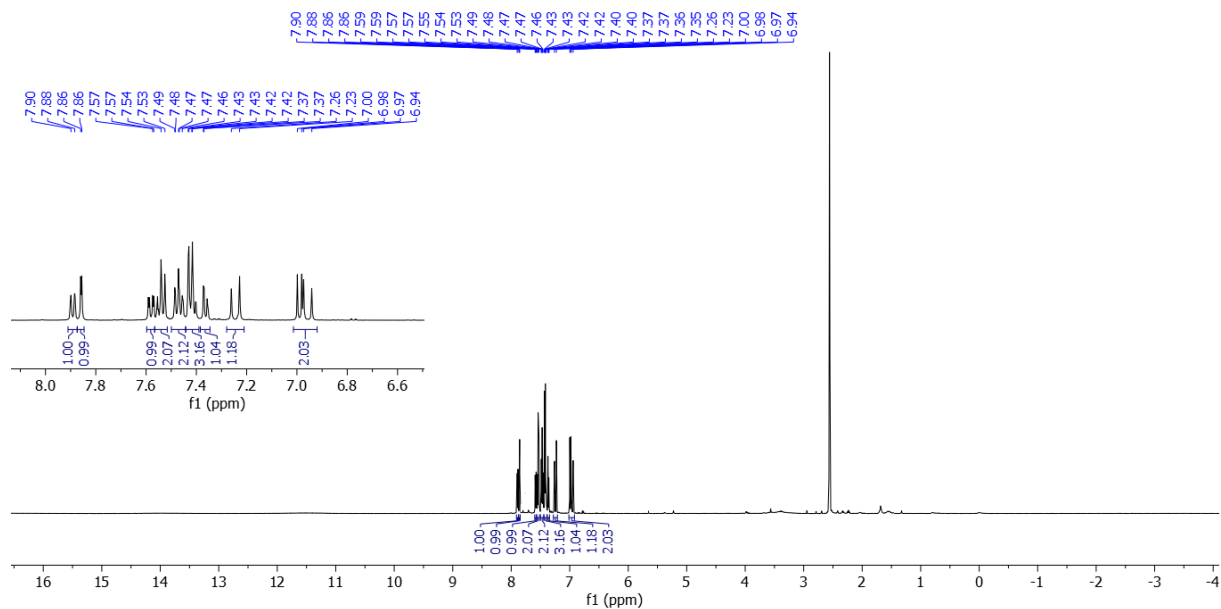

$^{13}\text{C}$  NMR (126 MHz, DMSO)  $\delta$  171.61, 160.68, 140.36, 134.64, 132.76, 131.58, 130.10, 129.52, 128.34, 128.31, 127.71, 127.52, 127.26, 125.67, 125.12, 117.74, 113.20.

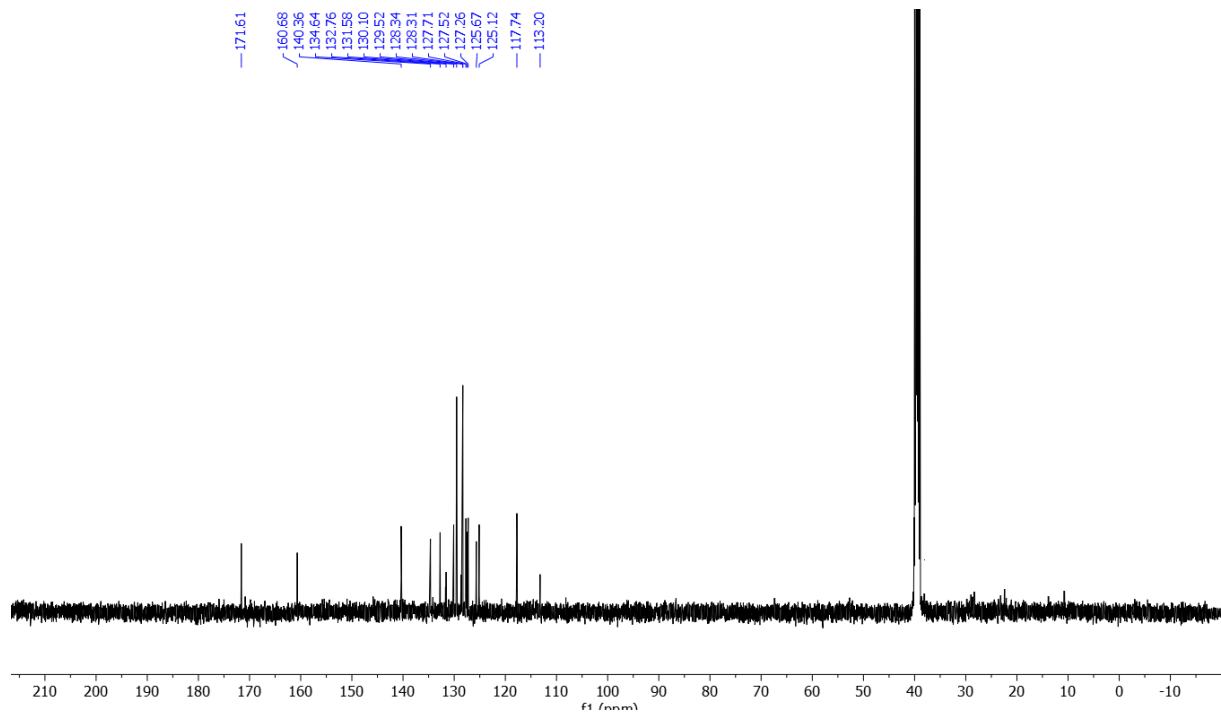

## DC20

$^1\text{H}$  NMR (600 MHz, DMSO)  $\delta$  7.99 – 7.90 (m, 3H), 7.65 (d,  $J = 0.9$  Hz, 1H), 7.56 – 7.52 (m, 2H), 7.25 (dd,  $J = 8.3, 1.7$  Hz, 1H), 6.69 (s, 1H), 1.98 (s, 3H), 1.91 (s, 3H).

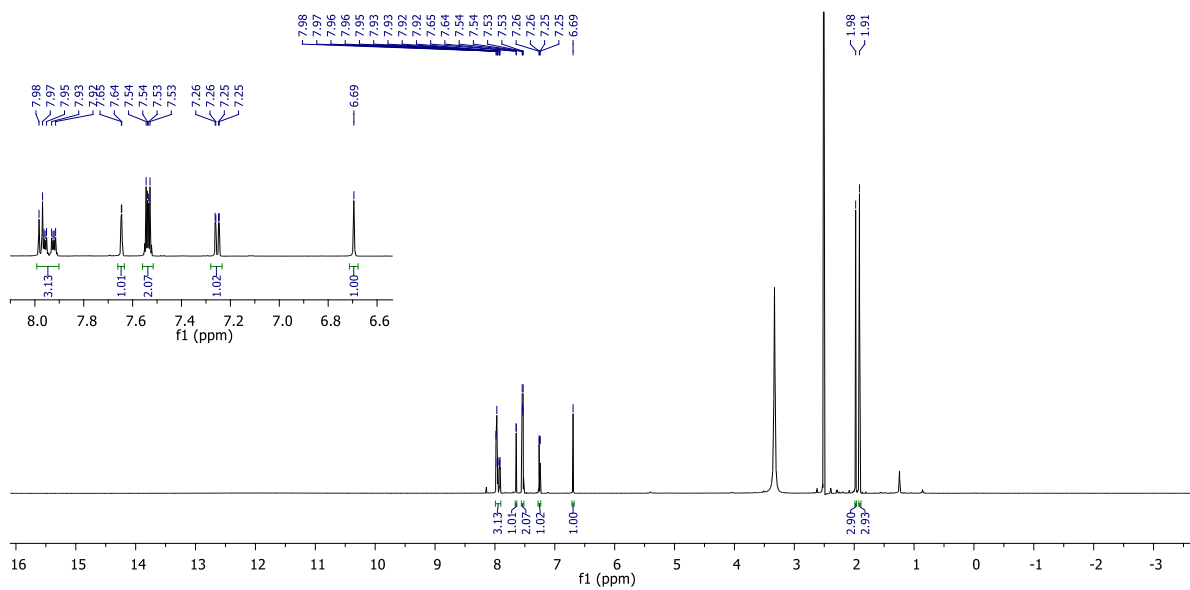

$^{13}\text{C}$  NMR (151 MHz, DMSO)  $\delta$  171.09, 155.69, 138.80, 138.37, 134.71, 133.64, 133.10, 132.26, 128.66, 128.55, 128.44, 128.26, 128.04, 126.61, 126.35, 119.71, 115.14, 21.50, 19.01

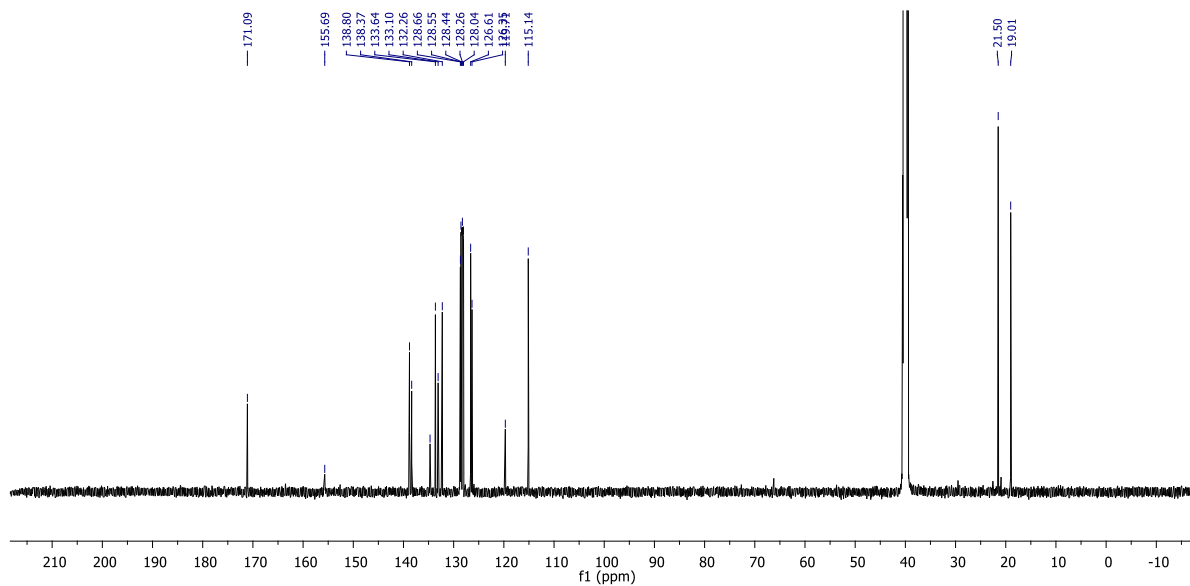

## DC21

$^1\text{H}$  NMR (500 MHz, DMSO)  $\delta$  8.05 (d,  $J = 2.2$  Hz, 1H), 7.82 – 7.86 (m, 2H), 7.77 – 7.82 (m, 2H), 7.51 – 7.56 (m, 2H), 7.28 – 7.39 (m, 3H), 7.22 (d,  $J = 16.4$  Hz, 1H), 7.02 (d,  $J = 8.6$  Hz, 1H), 1.47 (s, 6H).

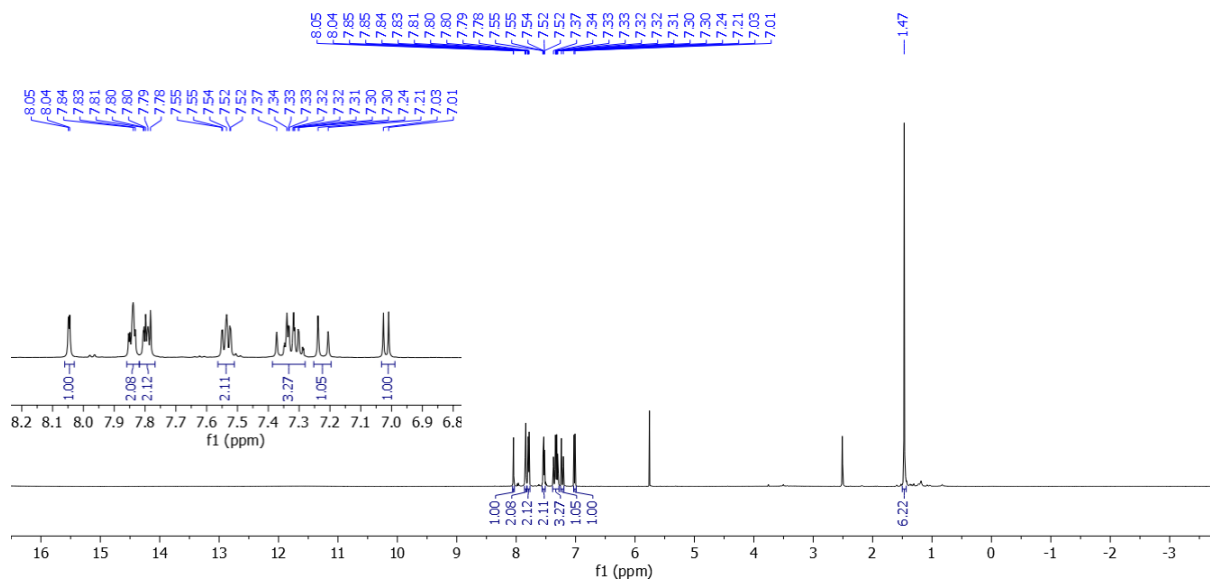

$^{13}\text{C}$  NMR (126 MHz, DMSO)  $\delta$  171.82, 160.63, 153.80, 153.52, 138.34, 137.95, 136.52, 132.96, 128.71, 128.45, 127.24, 127.21, 127.04, 126.84, 125.94, 122.73, 120.29, 120.27, 120.04, 117.69, 113.17, 26.86.

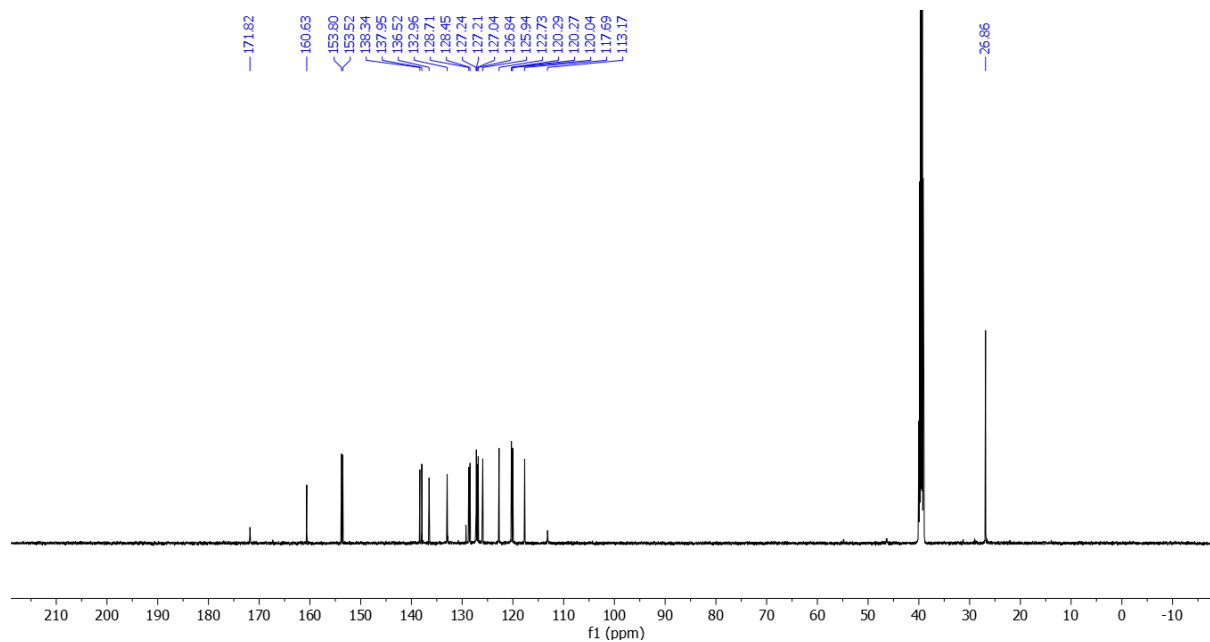

Supplement: CMDC-16-2650-s001.pdf [file CMDC-16-2650-s001.pdf]
